# Supplementary material for: Prevalence of early postnatal care services usage and associated factors among postnatal women of Wolkite town, Gurage zone, Southern Ethiopia: a community-based cross-sectional study
Source: PubMed Central journal article supplement — BMJ Open. 2023 Jan 13;13(1):e061326. doi: 10.1136/bmjopen-2022-061326 (PMC9843198; doi:10.1136/bmjopen-2022-061326), 2023-01-13
Supplement: bmjopen-2022-061326.draft_revisions.pdf [file bmjopen-2022-061326.draft_revisions.pdf]

# BMJ Open

BMJ Open is committed to open peer review. As part of this commitment we make the peer review history of every article we publish publicly available.

When an article is published we post the peer reviewers' comments and the authors' responses online. We also post the versions of the paper that were used during peer review. These are the versions that the peer review comments apply to.

The versions of the paper that follow are the versions that were submitted during the peer review process. They are not the versions of record or the final published versions. They should not be cited or distributed as the published version of this manuscript.

BMJ Open is an open access journal and the full, final, typeset and author-corrected version of record of the manuscript is available on our site with no access controls, subscription charges or pay-per-view fees (<http://bmjopen.bmj.com>).

If you have any questions on BMJ Open's open peer review process please email [info.bmjopen@bmj.com](mailto:info.bmjopen@bmj.com)

# BMJ Open

## Early postnatal care services utilization and associated factors among postnatal women in Wolkite town, southeast Ethiopia, 2021

|                               |                                                                                                                                                                                                                                                                                                                                                                                                                                                                                                                                                                                                                                                                      |
|-------------------------------|----------------------------------------------------------------------------------------------------------------------------------------------------------------------------------------------------------------------------------------------------------------------------------------------------------------------------------------------------------------------------------------------------------------------------------------------------------------------------------------------------------------------------------------------------------------------------------------------------------------------------------------------------------------------|
| Journal:                      | <i>BMJ Open</i>                                                                                                                                                                                                                                                                                                                                                                                                                                                                                                                                                                                                                                                      |
| Manuscript ID                 | bmjopen-2022-061326                                                                                                                                                                                                                                                                                                                                                                                                                                                                                                                                                                                                                                                  |
| Article Type:                 | Original research                                                                                                                                                                                                                                                                                                                                                                                                                                                                                                                                                                                                                                                    |
| Date Submitted by the Author: | 28-Jan-2022                                                                                                                                                                                                                                                                                                                                                                                                                                                                                                                                                                                                                                                          |
| Complete List of Authors:     | Lamiso, Yirgalem; Wolkite University, College of Health Science, Department of Midwifery<br>Senbata, Mebratu; Wolkite University, College of Health Science, Midwifery<br>Abeje, Seblework ; Wolkite University, College of Health Science, Department of Medical Biochemistry<br>Walle, Fantahun; Wolkite University, College of Health Science, Department of Nursing<br>Tenaw, Shegaw Geze; Wolkite University, College of Health Science, Department of Midwifery<br>Derribow, Aberash; Wolkite University, College of Health Science, Department of Midwifery<br>Mohamed, Mariama Shifa; Wolkite University, College of Health Science, Department of Midwifery |
| Keywords:                     | OBSTETRICS, HEALTH SERVICES ADMINISTRATION & MANAGEMENT, HISTORY (see Medical History), Gynaecological oncology < GYNAECOLOGY, Health & safety < HEALTH SERVICES ADMINISTRATION & MANAGEMENT, Health policy < HEALTH SERVICES ADMINISTRATION & MANAGEMENT                                                                                                                                                                                                                                                                                                                                                                                                            |
|                               |                                                                                                                                                                                                                                                                                                                                                                                                                                                                                                                                                                                                                                                                      |

SCHOLARONE™  
Manuscripts

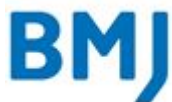

I, the Submitting Author has the right to grant and does grant on behalf of all authors of the Work (as defined in the below author licence), an exclusive licence and/or a non-exclusive licence for contributions from authors who are: i) UK Crown employees; ii) where BMJ has agreed a CC-BY licence shall apply, and/or iii) in accordance with the terms applicable for US Federal Government officers or employees acting as part of their official duties; on a worldwide, perpetual, irrevocable, royalty-free basis to BMJ Publishing Group Ltd ("BMJ") its licensees and where the relevant Journal is co-owned by BMJ to the co-owners of the Journal, to publish the Work in this journal and any other BMJ products and to exploit all rights, as set out in our [licence](#).

The Submitting Author accepts and understands that any supply made under these terms is made by BMJ to the Submitting Author unless you are acting as an employee on behalf of your employer or a postgraduate student of an affiliated institution which is paying any applicable article publishing charge ("APC") for Open Access articles. Where the Submitting Author wishes to make the Work available on an Open Access basis (and intends to pay the relevant APC), the terms of reuse of such Open Access shall be governed by a Creative Commons licence – details of these licences and which [Creative Commons](#) licence will apply to this Work are set out in our licence referred to above.

Other than as permitted in any relevant BMJ Author's Self Archiving Policies, I confirm this Work has not been accepted for publication elsewhere, is not being considered for publication elsewhere and does not duplicate material already published. I confirm all authors consent to publication of this Work and authorise the granting of this licence.

## Early postnatal care services utilization and associated factors among postnatal women in Wolkite town, southeast Ethiopia, 2021

Yirgalem Yosef Lamiso\*<sup>1</sup>, Mebratu Demissie Senbata<sup>1</sup>, Seblework Abeje Abiy<sup>2</sup>, Fantahun Walle Berriera<sup>3</sup>, Shegaw Geze Tenaw<sup>1</sup>, Aberash Beyene Derribow<sup>1</sup>, Mariama Shifa Mohamed<sup>1</sup>

<sup>1</sup>Department of Midwifery, College of Medicine and Health Sciences, Wolkite University, Wolkite, Ethiopia

<sup>2</sup>Department of Biochemistry, College of Medicine and Health sciences, Wolkite University, Wolkite, Ethiopia

<sup>3</sup>Department of Nursing, College of Medicine and Health Sciences, Wolkite University, Wolkite, Ethiopia

\*Correspondence: Department of midwifery, College of Medicine and Health Sciences, Wolkite University, Wolkite, Ethiopia; [Yirgalem.yosef@wku.edu.et](mailto:Yirgalem.yosef@wku.edu.et)

### Authors' address

1. Yirgalem Yosef Lamiso (YYL): [Yirgalem.yosef@wku.edu.et](mailto:Yirgalem.yosef@wku.edu.et)
2. Mebratu Demissie Senbata (MDS): [mebreдемis21@gmail.com](mailto:mebreдемis21@gmail.com)
3. Seblework abeje Abiy (SAA): [Seblework.abeje@wku.edu.et](mailto:Seblework.abeje@wku.edu.et)
4. Fantahun Walle Berriera (FWB): [Fantahunwalle@gmail.com](mailto:Fantahunwalle@gmail.com)
5. Shegaw Geze Tenaw (SGT): [shagaw.geze@gmail.com](mailto:shagaw.geze@gmail.com)
6. Aberash Beyene Derribow (ABD): [aberashbey217@gmail.com](mailto:aberashbey217@gmail.com)
7. Mariama Shifa Mohamed (MSM): [daarra16@gmail.com](mailto:daarra16@gmail.com)

## ABSTRACT

**Objective:** To assess the prevalence of early postnatal care services utilization and associated factors among postnatal women of Wolkite town, southeast Ethiopia.

**Design:** A community-based cross-sectional study was conducted on postnatal women (n=301) of Wolkite town from 15 May to 15 June 2021.

**Measurements:** Data were collected using a structured interviewer-administered questionnaire. The multivariate logistic regression model was fitted to identify the factors associated with early postnatal care services utilization; adjusted OR (AOR) with a 95% CI was computed to assess the strength of associations.

**Results:** The study revealed that the prevalence of early postnatal care services utilization was 23.3% with 95% CI 18.9 to 27.9. Wanted pregnancy (AOR=4.17, 95%CI 1.93 to 9.03), had more than 4 histories of pregnancy (Gravida $\geq$ 4) (AOR=2.90, 95%CI 1.18 to 7.11) and had spontaneous vertex delivery (AOR=2.18, 95%CI 1.07 to 9.39) were factors associated with early postnatal care service utilization.

**Conclusion:** The prevalence of early postnatal care service utilization was low. Wanted pregnancy, had more than 4 histories of pregnancy (Gravida $\geq$ 4), and had spontaneous vertex delivery were predictors of early postnatal care services utilization. Therefore, this study suggests health care providers should provide health education focus their efforts on increasing early postnatal care service utilization in those who may not have wanted to be pregnant, those who have first pregnancy, and those who deliver by cesarean section.

**Key words:** Early postnatal care, Utilization, Southern Ethiopia

### Strength and Limitations of this study

- This study identified the factors associated with early postnatal care services utilization among postnatal women in the study area.
- As this is a community-based study with an adequate sample size and its finding is highly generalizable for the town and the study might be used to develop strategy in order to increase early postnatal care service utilization in the town.
- This study also assessed both maternal and newborn postnatal components, while the previous study focused only maternal components.
- The community- based cross-sectional study has possible limitations that may arise from postnatal women's readiness and ability to provide information about them and their families correctly during data collection, therefore recall bias may be introduced during data collection, so the study could be improved by longitudinal study.

## INTRODUCTION

Globally, approximately 810 women die every day from preventable causes related to pregnancy and childbirth complications, 94% of women's death occur in low and middle-income countries<sup>(1)</sup>. According to world health organization (WHO) report, more than 60% of global maternal deaths occur in the postpartum period<sup>(2)</sup>. Three-fourths of maternal mortality occurred within the first week of delivery<sup>(3)</sup>

The first six weeks (42days) after giving birth is known as the postpartum period <sup>(4, 5)</sup>. The first week (7 days) is an intense time and requires all sorts of care for women and newborn babies. Early postnatal care refers to health care services provided to mother and newborn baby by health care professionals within first weeks after giving birth<sup>(2, 6)</sup>.

Globally, 30% of mothers follow postnatal care, thus 13% of the postnatal follow-up in sub-Saharan Africa <sup>(7)</sup>. Research findings also showed that the prevalence of early postnatal care utilization varied to a certain extent among regions in Africa. For instance, Uganda <sup>(8)</sup> and South Sudan<sup>(9)</sup> reported 15.4% and 11.4%, respectively. Variations were also noted research conducted in Ethiopia, like Southern Ethiopia at Hawassa Zuria<sup>(10)</sup> and Wonango District<sup>(11)</sup> North Ethiopia<sup>(12)</sup> reported 29.7%,13.7%, and 34.3%, respectively.

Globally, every year three million infants die in the first week of life, and 900 000 die in the next three weeks <sup>(13, 14)</sup>. According to a united nations international children emergency fund (UNICEF) report in Ethiopia, nearly 240 babies will die each day before reaching their first month of life<sup>(15)</sup>. The Ethiopian demographic and health survey( EDHS) 2019 report, revealed that the neonatal mortality rate (NMR) of the country is 29 deaths per 1,000 live births <sup>(16, 17)</sup>, neonatal deaths occur at birth, and early postnatal period due to inadequacy of care <sup>(18, 19)</sup>.

1  
2  
3 In developing countries, there are different factors that decrease early postnatal care services  
4 utilization like home delivery, illiteracy, low income, and cultures<sup>(20, 21)</sup>. This makes the early  
5 postnatal care services program the weakest of all reproductive and child health programs. As a  
6 result of low adherence to recommended postnatal care (PNC) regimens, women in sub-Saharan  
7 Africa posed a significant risk to infant and maternal morbidities and mortality <sup>(22)</sup>.

8  
9  
10 Despite the establishment of a number of global and national initiatives to improve maternally  
11 and child health, maternal mortalities and mortality is still continued as a global challenge <sup>(4)</sup>.

12  
13  
14 Early postnatal care service is the most important maternal and child health care service to detect  
15 early maternal and newborn danger signs and complications by health care providers<sup>(23)</sup>.

16  
17  
18 Recognizing early postnatal care service utilization offers an opportunity to reduce postnatal  
19 maternal and newborn complications. Moreover, as per the knowledge of the principal  
20 investigator, few studies were done on early postnatal care service utilization and associated  
21 factors. Even though studies assessed only maternal postnatal components, this study was  
22 included both maternal and newborn postnatal components and few are known regarding the  
23 prevalence of early postnatal service utilization in Ethiopia. Hence, this study was aimed to  
24 assess the prevalence of early postnatal service services utilization and associated factors among  
25 mothers who gave birth in the last 12 months in Gurage Zone, SNNPR, and Ethiopia.



## **METHODS AND MATERIALS**

### **Study design and setting**

This was a community-based cross-sectional study conducted from 15 May to 15 June 2021, at Wolkite Town, southeast Ethiopia. The town is located 155 km south of Addis Ababa, the capital city of Ethiopia. According to the 2007 Census conducted by the Central Statistical Agency of Ethiopia, Wolkite town has a total population of 28,856 of whom 15,068 were males and 13,788 females (24) residents served by one public hospital, three health centers, and nine private clinics.

### **Source and Study Population**

Postnatal women aged 18 years and above who gave birth in the last 12 months living in the town and its selected sub-cities were the source and study populations, respectively. Individuals who gave birth more than 12 months and were critically ill during the data collection period were excluded from the study.

### **Patient and Public Involvement**

Patients were not involved in the study

### **Sample Size Determination**

The sample size was determined by using a single population proportion formula using the following assumptions: a confidence interval of 95%, the margin of error of 5%, and the prevalence of early postnatal service utilization of 23.7% <sup>(10)</sup>. By adding a 10% non-response rate, the final sample size was 306. The study participants were selected using a systematic random sampling technique.

## Sampling Techniques

The list of women who gave birth in the last 12 months was obtained from delivery registers and cross-checked with the community health information system (CHIS) of health posts. Wolkite town has 11 kebeles from which 4 were selected using the lottery method, and then a sample was allocated proportionally to each kebeles. Finally, the study participants were selected by using a systematic random sampling technique, and 301 eligible mothers who gave birth within the last 12 months preceding the survey were interviewed. Hence five (5) study participants were non-respondent after three consecutive home visits.

## Data Collection Instruments and Procedures

The data collection tool was prepared in English after reviewing related literature and then translated to the Amharic language. The questionnaire consisted of socio-demographic characteristics, obstetrics characteristics, service-related characteristics, and sources of knowledge about early postnatal care (**Annex 1**). Data were collected using pre-tested structured interviewer-administered questionnaire. To assure the quality of data: Four diploma midwives were trained for data collection and two BSc midwives were assigned as a supervisor under the supervision of the principal investigator. Filled questionnaires were daily checked for completeness and consistency. The reliability of the questionnaire was checked by Cronbach's alpha value, which was 0.78.

## Study Variables and Data Measurement

The dependent variable was early postnatal care utilization. Independent variables were as follows: socio-demographic characteristics (Age, Marital status, religion, ethnicity, educational level, occupational status, Husbands educational status, Husbands occupation, Estimated monthly income, and Family size), Obstetrics characteristics (Gravidity, Parity, Having ANC visit, Number of visits, Place of last ANC visit, Course of pregnancy, Place of delivery, Delivery

1  
2  
3 attendant, Mode of delivery , Birth outcome, Any history of neonatal death, Wantedness of  
4 pregnancy, Getting advice on importance of PNC, Maternal complication during postnatal  
5 period, and Newborns complication during pregnancy), Service-related characteristics (Means of  
6 transportation, Decision maker on maternity care, Getting help for health services, Maternity  
7 waiting room, Duration of stay) and Sources of knowledge (Know the advantages of PNC, Know  
8 the recommended postnatal visits, Know the correct timing of PNC, Knows that PNC is free  
9 service, Knows at least one components of the service, Knows at least one newborn danger signs,  
10 Know consequences of not receiving recommended PNC, Place where PNC is delivered).

11  
12 **Early postnatal care utilization:** In this study, if a mother had at least one postnatal care check-  
13 up for the last delivery by skilled health care providers within 7 days after delivery, “Yes for  
14 early postnatal care utilization, otherwise no”<sup>(8, 24, 25)</sup>.

15  
16 **Skilled health care providers:** Include (Nurses, Midwives, Health Officers, HEW, and  
17 Doctors)<sup>(26)</sup>.

### 18 19 20 **Data Management and Analysis**

21  
22 Data were cleaned and entered into Epi Data 3.1 and exported to SPSS 25 for analysis. The data  
23 was cleaned by running frequency, checking missing values, and the presence of outliers. We  
24 summarized proportions of categorical variables by using mean with standard deviation (SD)  
25 based on the distribution of data for continuous variables. Normality was checked using the  
26 Shapiro–Wilk test. The factors associated with the dependent variable were analyzed using  
27 binary logistic regression. Bivariate analysis, crude odds ratio (COR) with 95% CI, was used to  
28 see the association between outcome variable with each independent variable. Variables with a  
29 p-value of  $\leq 0.25$  in the bivariate analysis were selected for the multivariable logistic regression  
30 model. Multi-collinearity was checked to see the linear correlation among the independent  
31 variables. Model goodness of fitness was tested by Hosmer-Lemeshow statistic. The strength of  
32 the association between dependent and independent variables was assessed using an adjusted  
33 odds ratio (AOR) with a 95% confidence interval. A p-value was used to report the level of  
34 significance of each independent variable with a dependent variable.  
35  
36  
37  
38  
39  
40  
41  
42  
43  
44  
45  
46  
47  
48  
49  
50  
51  
52  
53  
54  
55  
56  
57  
58  
59  
60

## RESULTS

### Socio-demographic characteristics

A total of 301 study participants were involved in this study, with a response rate of 98.4%. the majority of the respondents 280(93.0%) were married, 144(47.8%) of the respondents were Orthodox religion followers, 275(91.4%) were Gurage by ethnicity, 142(47.2%) had no formal education, more than two-thirds, 188 (62.5%) of the participant were housewife, more than two-fifth, 129(42.9%) of husbands of the respondents had no formal education, almost three-fourth, 225(74.8%) of the respondent were farmers and nearly one-half, 149(49.5%) of the respondents' had income below the mean level (597.4 birrs). The minimum and maximum numbers of family sizes were 2 and 8, respectively, with the mean of  $4 \pm$  (standard deviation of 1) (**Table 1**).

Table 1: Socio-demographic characteristics of early postnatal care services utilization among postnatal women in Wolkite town, southeast Ethiopia, 2021 (n=301)

| Category                   | Frequency | Percent (%) |
|----------------------------|-----------|-------------|
| <b>Age of the mother</b>   |           |             |
| Less than 20               | 22        | 7.3         |
| 20-34                      | 206       | 68.4        |
| ≥35                        | 73        | 24.3        |
| <b>Marital status</b>      |           |             |
| Married                    | 280       | 93          |
| Unmarried                  | 13        | 4.3         |
| Divorced                   | 6         | 2.0         |
| Widowed                    | 2         | 0.7         |
| <b>Religion</b>            |           |             |
| Orthodox                   | 144       | 47.8        |
| Muslim                     | 122       | 40.5        |
| Protestant                 | 31        | 10.3        |
| Catholic                   | 4         | 1.3         |
| <b>Ethnicity</b>           |           |             |
| Gurage                     | 275       | 91.4        |
| Amhara                     | 24        | 8.0         |
| Oromo                      | 2         | 0.7         |
| <b>Educational status</b>  |           |             |
| No formal education        | 142       | 47.2        |
| Grade 1-8                  | 70        | 23.3        |
| Secondary 9-12             | 77        | 25.6        |
| College and above          | 12        | 4.0         |
| <b>Occupational status</b> |           |             |
| House wife                 | 188       | 62.5        |
| Civil servant              | 11        | 3.7         |
| Merchant                   | 76        | 25.2        |

|                                    |     |      |
|------------------------------------|-----|------|
| Daily laborer                      | 18  | 6.0  |
| Farmer                             | 8   | 2.7  |
| <b>Husbands educational status</b> |     |      |
| No formal education                | 129 | 42.9 |
| Grade 1-8                          | 108 | 35.9 |
| Secondary 9-12                     | 53  | 17.6 |
| College and above                  | 11  | 3.7  |
| <b>Husbands occupation</b>         |     |      |
| Farmer                             | 225 | 74.8 |
| Civil servant                      | 13  | 4.3  |
| Merchant                           | 55  | 18.3 |
| Daily laborer                      | 8   | 2.7  |
| <b>Estimated monthly income</b>    |     |      |
| Below average (597.4 ETB)          | 149 | 49.5 |
| More than average (597.4 ETB)      | 152 | 50.5 |
| <b>Family size</b>                 |     |      |
| Less than average (4)              | 154 | 51.2 |
| More than average (4)              | 147 | 48.8 |

## Obstetrics related characteristics

Among the respondents, almost two-fifths, 119(39.5%) had been pregnant for the first time and more than four-fifths, 268(89.0%) had ANC visits. Of the ANC attendants, 83(30.9%) have one ANC visit and 80(29.8%) have four and above visits. Regarding the place of last ANC visit, 208(77.6%) was at the health center. Related to the course of pregnancy, almost two-fifths, 112(37.2%) of the respondents had a complicated pregnancy, four-fifths, 236(78.4%) of the respondents were given birth at a health center and most of the respondents, 284(94.4%) were attended by health professionals. According to the mode of delivery, more than four-fifths, 254(84.4%) of the respondents were delivered by SVD (**Table 2**).

## Maternal complications

Among the respondents, 18.3% had maternal complications' during the early postnatal period. Of the complications 4.3% were sepsis, and 3.7% were PPH (**Figure 1**).

## New born complications

Among the respondents, 27.9% had newborn complications during the early postnatal period. Of the complications, 16.3% were unable to breastfeed, and 7% were having breathing difficulties (**Figure 2**).

Table 2: Obstetrics characteristics of early postnatal care services utilization among postnatal women in Wolkite town, Gurage zone, southeast Ethiopia, 2021(n=301)

| <b>Variables</b>    | <b>Category</b>          | <b>Frequency</b> | <b>Percentage</b> |
|---------------------|--------------------------|------------------|-------------------|
| Gravidity           | One                      | 119              | 39.5              |
|                     | 2-4                      | 106              | 35.2              |
|                     | ≥5                       | 76               | 25.2              |
| Parity              | One                      | 119              | 39.5              |
|                     | 2-4                      | 106              | 35.2              |
|                     | ≥5                       | 76               | 25.2              |
| Having ANC visit    | Yes                      | 268              | 89.0              |
|                     | No                       | 33               | 11.0              |
| Number of visits    | One                      | 83               | 31                |
|                     | Two                      | 55               | 20.5              |
|                     | Three                    | 50               | 18.6              |
|                     | Four and above           | 80               | 29.8              |
| Place of ANC visit  | Health center            | 208              | 77.6              |
|                     | Hospital                 | 51               | 19                |
|                     | Health post              | 9                | 3.3               |
| Course of pregnancy | Complicated              | 112              | 37.2              |
|                     | Un complicated           | 189              | 62.8              |
| Place of delivery   | Health center            | 236              | 78.4              |
|                     | Hospital                 | 50               | 16.6              |
|                     | Health post              | 6                | 2.0               |
|                     | Home                     | 9                | 3.0               |
| Delivery attendant  | Health professionals     | 284              | 94.4              |
|                     | Health extension workers | 15               | 5.0               |
|                     | Others                   | 2                | 0.7               |
| Mode of delivery    | SVD                      | 254              | 84.4              |
|                     | Instrumental delivery    | 16               | 5.3               |



|                                               |             |     |      |
|-----------------------------------------------|-------------|-----|------|
|                                               | CS          | 31  | 10.3 |
| Birth outcome                                 | Live birth  | 292 | 97   |
|                                               | Still birth | 9   | 3.0  |
| Any history of neonatal death                 | Yes         | 10  | 3.3  |
|                                               | No          | 291 | 96.7 |
| Wantedness of pregnancy                       | Wanted      | 222 | 73.8 |
|                                               | Unwanted    | 79  | 26.2 |
| Getting advice on importance of PNC           | Yes         | 167 | 55.5 |
|                                               | No          | 134 | 44.5 |
| Maternal complication during postnatal period | Yes         | 55  | 18.3 |
|                                               | No          | 246 | 81.7 |
| Newborns complication during pregnancy        | Yes         | 84  | 27.9 |
|                                               | No          | 217 | 72.1 |

### Service related characteristics

Among the respondents, more than two-thirds, 190(63.1%) of the respondents were traveled by foot to the health facility, while more than two-fifths, 141(46.8%) of the respondents were decided by themselves to have early PNC. More than two-thirds, 228(75.7%) of the respondents were getting help from their husbands about health services. Of those who used the maternity waiting room, 50(16.6%) stayed for less than a week and 40(13.3%) stayed for one week (**Table 3**).

Table 3: Service related characteristics of early postnatal care services utilization among postnatal women in Wolkite town, Gurage zone, southeast Ethiopia, 2021(n=301)

| Variables                        | Category         | Frequency | Percentage |
|----------------------------------|------------------|-----------|------------|
| Means of transportation          | Foot             | 190       | 63.1       |
|                                  | Vehicles         | 111       | 36.9       |
| Decision maker on maternity care | Herself          | 141       | 46.8       |
|                                  | Husband          | 49        | 16.3       |
|                                  | Joint decision   | 111       | 36.9       |
| Getting help for health services | Husband          | 228       | 75.7       |
|                                  | Relatives        | 65        | 21.6       |
|                                  | Families         | 8         | 2.7        |
| Maternity waiting room           | Yes              | 90        | 29.9       |
|                                  | No               | 211       | 70.1       |
| Duration of stay (n=90)          | Less than a week | 50        | 55.6       |
|                                  | For one week     | 40        | 44.4       |

### Sources of knowledge about early PNC

Among the respondents, 220(70.9%) have information about EPNC. Most of the respondents, 150 (68.2%) acquired information about EPNC utilization from television. Nearly one-fifths, 81(26.9%) of the respondents have not known the advantages of postnatal care and four-fifths, 243(80.7%) of the respondents were known recommended postnatal visits. Nearly four-fifths, 256(85.0%) of the respondents did not know the correct timing of EPNC. Nearly one-half, 133 (44.2%) of the respondents knew that EPNC was a free service, and nearly two-thirds, 188(62.5%) of the respondents did not know at least one component of the service (**Table 4**).

Table 4: Knowledge about early postnatal care services utilization among postnatal women in Wolkite town, southeast Ethiopia, 2021(n=301)

| Variables                                    | Category | Frequency(n) | Percentage (%) |
|----------------------------------------------|----------|--------------|----------------|
| Know the advantages of PNC                   | Yes      | 220          | 73.1           |
|                                              | No       | 81           | 26.9           |
| Know the recommended postnatal visits        | Yes      | 58           | 19.3           |
|                                              | No       | 243          | 80.7           |
| Know the correct timing of PNC               | Yes      | 45           | 15.0           |
|                                              | No       | 256          | 85.0           |
| Knows that PNC is free service               | Yes      | 133          | 44.2           |
|                                              | No       | 168          | 55.8           |
| Knows at least one components of the service | Yes      | 113          | 37.5           |
|                                              | No       | 188          | 62.5           |
| Knows at least one newborn danger signs      | Yes      | 150          | 49.8           |
|                                              | No       | 151          | 50.2           |

|    |             |              |     |     |           |      |
|----|-------------|--------------|-----|-----|-----------|------|
| 1  |             |              |     |     |           |      |
| 2  |             |              |     |     |           |      |
| 3  | Know        | consequences | of  | not | receiving |      |
| 4  |             |              |     | Yes | 48        | 15.9 |
| 5  |             |              |     |     |           |      |
| 6  | recommended | PNC          |     | No  | 253       | 84.1 |
| 7  |             |              |     |     |           |      |
| 8  | Place       | where        | PNC | is  | delivered |      |
| 9  |             |              |     | Yes | 102       | 33.9 |
| 10 |             |              |     |     |           |      |
| 11 |             |              |     | No  | 199       | 66.1 |
| 12 |             |              |     |     |           |      |
| 13 |             |              |     |     |           |      |
| 14 |             |              |     |     |           |      |
| 15 |             |              |     |     |           |      |
| 16 |             |              |     |     |           |      |
| 17 |             |              |     |     |           |      |
| 18 |             |              |     |     |           |      |
| 19 |             |              |     |     |           |      |
| 20 |             |              |     |     |           |      |
| 21 |             |              |     |     |           |      |
| 22 |             |              |     |     |           |      |
| 23 |             |              |     |     |           |      |
| 24 |             |              |     |     |           |      |
| 25 |             |              |     |     |           |      |
| 26 |             |              |     |     |           |      |
| 27 |             |              |     |     |           |      |
| 28 |             |              |     |     |           |      |
| 29 |             |              |     |     |           |      |
| 30 |             |              |     |     |           |      |
| 31 |             |              |     |     |           |      |
| 32 |             |              |     |     |           |      |
| 33 |             |              |     |     |           |      |
| 34 |             |              |     |     |           |      |
| 35 |             |              |     |     |           |      |
| 36 |             |              |     |     |           |      |
| 37 |             |              |     |     |           |      |
| 38 |             |              |     |     |           |      |
| 39 |             |              |     |     |           |      |
| 40 |             |              |     |     |           |      |
| 41 |             |              |     |     |           |      |
| 42 |             |              |     |     |           |      |
| 43 |             |              |     |     |           |      |
| 44 |             |              |     |     |           |      |
| 45 |             |              |     |     |           |      |
| 46 |             |              |     |     |           |      |
| 47 |             |              |     |     |           |      |
| 48 |             |              |     |     |           |      |
| 49 |             |              |     |     |           |      |
| 50 |             |              |     |     |           |      |
| 51 |             |              |     |     |           |      |
| 52 |             |              |     |     |           |      |
| 53 |             |              |     |     |           |      |
| 54 |             |              |     |     |           |      |
| 55 |             |              |     |     |           |      |
| 56 |             |              |     |     |           |      |
| 57 |             |              |     |     |           |      |
| 58 |             |              |     |     |           |      |
| 59 |             |              |     |     |           |      |
| 60 |             |              |     |     |           |      |

For peer review only

### Factors associated with early postnatal care utilization

Multivariable analysis revealed that the odds of having early postnatal care utilization among mothers who had more than four pregnancies were two times (AOR: 2.90; 95%CI: 1.18, 7.11) more likely as compared with those who had one history of pregnancy. The odds of utilizing early PNC among mothers who had the desire to last pregnancy were four times (AOR: 4.17; 95%CI: 1.93, 9.03) more likely as compared with their counterparts. The odds of utilizing early PNC among mothers delivered by SVD were two times (AOR: 2.18; 95%CI: 1.07, 9.39) more likely as compared with those who delivered by CS (Table 5).

Table 5: Factors associated with early postnatal care services utilization among postnatal women in Wolkite town, southeast Ethiopia, 2021(n=301)

| Variables                              | EPNC Utilization |     | COR (95%CI)      | AOR (95%CI)             | P-value       |
|----------------------------------------|------------------|-----|------------------|-------------------------|---------------|
|                                        | Yes              | No  |                  |                         |               |
| <b>Estimated monthly income</b>        |                  |     |                  |                         |               |
| Below average                          | 43               | 106 | 1                | 1                       |               |
| >Average                               | 75               | 77  | 2.40(1.49, 3.87) | 1.22(0.67, 2.23)        | 0.517         |
| <b>Number of pregnancy (Gravidity)</b> |                  |     |                  |                         |               |
| One                                    | 31               | 88  | 1                | 1                       |               |
| 2-4                                    | 41               | 65  | 1.79(1.02, 3.15) | 1.22(0.54, 2.77)        | 0.629         |
| More than 4                            | 46               | 30  | 4.35(2.35, 8.06) | <b>2.90(1.18, 7.11)</b> | <b>0.020</b>  |
| <b>Parity</b>                          |                  |     |                  |                         |               |
| Primiparous                            | 35               | 84  | 1                | 1                       |               |
| Multiparous                            | 41               | 65  | 1.51(0.87, 2.64) | 1.18(0.51, 2.76)        | 0.699         |
| Grand Multiparous                      | 42               | 34  | 2.97(1.63, 5.40) | 1.09(0.46, 2.62)        | 0.844         |
| <b>Desire to last pregnancy</b>        |                  |     |                  |                         |               |
| Yes                                    | 103              | 119 | 3.69(1.98, 6.87) | <b>4.17(1.93, 9.03)</b> | <b>0.0001</b> |
| No                                     | 15               | 64  | 1                | 1                       |               |
| <b>Having ANC follow up</b>            |                  |     |                  |                         |               |
| Yes                                    | 111              | 157 | 2.63(1.10, 6.26) | 0.39(0.12, 1.28)        | 0.121         |
| No                                     | 7                | 26  | 1                | 1                       |               |
| <b>Course of pregnancy</b>             |                  |     |                  |                         |               |
| Complicated                            | 60               | 52  | 2.61(1.61, 4.23) | 1.57(0.85, 2.92)        | 0.151         |
| Uncomplicated                          | 58               | 131 | 1                | 1                       |               |
| <b>Mode of delivery</b>                |                  |     |                  |                         |               |
| SVD                                    | 107              | 147 | 2.38(1.04, 6.01) | <b>2.18(1.07, 9.39)</b> | <b>0.038</b>  |
| CS                                     | 11               | 36  | 1                | 1                       |               |

1  
2  
3  
4  
5  
6  
7  
8  
9  
10  
11  
12  
13  
14  
15  
16  
17  
18  
19  
20  
21  
22  
23  
24  
25  
26  
27  
28  
29  
30  
31  
32  
33  
34  
35  
36  
37  
38  
39  
40  
41  
42  
43  
44  
45  
46  
47  
48  
49  
50  
51  
52  
53  
54  
55  
56  
57  
58  
59  
60**Any newborn illness/complication**

|     |    |    |                  |                  |       |
|-----|----|----|------------------|------------------|-------|
| Yes | 42 | 42 | 1.85(1.11, 3.09) | 1.59(0.84, 2.99) | 0.155 |
|-----|----|----|------------------|------------------|-------|

|    |    |     |   |   |  |
|----|----|-----|---|---|--|
| No | 76 | 141 | 1 | 1 |  |
|----|----|-----|---|---|--|

**Obstetrics complication**

|     |    |    |                  |                   |        |
|-----|----|----|------------------|-------------------|--------|
| Yes | 41 | 14 | 6.43(1.01, 9.48) | 9.12(0.34, 12.53) | 0.0001 |
|-----|----|----|------------------|-------------------|--------|

|    |    |     |   |   |  |
|----|----|-----|---|---|--|
| No | 77 | 169 | 1 | 1 |  |
|----|----|-----|---|---|--|

**Knowledge on PNC**

|      |    |     |   |   |  |
|------|----|-----|---|---|--|
| Poor | 45 | 115 | 1 | 1 |  |
|------|----|-----|---|---|--|

|      |    |    |                  |                  |       |
|------|----|----|------------------|------------------|-------|
| Good | 73 | 68 | 2.74(1.70, 4.42) | 1.86(0.99, 3.49) | 0.051 |
|------|----|----|------------------|------------------|-------|

## Discussion

This study assessed early postnatal care services utilization and associated factors among postnatal women in Wolkite town, Gurage zone, SNNPR State, Ethiopia. We found the prevalence of early postnatal care service utilization was 23.3 % (95% CI: 18.9-27.9). The prevalence of early postnatal care services utilization in this study is lower than the study conducted in Myanmar (72.1%)<sup>(27)</sup>, Zambia (63%)<sup>(28)</sup>, Builsa district (62%)<sup>(29)</sup>, Hadiya Zone (51.4%)<sup>(30)</sup>, Uganda (50%)<sup>(8)</sup>, Assela town (37.5%)<sup>(31)</sup>, Adigrat Town (34.3%)<sup>(32)</sup> and Debremarkos town (33.5%)<sup>(33)</sup>. The variation might be due to different of the study design and setting and sociodemographic characteristics of the study participants.

However, this finding is higher than the study conducted in china (17%)<sup>(34)</sup>, Tanzania (10.4%)<sup>(35)</sup>, South Sudan (11.4%)<sup>(9)</sup>, and Debremarkos town in Ethiopia (16.2%)<sup>(36)</sup>. The differences might be due to different of the sociodemographic characteristics of the study participants. This finding indicates the importance of wanted pregnancy to gate early postnatal care follow up visits at the right time.

Women who had wanted pregnancy in a previous pregnancy were 4.17 times more likely to utilize early post-natal care when compared with counterparts. Antenatal care and institutional delivery provide the opportunity to get information about early post-natal care services utilization. This finding is similar to studies conducted in Tanzania and Benin<sup>(35, 37)</sup>. This could be explained by the various advantages of public enlightenment on planning for pregnancy. Once the pregnancy is planned and wanted, the couples may be well prepared and more likely to welcome the newborn baby with joy and communication with health care providers to have recommendations on early postnatal care services.



1  
2  
3  
4  
5 Mothers who had more than four previous pregnancies were 2 times more likely to utilize early  
6 post-natal care when compared with counterparts. This is consistent with the study conducted in  
7  
8 Debre Birhan<sup>(38)</sup> and Mekele city<sup>(39)</sup>. This indicates that former pregnancy shared experience.  
9  
10 Mothers who had SVD were three times more likely compared to those who delivered by CS.  
11  
12 This finding is consistent with the study conducted in Debre Birhan<sup>(38)</sup> and Debremarkos<sup>(33)</sup>.  
13  
14 This might be related to the knowledge acquired through frequent visits to the health facilities,  
15  
16 those mothers who gave birth by CS were stayed in their home until the healing of the cesarean  
17  
18 wound.  
19  
20  
21  
22  
23  
24  
25

## 26 **Conclusion**

27  
28 Nearly one-fourth of postnatal women utilized early postnatal care services in Wolkite town,  
29  
30 Gurage zone, SNNPR State, Ethiopia. Wanted pregnancy, had more than 4 histories of  
31  
32 pregnancy and had spontaneous vertex delivery were significantly associated with early postnatal  
33  
34 service utilization. Strengthening women's awareness on wanted pregnancy, postnatal maternal  
35  
36 and newborn complications increases women's access to early postnatal care service utilization  
37  
38 and helps to reduce maternal and newborn morbidity and mortality. Health care providers should  
39  
40 try to prove health education focus their efforts on increasing early postnatal care service  
41  
42 utilization in those who may not have wanted to be pregnant, those who have their first  
43  
44 pregnancy, and those who deliver by cesarean section.  
45  
46  
47  
48

49 Policy makers' strategy should focus on maternal health care on wanted pregnancy to improve  
50  
51 early postnatal care services utilization.  
52  
53  
54  
55  
56  
57  
58  
59  
60

## Patient consent for publication

Not required.

## Availability of Data and Materials

The datasets generated and/or analyzed during the current study are not publicly available

## Competing interests

The authors declare that they have no competing interests

## Ethical Approval and Consent to Participants

The ethical clearance was obtained from the institutional review board (IRB) of Wolkite University College of Health Science and Medicine with reference number RCSUILC/021/2021.

Written informed consent was obtained from all study participants before the study; because this study has no potential harm or doesn't breach the confidentiality of the participants and approved by IRB of Wolkite University.

They were also informed about the possibility to refuse participation at any time of data collection. Confidentiality of the data was assured and kept; code number was assigned to the study participants without mentioning the name, the information that was collected for the study was kept in a file, and locked with a key.

## Author Contributions

**Planning:** Yirgalem Yosef Lamiso, Mebratu Demissie Senbeta, Seblework Abeje Abiy, Mariama Shifa Mohamed

**Methodology:** Yirgalem Yosef Lamiso, Mebratu Demissie Senbeta , Seblework Abeje Abiy

**Data curation:** Fantahun Walle Berriera, Shegaw Geze Tenaw, Aberash Beyene Deribew,

**Formal analysis:** Yirgalem Yosef Lamiso, Mebratu Demissie Senbeta , Seblework Abeje Abiy

**Investigation:** Yirgalem Yosef Lamiso, Mebratu Demissie Senbeta , Seblework Abeje Abiy

1  
2  
3 **Software:** Yirgalem Yosef Lamiso, Mebratu Demissie Senbeta  
4

5 **Supervision:** Fantahun Walle Berriera, Shegaw Geze Tenaw, Aberash Beyene Deribew  
6

7 **Validation:** Yirgalem Yosef Lamiso Mebratu Demissie Senbeta , Seblework Abeje Abiy  
8  
9

10 **Visualization:** Mebratu Demissie Senbeta, Seblework Abeje Abiy, Shegaw Geze Tenaw  
11

12 **Writing – review & editing:** Yirgalem Yosef Lamiso Mebratu Demissie Senbeta  
13  
14

## 15 16 17 **Acknowledgments** 18

19 We would like to thank Wolkite University for granting ethical approval, Wolkite town  
20 administrator, study participants, and data collectors.  
21  
22

## 23 24 **Funding** 25

26 The authors have not declared a specific grant for this research from any funding agency in the  
27 public, commercial or not-for-profit sectors.  
28  
29  
30  
31  
32  
33  
34  
35  
36  
37  
38  
39  
40  
41  
42  
43  
44  
45  
46  
47  
48  
49  
50  
51  
52  
53  
54  
55  
56  
57  
58  
59  
60

## References

1. WHO. Trends in maternal mortality 2018 [Available from: <https://documents1.worldbank.org/curated/en/793971568908763231/pdf/Trends-in-maternal-mortality-2000-to-2017-Estimates-by-WHO-UNICEF-UNFPA-World-Bank-Group-and-the-United-Nations-Population-Division.pdf>].
2. WHO. WHO recommendations on Postnatal care of the mother and newborn. 2014.
3. Yaya S, Ghose B. Global Inequality in Maternal Health Care Service Utilization: Implications for Sustainable Development Goals. *Health Equity*. 2019;3(1):145-54.
4. WHO U, UNFPA, World Bank Group and the United Nations Population Division. Trends in maternal mortality: 1990 to 2015. Estimates by WHO, UNICEF, UNFPA, World Bank Group and the United Nations Population Division. Geneva; 2015.
5. Organization WH. Health in 2015: from MDGs, millennium development goals to SDGs, sustainable development goals. 2015.
6. WHO. Postnatal Care for Mothers and Newborns Highlights from the World Health Organization 2013 Guidelines. 2015.
7. Kassa GM. Mother-to-child transmission of HIV infection and its associated factors in Ethiopia: a systematic review and meta-analysis. *BMC Infect Dis*. 2018;18(1):216.
8. USAIDS. Determinants of Early Postnatal Care Attendance in Uganda. 2016.
9. Izudi J, Akwang GD, Amongin D. Early postnatal care use by postpartum mothers in Mundri East County, South Sudan. *BMC Health Services Research*. 2017;17(1).
10. Yoseph S, Dache A, Dona A. Prevalence of Early Postnatal-Care Service Utilization and Its Associated Factors among Mothers in Hawassa Zuria District, Sidama Regional State, Ethiopia: A Cross-Sectional Study. 2021.
11. Tefera Y, Hailu S, Tilahun aR. Early postnatal care service utilization and its determinants among women who gave birth in the last 6 months in wonago district, south ethiopia: A community-based cross-sectional study. 2020.
12. Gebreslassie T, Gebrehiwot, Mekonen HH. Prevalence and Associated Factors of Early Postnatal Care Service Use Among Mothers Who Had Given Birth Within the Last 12 Months in Adigrat Town, Tigray, Northern Ethiopia,. 2018.

- 1  
2  
3 13. WHO. WHO Technical Consultation on Postpartum and Postnatal Care Geneva ,  
4 Switzerland2010 [Available from:  
5 [http://apps.who.int/iris/bitstream/handle/10665/70432/WHO\\_MPS\\_10.03\\_eng.pdf;jsessio](http://apps.who.int/iris/bitstream/handle/10665/70432/WHO_MPS_10.03_eng.pdf;jsessionid=977EC87BBE162C1694EBAB559E4D335A?sequence=1)  
6 [nid=977EC87BBE162C1694EBAB559E4D335A?sequence=1](http://apps.who.int/iris/bitstream/handle/10665/70432/WHO_MPS_10.03_eng.pdf;jsessionid=977EC87BBE162C1694EBAB559E4D335A?sequence=1).  
7  
8  
9
- 10 14. Collaboration Ct. Countdown to 2030: tracking progress towards universal coverage for  
11 reproductive, maternal, newborn, and child health. The Lancet. 2018.  
12
- 13 15. UNICEF. Maternal and Newborn Health Disparities in Ethiopia,unicef for every child  
14 2017 [Available from: [https://data.unicef.org/wp-](https://data.unicef.org/wp-content/uploads/country_profiles/Ethiopia/country%20profile_ETH.pdf)  
15 [content/uploads/country\\_profiles/Ethiopia/country%20profile\\_ETH.pdf](https://data.unicef.org/wp-content/uploads/country_profiles/Ethiopia/country%20profile_ETH.pdf).  
16  
17
- 18 16. CSAE. Central statistics agency of Ethiopia, Ethiopia Demographic and Health Survey  
19 2016. Addis Ababa, Ethiopia, and Rockville, Maryland, USA: CSA and ICF.  
20 Ethiopia2016 [cited 2018. Available from:  
21 <https://dhsprogram.com/pubs/pdf/FR328/FR328.pdf>.  
22  
23
- 24 17. WHO. global strategies for women's,children and adolescent(2016-2030) 2016 [  
25  
26
- 27 18. Darmstadt GL, Bhutta ZA, Cousens S, Adam T, Walker N, De Bernis L, et al. Evidence-  
28 based, cost-effective interventions: how many newborn babies can we save? The Lancet.  
29 2005;365(9463):977-88.  
30  
31
- 32 19. WHO/UNICEF. Home visits for the newborn child:a strategy to improve survival 2010  
33 [Available from:  
34 [http://apps.who.int/iris/bitstream/handle/10665/70002/WHO\\_FCH\\_CAH\\_09.02\\_eng.pdf?](http://apps.who.int/iris/bitstream/handle/10665/70002/WHO_FCH_CAH_09.02_eng.pdf?sequence=1)  
35 [sequence=1](http://apps.who.int/iris/bitstream/handle/10665/70002/WHO_FCH_CAH_09.02_eng.pdf?sequence=1).  
36  
37  
38
- 39 20. DiBari JN, Yu SM, Chao SM, Lu MC. Use of postpartum care: predictors and barriers.  
40 Journal of pregnancy. 2014;2014.  
41  
42
- 43 21. Organization WH. Every newborn: an action plan to end preventable deaths. 2014.  
44
- 45 22. WHO. WHO recommendations on maternal health: guidelines approved by the WHO  
46 Guidelines Review Committee Geneva: 2017 [updated 2017. Available from:  
47 [http://apps.who.int/iris/bitstream/handle/10665/259268/WHO-MCA-17.10-](http://apps.who.int/iris/bitstream/handle/10665/259268/WHO-MCA-17.10-eng.pdf?sequence=1)  
48 [eng.pdf?sequence=1](http://apps.who.int/iris/bitstream/handle/10665/259268/WHO-MCA-17.10-eng.pdf?sequence=1).  
49  
50
- 51 23. WHO. Technical Consultation on Postpartum and Postnatal Care. 2010.  
52  
53  
54  
55  
56  
57  
58  
59  
60

- 1
  - 2
  - 3
  - 4
  - 5
  - 6
  - 7
  - 8
  - 9
  - 10
  - 11
  - 12
  - 13
  - 14
  - 15
  - 16
  - 17
  - 18
  - 19
  - 20
  - 21
  - 22
  - 23
  - 24
  - 25
  - 26
  - 27
  - 28
  - 29
  - 30
  - 31
  - 32
  - 33
  - 34
  - 35
  - 36
  - 37
  - 38
  - 39
  - 40
  - 41
  - 42
  - 43
  - 44
  - 45
  - 46
  - 47
  - 48
  - 49
  - 50
  - 51
  - 52
  - 53
  - 54
  - 55
  - 56
  - 57
  - 58
  - 59
  - 60
24. Ndugga P, Namiyonga NK, Sebuwufu D. Determinants of early postnatal care attendance: analysis of the 2016 Uganda demographic and health survey. *BMC Pregnancy and Childbirth*. 2020;20(1).
25. An T, D N, A T. Early Postnatal Care Service Utilization and Associated Factors among Mothers Who Gave Birth in the Last 12 Months in Aseko District, Arsi Zone, South East Ethiopia in 2016. *Journal of Women's Health Care*. 2017;06(01).
26. EDHS. Ethiopia demographic and health survey 2016.
27. Mon AS, Phyu MK, Thinkhamrop W, Thinkhamrop B. women and its determinants: a cross-sectional study. 2018.
28. Chungu C, Makasa M, Chola M, Jacobs CN. Place of Delivery Associated With Postnatal Care Utilization Among Childbearing Women in Zambia. *Frontiers in Public Health*. 2018;6(94).
29. Sakeah E, Aborigo R, Sakeah JK, Dalaba M, Kanyomse E, Azongo D, et al. The role of community-based health services in influencing postnatal care visits in the Builsa and the West Mamprusi districts in rural Ghana. *BMC pregnancy and childbirth*. 2018;18(1):295.
30. Belachew T, Taye A, Belachew T. Postnatal care service utilization and associated factors among mothers in Lemo Woreda, Ethiopia. *J Women's Health Care*. 2016;5(10.4172):2167-0420.1000318.
31. Amane Tumbure1 DA, Elile Fantahun1, Megersa Negusu1, Tsegaw Yitbarek1, Legese Tadesse2\* and Tewodros Desalegn2 Assessment of Postnatal Care Service Utilization and Associated Factors in Asella Town, Arsi Zone, Oromiya Regional State, Ethiopia. *Global Journal of Reproductive medicine*. 2018;6(1).
32. Gebreslassie T, Haftea G, Mekonen H. Prevalence and Associated Factors of Early Postnatal Care Service Use Among Mothers Who Had Given Birth Within the Last 12 Months in Adigrat Town, Tigray, Northern Ethiopia,. 2018.
33. Limenih MA, Endale ZM, Dachew BA. Postnatal Care Service Utilization and Associated Factors among Women Who Gave Birth in the Last 12 Months prior to the Study in Debre Markos Town, Northwestern Ethiopia: A Community-Based Cross-Sectional Study. *International Journal of Reproductive Medicine*. 2016;2016:1-7.
34. You H, Chen J, Bogg L, Wu Y, Duan S, Ye C, et al. Study on the factors associated with postpartum visits in rural China. *PLoS One*. 2013;8(2):e55955.

- 1
- 2
- 3
- 4 35. Kanté AM, Chung CE, Larsen AM, Exavery A, Tani K, Phillips JF. Factors associated
- 5 with compliance with the recommended frequency of postnatal care services in three
- 6 rural districts of Tanzania. *BMC pregnancy and childbirth*. 2015;15(1):341.
- 7
- 8 36. Limenih MA, Endale ZM, Dachew BA. Postnatal Care Service Utilization and
- 9 Associated Factors among Women Who Gave Birth in the Last 12 Months prior to the
- 10 Study in Debre Markos Town, Northwestern Ethiopia: A Community-Based Cross-
- 11 Sectional Study. *International Journal of Reproductive Medicine*. 2016;2016:7.
- 12
- 13 37. Dansou J, Adekunle AO, Arowojolu AO. Factors associated with the compliance of
- 14 recommended first postnatal care services utilization among reproductive age women in
- 15 Benin Republic: an analysis of 2011/2012 BDHS data. *International Journal of*
- 16 *Reproduction, Contraception, Obstetrics and Gynecology*. 2017;6(4):1161-9.
- 17
- 18 38. Akibu M, Tsegaye W, Megersa T, Nurgi S. Prevalence and Determinants of Complete
- 19 Postnatal Care Service Utilization in Northern Shoa, Ethiopia. *Journal of pregnancy*.
- 20 2018;2018.
- 21
- 22 39. Gebrehiwot G, Medhanyie AA, Gidey G, Abrha K. Postnatal care utilization among
- 23 urban women in northern Ethiopia: cross-sectional survey. *BMC women's health*.
- 24 2018;18(1):78.
- 25
- 26
- 27
- 28
- 29
- 30
- 31
- 32
- 33
- 34

### Legends:

35

36

37

38 Figure 1: Types of maternal complication among postnatal women in Wolkite town, southeast

39 Ethiopia, 2021(n=301)

40

41

42 Figure 2: Types of newborn complications during postnatal period among postnatal women in

43 Wolkite town, southeast Ethiopia, Ethiopia, 2021(n=301)

44

45

46

47

48 Annex 1: English version interviewer administered questionnaire on early postnatal care

49 services utilization among postnatal women in southeast Ethiopia, 2021.

50

51

52

53

54

55

56

57

58

59

60

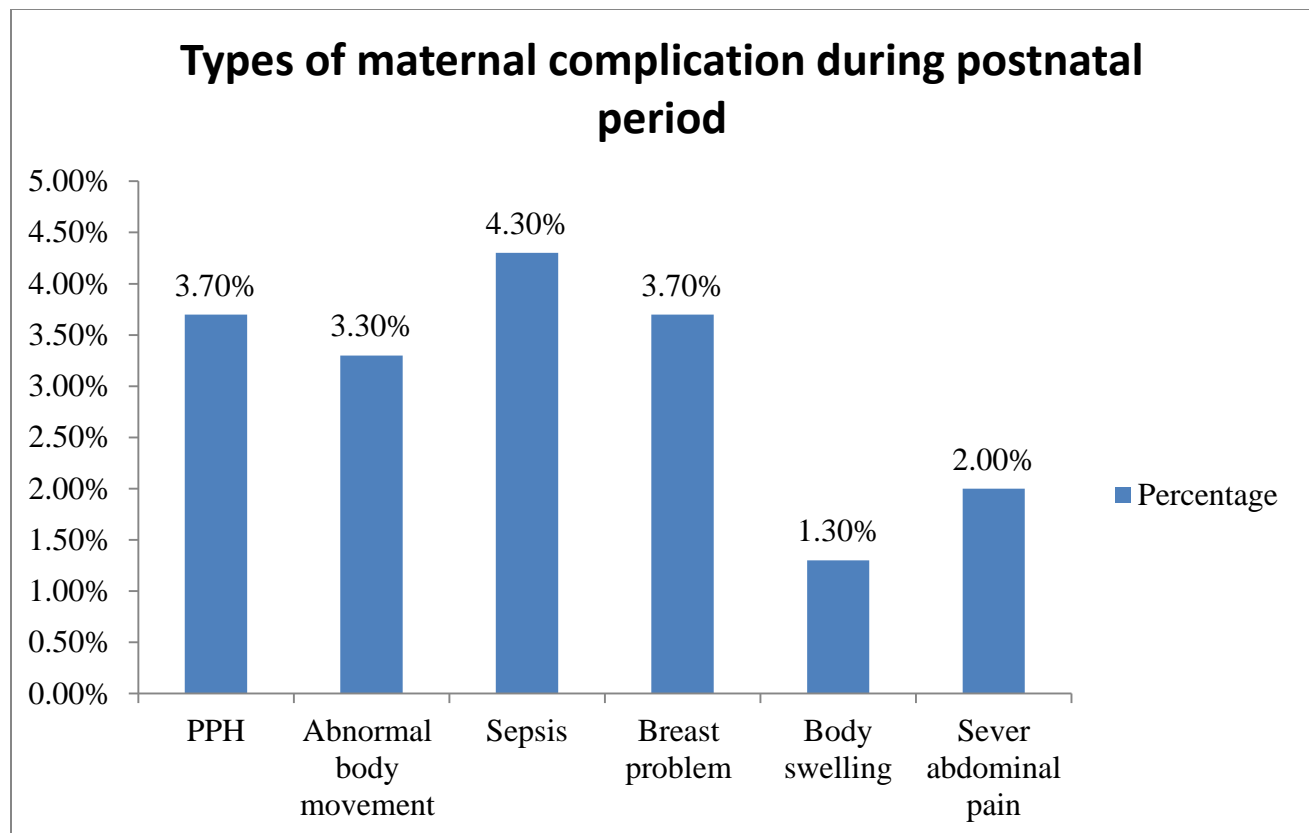

31  
32  
33  
34  
35  
36  
37  
38  
39  
40  
41  
42  
43  
44  
45  
46  
47  
48  
49  
50  
51  
52  
53  
54  
55  
56  
57  
58  
59  
60

Figure 1: Types of maternal complication among postnatal women in Wolkite town, Southeast, Ethiopia, 2021(n=301)



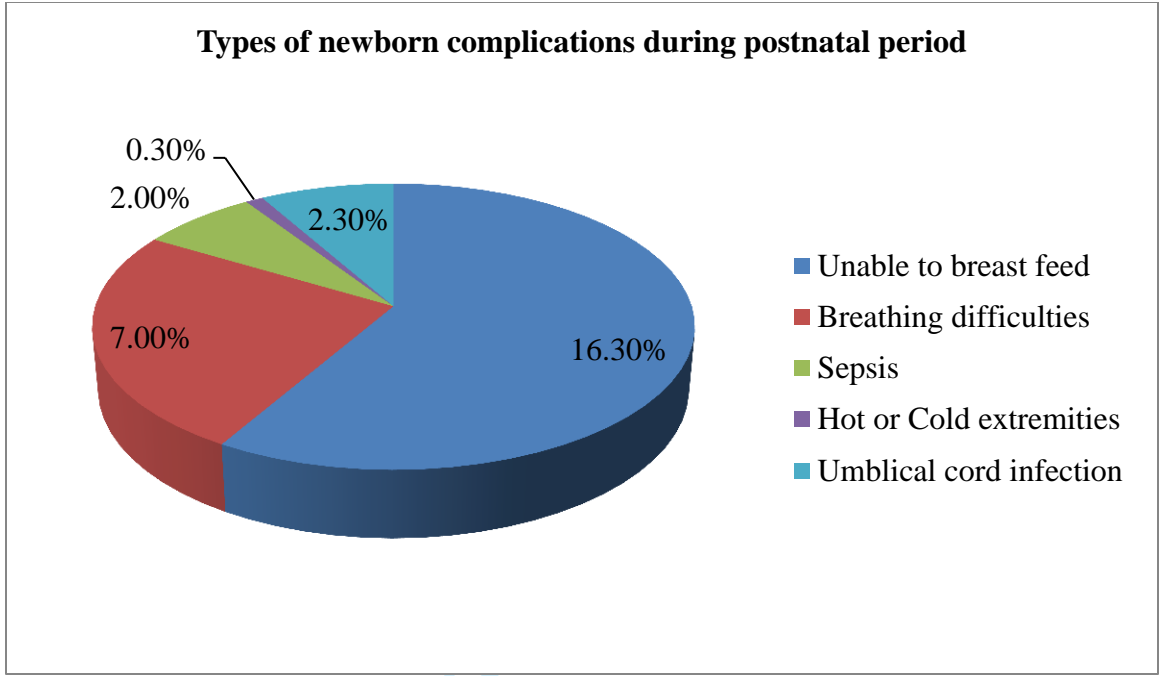

Figure 2: Types of newborn complications during postnatal period among postnatal women in Wolkite town, southeast Ethiopia, 2021(n=301)

## APPENDICES

**Annex 1: English version Interviewer Administered Questionnaire****Consent form for postnatal women:**

Title of research: Prevalence of early postnatal care utilization and associated factors among postnatal women in Wolkite town, Gurage zone, Southern Ethiopia, 2021

Hello my name is----- . I am working as data collector in the research conducted by Yirgalem Yosef. The research is only for academic purposes. I assure you that the views expressed in this questionnaire will under no circumstance be made public or disclosed to a third party. The details of this interview and the information you provide will be held in confidence.

**Declaration by Respondent**

I certify that I voluntarily agree to answer the research questions, that the study has been explained to me. All my questions have been answered satisfactorily. I understand I am free to discontinue participation at any time if I so choose.

.....

Signature

Date.....

**Researcher's Statement**

I certify that the participant has been given ample time to read, learn and understand the study. All questions and clarifications raised by the participant have been addressed.

.....

Yirgalem Yosef (Researcher)

Date.....

**Instruction:** Please **Circle the appropriate answer** in space provided

Questionnaire Code\_\_\_\_\_

**SECTION 1: Socio demographic characteristics**

| S.N | Questions                   | Answers                                                                                         | Skip |
|-----|-----------------------------|-------------------------------------------------------------------------------------------------|------|
| 101 | Age (in years)              | 1. [ _____ ]<br>2. I don't know-----                                                            |      |
| 102 | Current marital status      | 1. Married<br>2. Divorced /Separated<br>3. un married<br>4. Widowed                             |      |
| 103 | Religion                    | 1. Orthodox<br>2. Muslim<br>3. Catholic<br>4. Protestant<br>5. Others                           |      |
| 104 | Ethnicity                   | 1. Gurage<br>2. Amhara<br>3. Oromo<br>4. Others.                                                |      |
| 105 | Education status            | 1. No formal Education<br>2. 1-8 <sup>th</sup><br>3. 9-12 <sup>th</sup><br>4. College and above |      |
| 106 | Occupational status         | 1. House wife<br>2. Civil servant<br>3. Merchant<br>4. Daily labour<br>5. Farmer                |      |
| 107 | Husbands educational status | 1. No formal Education<br>2. 1-8 <sup>th</sup><br>3. 9-12 <sup>th</sup><br>4. College and above |      |

|                                                            |                          |                                                                                                                                     |             |
|------------------------------------------------------------|--------------------------|-------------------------------------------------------------------------------------------------------------------------------------|-------------|
| 108                                                        | Husbands occupations     | <ol style="list-style-type: none"> <li>1. Farmer</li> <li>2. Civil servant</li> <li>3. Merchant</li> <li>4. Daily labour</li> </ol> |             |
| 109                                                        | Estimated monthly income | <ol style="list-style-type: none"> <li>1. below average(597.4 ETB)</li> <li>2. More than average (597.4 ETB)</li> </ol>             |             |
| 110                                                        | Family size              | <ol style="list-style-type: none"> <li>1. less than average (4)</li> <li>2. more than average (4)</li> </ol>                        |             |
| <b>Section two: obstetric and neonatal characteristics</b> |                          |                                                                                                                                     | <b>Code</b> |
| 201                                                        | Gravidity                | -----                                                                                                                               |             |
| 202                                                        | Parity                   | -----                                                                                                                               |             |
| 203                                                        | Having ANC visit         | <ol style="list-style-type: none"> <li>1. Yes</li> <li>2. No</li> </ol>                                                             |             |
| 204                                                        | Number of ANC Visits     | <ol style="list-style-type: none"> <li>1. one</li> <li>2. two</li> <li>3. Three</li> <li>4. Four and above</li> </ol>               |             |
| 205                                                        | Place of last ANC visit  | <ol style="list-style-type: none"> <li>1. Health center</li> <li>2. Hospital</li> <li>3. Health post</li> </ol>                     |             |
| 206                                                        | Course of pregnancy      | <ol style="list-style-type: none"> <li>1. Complicated</li> <li>2. Uncomplicated</li> </ol>                                          |             |
| 207                                                        | Place of delivery        | <ol style="list-style-type: none"> <li>1. Health center</li> <li>2. Hospital</li> <li>3. 3. Health post</li> <li>4. Home</li> </ol> |             |
| 208                                                        | Delivery Attendant       | <ol style="list-style-type: none"> <li>1. Health professionals</li> <li>2. Health extension workers</li> <li>3. Other</li> </ol>    |             |
| 209                                                        | Mode of delivery         | <ol style="list-style-type: none"> <li>1. SVD</li> </ol>                                                                            |             |

|                                                                                          |                                            |                                               |               |
|------------------------------------------------------------------------------------------|--------------------------------------------|-----------------------------------------------|---------------|
|                                                                                          |                                            | 2. Instrumental delivery<br>3. CS             |               |
| 210                                                                                      | Birth outcome                              | 1. Live birth<br>2. Still birth               |               |
| 211                                                                                      | Any history of Neonatal death              | 1. Yes<br>2. No                               |               |
| 212                                                                                      | Wantedness of pregnancy                    | 1. Wanted<br>2. Unwanted                      |               |
| 213                                                                                      | Have you got advices on Importance of PNC? | 1. Yes<br>2. No                               |               |
| 214                                                                                      | New born complication during pregnancy     | 1. Yes<br>2. No                               |               |
| <b>Section three : Health service related factors (access to skilled maternity care)</b> |                                            |                                               | <b>Code</b>   |
| 301                                                                                      | Means of transportation                    | 1. Foot<br>1. Vehicle                         |               |
| 302                                                                                      | Decision maker on maternity care           | 1. Herself<br>2. Husband<br>3. Joint decision |               |
| 303                                                                                      | Getting help for health services           | 1. Husband<br>2. Relatives<br>3. Families     |               |
| 304                                                                                      | Using Maternity waiting room               | 1. Yes<br>2. No                               | If yes<br>305 |
| 305                                                                                      | Duration of stay                           | 1. Less than a week<br>2. For one week        |               |
| <b>Section four: knowledge of mothers towards early PNC service</b>                      |                                            |                                               | <b>Code</b>   |
| 401                                                                                      | Knows advantages of PNC                    | 1. Yes<br>1. No                               |               |
| 402                                                                                      | Knows Recommended PNC                      | 2. Yes<br>3. No                               |               |

|     |                                                    |                 |  |
|-----|----------------------------------------------------|-----------------|--|
| 403 | Know the correct timing of PNC                     | 1. Yes<br>2. No |  |
| 404 | Knows that PNC is free services                    | 1. Yes<br>1. No |  |
| 405 | Knows at least one component of the services       | 1. Yes<br>2. No |  |
| 406 | Knows at least on newborn danger sign              | 1. Yes<br>2. No |  |
| 407 | know consequences of not receiving recommended PNC | 1. Yes<br>2. No |  |
| 408 | Know place where PNC is delivered                  | 1. Yes<br>2. No |  |

**THANK YOU VERY MUCH!!!!!!**

# BMJ Open

## Prevalence of early postnatal care services utilization and associated factors among postnatal women of Wolkite town, Gurage zone, Southern Ethiopia: a community-based cross-sectional study

|                                 |                                                                                                                                                                                                                                                                                                                                                                                                                                                                                                                                                                                                                                                                      |
|---------------------------------|----------------------------------------------------------------------------------------------------------------------------------------------------------------------------------------------------------------------------------------------------------------------------------------------------------------------------------------------------------------------------------------------------------------------------------------------------------------------------------------------------------------------------------------------------------------------------------------------------------------------------------------------------------------------|
| Journal:                        | <i>BMJ Open</i>                                                                                                                                                                                                                                                                                                                                                                                                                                                                                                                                                                                                                                                      |
| Manuscript ID                   | bmjopen-2022-061326.R1                                                                                                                                                                                                                                                                                                                                                                                                                                                                                                                                                                                                                                               |
| Article Type:                   | Original research                                                                                                                                                                                                                                                                                                                                                                                                                                                                                                                                                                                                                                                    |
| Date Submitted by the Author:   | 07-Jun-2022                                                                                                                                                                                                                                                                                                                                                                                                                                                                                                                                                                                                                                                          |
| Complete List of Authors:       | Lamiso, Yirgalem; Wolkite University, College of Health Science, Department of Midwifery<br>Senbeta, Mebratu; Wolkite University, College of Health Science, Midwifery<br>Abeje, Seblework ; Wolkite University, College of Health Science, Department of Medical Biochemistry<br>Walle, Fantahun; Wolkite University, College of Health Science, Department of Nursing<br>Tenaw, Shegaw Geze; Wolkite University, College of Health Science, Department of Midwifery<br>Derribow, Aberash; Wolkite University, College of Health Science, Department of Midwifery<br>Mohamed, Mariama Shifa; Wolkite University, College of Health Science, Department of Midwifery |
| <b>Primary Subject Heading</b>: | Health services research                                                                                                                                                                                                                                                                                                                                                                                                                                                                                                                                                                                                                                             |
| Secondary Subject Heading:      | Health services research, Obstetrics and gynaecology, Health policy                                                                                                                                                                                                                                                                                                                                                                                                                                                                                                                                                                                                  |
| Keywords:                       | OBSTETRICS, HEALTH SERVICES ADMINISTRATION & MANAGEMENT, HISTORY (see Medical History), Gynaecological oncology < GYNAECOLOGY, Health & safety < HEALTH SERVICES ADMINISTRATION & MANAGEMENT, Health policy < HEALTH SERVICES ADMINISTRATION & MANAGEMENT                                                                                                                                                                                                                                                                                                                                                                                                            |
|                                 |                                                                                                                                                                                                                                                                                                                                                                                                                                                                                                                                                                                                                                                                      |

SCHOLARONE™  
Manuscripts

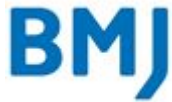

I, the Submitting Author has the right to grant and does grant on behalf of all authors of the Work (as defined in the below author licence), an exclusive licence and/or a non-exclusive licence for contributions from authors who are: i) UK Crown employees; ii) where BMJ has agreed a CC-BY licence shall apply, and/or iii) in accordance with the terms applicable for US Federal Government officers or employees acting as part of their official duties; on a worldwide, perpetual, irrevocable, royalty-free basis to BMJ Publishing Group Ltd ("BMJ") its licensees and where the relevant Journal is co-owned by BMJ to the co-owners of the Journal, to publish the Work in this journal and any other BMJ products and to exploit all rights, as set out in our [licence](#).

The Submitting Author accepts and understands that any supply made under these terms is made by BMJ to the Submitting Author unless you are acting as an employee on behalf of your employer or a postgraduate student of an affiliated institution which is paying any applicable article publishing charge ("APC") for Open Access articles. Where the Submitting Author wishes to make the Work available on an Open Access basis (and intends to pay the relevant APC), the terms of reuse of such Open Access shall be governed by a Creative Commons licence – details of these licences and which [Creative Commons](#) licence will apply to this Work are set out in our licence referred to above.

Other than as permitted in any relevant BMJ Author's Self Archiving Policies, I confirm this Work has not been accepted for publication elsewhere, is not being considered for publication elsewhere and does not duplicate material already published. I confirm all authors consent to publication of this Work and authorise the granting of this licence.



1  
2  
3 **Prevalence of early postnatal care services utilization and associated factors**  
4  
5  
6 **among postnatal women of Wolkite town, Gurage zone, Southern Ethiopia: a**  
7  
8 **community-based cross-sectional study**  
9

10  
11 Yirgalem Yosef Lamiso\*<sup>1</sup>, Mebratu Demissie Senbata<sup>1</sup>, Seblework Abeje Abiy<sup>2</sup>, Fantahun Walle  
12  
13 Berriera<sup>3</sup>, Shegaw Geze Tenaw<sup>1</sup>, Aberash Beyene Derribow<sup>1</sup>, Mariama Shifa Mohamed<sup>1</sup>  
14

15  
16 <sup>1</sup>Department of Midwifery, College of Medicine and Health Sciences, Wolkite University,  
17  
18 Wolkite, Ethiopia  
19

20  
21 <sup>2</sup>Department of Biochemistry, College of Medicine and Health Sciences, Wolkite University,  
22  
23 Wolkite, Ethiopia  
24

25  
26 <sup>3</sup>Department of Nursing, College of Medicine and Health Sciences, Wolkite University, Wolkite,  
27  
28 Ethiopia  
29

30  
31 \*Correspondence: Department of midwifery, College of Medicine and Health Sciences, Wolkite  
32  
33 University, Wolkite, Ethiopia; [Yirgalem.yosef@wku.edu.et](mailto:Yirgalem.yosef@wku.edu.et)

34 **Authors' address**  
35

- 36  
37  
38 1. Yirgalem Yosef Lamiso (YYL): [Yirgalem.yosef@wku.edu.et](mailto:Yirgalem.yosef@wku.edu.et)  
39  
40 2. Mebratu Demissie Senbata (MDS): [mebredemis21@gmail.com](mailto:mebredemis21@gmail.com)  
41  
42 3. Seblework abeje Abiy (SAA): [Seblework.abeje@wku.edu.et](mailto:Seblework.abeje@wku.edu.et)  
43  
44 4. Fantahun Walle Berriera (FWB): [Fantahunwalle@gmail.com](mailto:Fantahunwalle@gmail.com)  
45  
46 5. Shegaw Geze Tenaw (SGT): [shagaw.geze@gmail.com](mailto:shagaw.geze@gmail.com)  
47  
48 6. Aberash Beyene Derribow(ABD): [aberashbey217@gmail.com](mailto:aberashbey217@gmail.com)  
49  
50 7. Mariama Shifa Mohamed(MSM) : [daarra16@gmail.com](mailto:daarra16@gmail.com)  
51  
52  
53  
54  
55  
56  
57  
58  
59  
60

## ABSTRACT

**Objective:** In developing countries, early postnatal care service utilization is one of the health care service utilization problems, which is related to extensive maternal and neonatal morbidity and mortality. Identification of the factors associated with early postnatal care services utilization is vital to developing intervention measures to mitigate their public health impact. Thus, this study aimed to assess the prevalence of early postnatal care services utilization and associated factors among postnatal women of Wolkite town, southeast Ethiopia.

**Design:** A community-based cross-sectional study design was conducted among 301 postnatal women from 15 May to 15 June 2021.

**Measurements:** Data were collected using a pretested structured questionnaire. The collected data were cleaned and entered into Epidata3.1 and then exported to SPSS version 23 for analysis. Finally, a multivariate logistic regression model was fitted to identify the factors associated with early postnatal care utilization. The p-value  $<0.05$  was considered statistically significant.

**Results:** The finding showed that the prevalence of early postnatal care services utilization was 23.3% (95% CI: 18.9 to 27.9). Wanted pregnancy (AOR=4.17, 95%CI 1.93 to 9.03), having more than four previous pregnancies (AOR=2.90, 95%CI 1.18 to 7.11), and having spontaneous vertex delivery (AOR=2.18, 95%CI 1.07 to 9.39) were statistically significant factors of early postnatal care service utilization.

**Conclusion:** The study has shown that the prevalence of early postnatal care services utilization is found to be slightly low when compared to other studies. Thus, community-based health promotion should be provided on the importance of postnatal care checkups; done by health care professionals.

**Keywords:** Early postnatal care, Utilization, Southern Ethiopia

## Strength and Limitations of this study

- ✚ The strengths of this study were it's being a community-based study and that the prevalence of early PNC utilization and associated factors were compared with other studies.
- ✚ The limitation of this study related to the survey types and nature of the cross-sectional study which did not draw inferences and show cause and effect relations among variables.
- ✚ The sample size of this study was small, even if it was scientifically calculated.
- ✚ The study is further limited by the fact that it is based on retrospective information provided by the survey respondents, which may be subject to recall bias.
- ✚ However, such bias was tried to minimize some extent by restricting the study to mothers with birth within one year of the survey.

## INTRODUCTION

Globally, approximately 810 women die every day from preventable causes related to pregnancy and childbirth complications, 94% of women's death occur in low and middle-income countries.<sup>1</sup>

According to the world health organization (WHO) report, more than 60% of global maternal deaths occur in the postpartum period.<sup>2</sup> Three-fourths of maternal mortality occurred within the first week of delivery.<sup>3</sup> The first six weeks (42days) after giving birth is known as the postpartum period.<sup>4,5</sup> The first week (7 days) is an intense time and requires all sorts of care for women and newborn babies. Early postnatal care refers to health care services provided to mother and newborn baby by healthcare professionals within the first weeks after giving birth.<sup>2,6</sup>

Globally, 30% of mothers follow postnatal care, thus 13% of the postnatal follow-up in sub-Saharan Africa.<sup>7</sup> Research findings also showed that the prevalence of early postnatal care utilization varied to a certain extent among regions in Africa. For instance, in Uganda,<sup>8</sup> and South Sudan,<sup>9</sup> reported 15.4% and 11.4%, respectively. Variations were also noted in research conducted in Ethiopia, like Southern Ethiopia at Hawassa Zuria,<sup>10</sup> and Wonango District,<sup>11</sup> North Ethiopia,<sup>12</sup> reported 29.7%,13.7%, and 34.3%, respectively.

Globally, every year three million infants die in the first week of life, and 900 000 die in the next three weeks.<sup>13,14</sup> According to a united nations international children's emergency fund (UNICEF) report in Ethiopia, nearly 240 babies will die each day before reaching their first month of life.<sup>15</sup> The Ethiopian demographic and health survey( EDHS) 2019 report, revealed that the neonatal mortality rate (NMR) of the country is 29 deaths per 1,000 live births,<sup>16,17</sup> neonatal deaths occur at birth and early postnatal period due to inadequacy of care.<sup>18,19</sup>

In developing countries, different factors decrease early postnatal care services utilization like home delivery, illiteracy, low income, and cultures.<sup>20,21</sup> This makes the early postnatal care

1  
2  
3 services program the weakest of all reproductive and child health programs. As a result of low  
4 adherence to recommended postnatal care (PNC) regimens, women in sub-Saharan Africa posed  
5 a significant risk of infant and maternal morbidities and mortality.<sup>22</sup>  
6  
7

8  
9  
10 Despite the establishment of several global and national initiatives to improve maternally and  
11 child health, maternal mortalities and mortality is continued as a global challenge.<sup>4</sup> Early  
12 postnatal care service is the most important maternal and child health care service to detect early  
13 maternal and newborn danger signs and complications by health care providers.<sup>23</sup>  
14  
15

16  
17 Identification of the prevalence of early postnatal care services utilization and associated factors  
18 among postnatal women is imperative to develop intervention measures to mitigate their  
19 complications and public health impact. However, the prevalence of early postnatal care services  
20 utilization and associated factors among postnatal women were not well known in Ethiopia,  
21 particularly in the selected study area. Thus, this study aimed to assess the prevalence of early  
22 postnatal care services utilization and associated factors among postnatal women of Wolkite  
23 town.  
24  
25  
26  
27  
28  
29  
30  
31  
32  
33  
34  
35  
36  
37  
38  
39  
40  
41  
42  
43  
44  
45  
46  
47  
48  
49  
50  
51  
52  
53  
54  
55  
56  
57  
58  
59  
60

## METHODS AND MATERIALS

### Study design and setting

A community-based cross-sectional study design was conducted from 15 May to 15 June 2021, at Wolkite Town, southern Ethiopia. Wolkite is the capital city of the Gurage zone. Wolkite town is located 158 km southwest of Addis Ababa, the capital city of Ethiopia. According to the 2007 Census conducted by the Central Statistical Agency of Ethiopia, Wolkite town has a total population of 28,856 of whom 15,068 were males and 13,788 females (24) residents served by one public hospital, three health centers, and nine private clinics.

### Source and study population

Postnatal mothers aged 18 years and above who had birth within the last 12 months and lived more than six months in the town selected from sub-cities were the source and study populations, respectively. Individuals who had birth more than 12 months and were critically ill during the data collection period were excluded from the study.

### Study variables and data measurement

The dependent variable was early postnatal care utilization. Independent variables were as follows: socio-demographic characteristics (Age, Marital status, religion, ethnicity, educational level, occupational status, Husbands educational status, Husbands occupation, Estimated monthly income, and Family size), Obstetrics characteristics (Gravidity, Parity, Having ANC visit, Number of visits, Place of last ANC visit, Course of pregnancy, Place of delivery, Delivery attendant, Mode of delivery, Birth outcome, Any history of neonatal death, Wantedness of pregnancy, Getting advice on importance of PNC, Maternal complication during postnatal period, and Newborns complication during pregnancy), Service-related characteristics (Means of transportation, Decision maker on maternity care, Getting help for health services, Maternity waiting room, Duration of stay) and Sources of knowledge (Know the advantages of PNC, Know the recommended postnatal visits, Know the correct timing of PNC, Knows that PNC is free service, Knows at least one components of the service, Knows at least one newborn danger signs,

1  
2  
3 Know consequences of not receiving recommended PNC, Place where PNC is delivered). We  
4 used the STROBE checklist to check the overall composition of the study.<sup>24</sup>

5  
6 **Operational definitions:** In this study, if a mother had at least one postnatal care check-up for  
7 the last delivery provided by skilled health care providers within 7 days after delivery, “Yes for  
8 early postnatal care services utilization, otherwise no”.<sup>8,25,26</sup> Skilled health care provider includes  
9 Nurses, Midwives, Health Officers, HEW, and Doctors).<sup>27</sup>

## 15 16 **Patient and public involvement**

17  
18 Patients were not involved in the study

## 19 20 21 **Sample size determination**

22  
23 The sample size was determined by using a single population proportion formula using the  
24 following assumptions: a confidence interval of 95%, a margin of error of 5%, and the  
25 prevalence of early postnatal service utilization of 23.7%.<sup>10</sup> By adding a 10% non-response rate,  
26 the final sample size was 301. The study participants were selected using a systematic random  
27 sampling technique.

## 28 29 30 31 32 33 **Sampling techniques**

34  
35 The list of women who gave birth in the last 12 months was obtained from delivery registers and  
36 cross-checked with the community health information system (CHIS) of health posts. Wolkite  
37 town has 11 kebeles from which 4 were selected using the lottery method, and then a sample was  
38 allocated proportionally to each kebele. Finally, the study participants were selected by using a  
39 systematic random sampling technique, and 301 eligible mothers who gave birth within the last  
40 12 months preceding the survey were interviewed. Hence five (5) study participants were non-  
41 respondents after three consecutive home visits.

## Data collection instruments and procedures

The data collection tool was prepared in English after reviewing related literature and then translated into the Amharic language. The questionnaire consisted of socio-demographic characteristics, obstetrics characteristics, service-related characteristics, and sources of knowledge about early postnatal care (**Annex 1**). Data were collected using a pre-tested structured interviewer-administered questionnaire. To assure the quality of data: Four diploma midwives were trained for data collection and two BSc midwives were assigned as a supervisor under the supervision of the principal investigator. To minimize information bias data were collected from postnatal mothers aged 18 years and living more than six months in the town.

Filled questionnaires were daily checked for completeness and consistency. The reliability of the questionnaire was checked by Cronbach's alpha value, which was 0.78.

## Data management and analysis

Data were cleaned and entered into Epi Data 3.1 and exported to SPSS 23 for analysis. The data was cleaned by running frequency, checking missing values, and the presence of outliers. We summarized proportions of categorical variables by using mean with standard deviation (SD) based on the distribution of data for continuous variables. Normality was checked using the Shapiro–Wilk test. The factors associated with the dependent variable were analyzed using binary logistic regression. Bivariate analysis, crude odds ratio (COR) with 95% CI, was used to see the association between the outcome variable with each independent variable. Variables with a p-value of  $\leq 0.25$  in the bivariate analysis were selected for the multivariable logistic regression model. Multi-collinearity was checked to see the linear correlation among the independent variables. Model goodness of fitness was tested by Hosmer-Lemeshow statistic. The strength of the association between dependent and independent variables was assessed using an adjusted odds ratio (AOR) with a 95% confidence interval. The p-value  $< 0.05$  was considered statistically significant.



## RESULTS

### Socio-demographic characteristics of study participants

A total of 301 study participants were involved in this study, with a response rate of 98.4%. the majority of the respondents 280(93.0%) were married, 144(47.8%) of the respondents were Orthodox religion followers, 275(91.4%) were Gurage by ethnicity, 142(47.2%) had no formal education, more than two-thirds, 188 (62.5%) of the participant were housewife, more than two-fifth, 129(42.9%) of husbands of the respondents had no formal education, almost three-fourth, 225(74.8%) of the respondent were farmers and nearly one-half, 149(49.5%) of the respondents' had income below the mean level (597.4 birrs). The minimum and maximum numbers of family sizes were 2 and 8, respectively, with a mean of  $4\pm$  (standard deviation of 1) (**Table 1**).

Table 1: Socio-demographic characteristics of early postnatal care services utilization among postnatal women in Wolkite town, southeast Ethiopia, 2021 (n=301)

| Category                   | Frequency | Percent (%) |
|----------------------------|-----------|-------------|
| <b>Age of the mother</b>   |           |             |
| Less than 20               | 22        | 7.3         |
| 20-34                      | 206       | 68.4        |
| ≥35                        | 73        | 24.3        |
| <b>Marital status</b>      |           |             |
| Married                    | 280       | 93          |
| Unmarried                  | 13        | 4.3         |
| Divorced                   | 6         | 2.0         |
| Widowed                    | 2         | 0.7         |
| <b>Religion</b>            |           |             |
| Orthodox                   | 144       | 47.8        |
| Muslim                     | 122       | 40.5        |
| Protestant                 | 31        | 10.3        |
| Catholic                   | 4         | 1.3         |
| <b>Ethnicity</b>           |           |             |
| Gurage                     | 275       | 91.4        |
| Amhara                     | 24        | 8.0         |
| Oromo                      | 2         | 0.7         |
| <b>Educational status</b>  |           |             |
| No formal education        | 142       | 47.2        |
| Grade 1-8                  | 70        | 23.3        |
| Secondary 9-12             | 77        | 25.6        |
| College and above          | 12        | 4.0         |
| <b>Occupational status</b> |           |             |
| Housewife                  | 188       | 62.5        |
| Civil servant              | 11        | 3.7         |
| Merchant                   | 76        | 25.2        |

|                                    |     |      |
|------------------------------------|-----|------|
| Daily laborer                      | 18  | 6.0  |
| Farmer                             | 8   | 2.7  |
| <b>Husbands educational status</b> |     |      |
| No formal education                | 129 | 42.9 |
| Grade 1-8                          | 108 | 35.9 |
| Secondary 9-12                     | 53  | 17.6 |
| College and above                  | 11  | 3.7  |
| <b>Husbands occupation</b>         |     |      |
| Farmer                             | 225 | 74.8 |
| Civil servant                      | 13  | 4.3  |
| Merchant                           | 55  | 18.3 |
| Daily laborer                      | 8   | 2.7  |
| <b>Monthly income</b>              |     |      |
| Below average (597.4 ETB)          | 149 | 49.5 |
| More than average (597.4 ETB)      | 152 | 50.5 |
| <b>Family size</b>                 |     |      |
| Less than average (4)              | 154 | 51.2 |
| More than average (4)              | 147 | 48.8 |

## Obstetrics related characteristics of study participants

The finding showed that the prevalence of early postnatal care services utilization was 23.3% (95% CI: 18.9 to 27.9). Among the respondents, nearly two-fifths, 119(39.5%) had been pregnant for the first time and more than four-fifths, 268(89.0%) had ANC visits. Of the ANC attendants, 83(30.9%) have one ANC visit and 80(29.8%) have four and above visits. Regarding the place of the last ANC visit, 208(77.6%) was at the health center. Related to the course of pregnancy, almost two-fifths, 112(37.2%) of the respondents had a complicated pregnancy, four-fifths, 236(78.4%) of the respondents were given birth at a health center and most of the respondents, 284(94.4%) were attended by health professionals. According to the mode of delivery, more than four-fifths, 254(84.4%) of the respondents were delivered by SVD. **Table: 2**

### Maternal complications

Among the respondents, 18.3% had maternal complications' during the early postnatal period. Of the complications 4.3% were sepsis, and 3.7% were PPH (**Figure 1**).

### Newborn complications

Among the respondents, 27.9% had newborn complications during the early postnatal period. Of the complications, 16.3% were unable to breastfeed, and 7% were having breathing difficulties (**Figure 2**).

Table 2: Obstetrics characteristics of early postnatal care services utilization among postnatal women in Wolkite town, Gurage zone, southeast Ethiopia, 2021(n=301)

| Variables           | Category                 | Frequency | Percentage |
|---------------------|--------------------------|-----------|------------|
| Gravidity           | One                      | 119       | 39.5       |
|                     | 2-4                      | 106       | 35.2       |
|                     | ≥5                       | 76        | 25.2       |
| Parity              | One                      | 119       | 39.5       |
|                     | 2-4                      | 106       | 35.2       |
|                     | ≥5                       | 76        | 25.2       |
| Having ANC visit    | Yes                      | 268       | 89.0       |
|                     | No                       | 33        | 11.0       |
| Number of visits    | One                      | 83        | 31         |
|                     | Two                      | 55        | 20.5       |
|                     | Three                    | 50        | 18.6       |
|                     | Four and above           | 80        | 29.8       |
| Place of ANC visit  | Health center            | 208       | 77.6       |
|                     | Hospital                 | 51        | 19         |
|                     | Health post              | 9         | 3.3        |
| Course of pregnancy | Complicated              | 112       | 37.2       |
|                     | Un complicated           | 189       | 62.8       |
| Place of delivery   | Health center            | 236       | 78.4       |
|                     | Hospital                 | 50        | 16.6       |
|                     | Health post              | 6         | 2.0        |
| Delivery attendant  | Home                     | 9         | 3.0        |
|                     | Health professionals     | 284       | 94.4       |
|                     | Health extension workers | 15        | 5.0        |
|                     | Others                   | 2         | 0.7        |
| Mode of delivery    | SVD                      | 254       | 84.4       |
|                     | Instrumental delivery    | 16        | 5.3        |
|                     | CS                       | 31        | 10.3       |

|                                                    |            |     |      |
|----------------------------------------------------|------------|-----|------|
| Birth outcome                                      | Live birth | 292 | 97   |
|                                                    | Stillbirth | 9   | 3.0  |
| Any history of neonatal death                      | Yes        | 10  | 3.3  |
|                                                    | No         | 291 | 96.7 |
| Having early PNC                                   | yes        | 70  | 23.3 |
|                                                    | No         | 231 | 76.7 |
| Wantedness of pregnancy                            | Wanted     | 222 | 73.8 |
|                                                    | Unwanted   | 79  | 26.2 |
| Getting advice on the importance of PNC            | Yes        | 167 | 55.5 |
|                                                    | No         | 134 | 44.5 |
| Maternal complications during the postnatal period | Yes        | 55  | 18.3 |
|                                                    | No         | 246 | 81.7 |
| Newborns complication during pregnancy             | Yes        | 84  | 27.9 |
|                                                    | No         | 217 | 72.1 |

## Service-related characteristics of study participants

Among the respondents, more than two-thirds, 190(63.1%) of the respondents traveled by foot to the health facility, while more than two-fifths, 141(46.8%) of the respondents decided by themselves to have early PNC. More than two-thirds, 228(75.7%) of the respondents were getting help from their husbands with health services. Of those who used the maternity waiting room, 50(16.6%) stayed for less than a week and 40(13.3%) stayed for one week (**Table 3**).

Table 3: Service related characteristics of early postnatal care services utilization among postnatal women in Wolkite town, Gurage zone, southeast Ethiopia, 2021(n=301)

| Variables                         | Category         | Frequency | Percentage |
|-----------------------------------|------------------|-----------|------------|
| Means of transportation           | Foot             | 190       | 63.1       |
|                                   | Vehicles         | 111       | 36.9       |
| Decision maker on maternity care  | Herself          | 141       | 46.8       |
|                                   | Husband          | 49        | 16.3       |
|                                   | Joint decision   | 111       | 36.9       |
| Getting help with health services | Husband          | 228       | 75.7       |
|                                   | Relatives        | 65        | 21.6       |
|                                   | Families         | 8         | 2.7        |
| Maternity waiting room            | Yes              | 90        | 29.9       |
|                                   | No               | 211       | 70.1       |
| Duration of stay (n=90)           | Less than a week | 50        | 55.6       |
|                                   | For one week     | 40        | 44.4       |

### Sources of knowledge about early postnatal care

Among the respondents, 220(70.9%) have information about early postnatal care (EPNC) services. Most of the respondents, 150 (68.2%) acquired information about EPNC utilization from television. Nearly one-fifths, 81(26.9%) of the respondents have not known the advantages of postnatal care, and four-fifth, 243(80.7%) of the respondents were known to recommend postnatal visits. Nearly four-fifths, 256(85.0%) of the respondents did not know the correct time of early PNC service utilization. Nearly one-half, 133 (44.2%) of the respondents knew that early PNC was a free service, and nearly two-thirds, 188(62.5%) of the respondents did not know at least one component of the service (**Table 4**).

Table 4: Knowledge about early postnatal care services utilization among postnatal women in Wolkite town, southeast Ethiopia, 2021(n=301)

| Variables                                   | Category | Frequency(n) | Percentage (%) |
|---------------------------------------------|----------|--------------|----------------|
| Know the advantages of PNC                  | Yes      | 220          | 73.1           |
|                                             | No       | 81           | 26.9           |
| Know the recommended postnatal visits       | Yes      | 58           | 19.3           |
|                                             | No       | 243          | 80.7           |
| Know the correct timing of PNC              | Yes      | 45           | 15.0           |
|                                             | No       | 256          | 85.0           |
| Knows that PNC is a free service            | Yes      | 133          | 44.2           |
|                                             | No       | 168          | 55.8           |
| Knows at least one component of the service | Yes      | 113          | 37.5           |
|                                             | No       | 188          | 62.5           |
| Knows at least one newborn danger signs     | Yes      | 150          | 49.8           |



|                                                        |     |     |      |
|--------------------------------------------------------|-----|-----|------|
|                                                        | No  | 151 | 50.2 |
| Know the consequences of not receiving recommended PNC | Yes | 48  | 15.9 |
|                                                        | No  | 253 | 84.1 |
| Place where PNC is delivered                           | Yes | 102 | 33.9 |
|                                                        | No  | 199 | 66.1 |

### Factors associated with early postnatal care service utilization among participants

On bivariate analysis monthly income, Gravidity, parity, the desire for pregnancy, ANC follow up, mode of delivery, any newborn illness/complication, Obstetrics complication, and knowledge of PNC were candidates for multivariate analysis. On multivariable analysis gravidity, the desire for pregnancy and mode of delivery were statistically significant in the final model (**Table 5**).

#### Multivariable analysis

Of the total participant, 76(25.2%) had more than 4 pregnancies and were 2.90 times (AOR: 2.90; 95%CI: 1.18, 7.11) more likely to utilize EPNC when compared to women who had less than or equal to four pregnancies. On the other hand, participants who have the desire for pregnancy were 4.17 times (AOR: 4.17; 95%CI: 1.93, 9.03) more likely when compared to those who haven't the desire for pregnancy. On the other hand, participants who gave birth by SVD were 2.18 times (AOR: 2.18; 95%CI: 1.07, 9.39) more likely when compared to those who gave birth by CS.

Table 5: Factors associated with early postnatal care services utilization among postnatal women of Wolkite town, southeast Ethiopia, 2021(n=301)

| Variables                               | EPNC |     | COR (95%CI)      | AOR (95%CI)             | P-value       |
|-----------------------------------------|------|-----|------------------|-------------------------|---------------|
|                                         | Yes  | No  |                  |                         |               |
| <b>Estimated monthly income</b>         |      |     |                  |                         |               |
| Below average                           | 43   | 106 | 1                | 1                       |               |
| >Average                                | 75   | 77  | 2.40(1.49, 3.87) | 1.22(0.67, 2.23)        | 0.517         |
| <b>Gravidity</b>                        |      |     |                  |                         |               |
| One                                     | 31   | 88  | 1                | 1                       |               |
| 2-4                                     | 41   | 65  | 1.79(1.02, 3.15) | 1.22(0.54, 2.77)        | 0.629         |
| More than 4                             | 46   | 30  | 4.35(2.35, 8.06) | <b>2.90(1.18, 7.11)</b> | <b>0.020</b>  |
| <b>Parity</b>                           |      |     |                  |                         |               |
| Primiparous                             | 35   | 84  | 1                | 1                       |               |
| Multiparous                             | 41   | 65  | 1.51(0.87, 2.64) | 1.18(0.51, 2.76)        | 0.699         |
| Grand Multiparous                       | 42   | 34  | 2.97(1.63, 5.40) | 1.09(0.46, 2.62)        | 0.844         |
| <b>Desire of pregnancy</b>              |      |     |                  |                         |               |
| Yes                                     | 103  | 119 | 3.69(1.98, 6.87) | <b>4.17(1.93, 9.03)</b> | <b>0.0001</b> |
| No                                      | 15   | 64  | 1                | 1                       |               |
| <b>Having ANC follow up</b>             |      |     |                  |                         |               |
| Yes                                     | 111  | 157 | 2.63(1.10, 6.26) | 0.39(0.12, 1.28)        | 0.121         |
| No                                      | 7    | 26  | 1                | 1                       |               |
| <b>Course of pregnancy</b>              |      |     |                  |                         |               |
| Complicated                             | 60   | 52  | 2.61(1.61, 4.23) | 1.57(0.85, 2.92)        | 0.151         |
| Uncomplicated                           | 58   | 131 | 1                | 1                       |               |
| <b>Mode of delivery</b>                 |      |     |                  |                         |               |
| SVD                                     | 107  | 147 | 2.38(1.04, 6.01) | <b>2.18(1.07, 9.39)</b> | <b>0.038</b>  |
| CS                                      | 11   | 36  | 1                | 1                       |               |
| <b>Any newborn illness/complication</b> |      |     |                  |                         |               |

|                                |    |     |                  |                   |        |
|--------------------------------|----|-----|------------------|-------------------|--------|
| Yes                            | 42 | 42  | 1.85(1.11, 3.09) | 1.59(0.84, 2.99)  | 0.155  |
| No                             | 76 | 141 | 1                | 1                 |        |
| <b>Obstetrics complication</b> |    |     |                  |                   |        |
| Yes                            | 41 | 14  | 6.43(1.01, 9.48) | 9.12(0.34, 12.53) | 0.0001 |
| No                             | 77 | 169 | 1                | 1                 |        |
| <b>Knowledge on PNC</b>        |    |     |                  |                   |        |
| Poor                           | 45 | 115 | 1                | 1                 |        |
| Good                           | 73 | 68  | 2.74(1.70, 4.42) | 1.86(0.99, 3.49)  | 0.051  |

Key: EPNC-Early Postnatal Care Utilization, \*-Pvalue<0.05, \*\*-Pvalue≤0.01

## Discussion

Early postnatal care service utilization in developing countries is one of the health care service utilization problems among postnatal women, which is related to extensive maternal and neonatal complications and mortality.<sup>1, 2,6</sup> Prior studies have noted the importance of early postnatal checkups in improving maternal survival.<sup>8,28</sup> This study was intended to identify the prevalence of early postnatal care services utilization and associated factors among postnatal women in Wolkite Ethiopia.

This study revealed that 23.3 % (95% CI: 18.9-27.9) of women received early postnatal care. This result is lower than the study reported in some African countries such as in Myanmar (72.1%),<sup>29</sup> Zambia (63%),<sup>30</sup> Builsa district (62%),<sup>31</sup> Hadiya Zone (51.4%),<sup>32</sup> Uganda (50%),<sup>8</sup> Assela town (37.5%),<sup>33</sup> Adigrat Town (34.3%),<sup>34</sup> Debremarkos town (33.5%),<sup>35</sup> and Hawassa Zuria District 23.7%,<sup>10</sup>. However, it is higher than the findings of studies conducted in China (17%),<sup>36</sup> Tanzania (10.4%),<sup>37</sup> South Sudan (11.4%),<sup>9</sup> Debremarkos town (16.2%),<sup>38</sup> and Wonango District,<sup>11</sup>. The difference might be due to the difference in statistical analysis employed in the studies and the socio-cultural background of the participants.

In this study wanted pregnancy was found to be associated factor with early postnatal care services utilization. This finding is nearly similar to the studies conducted in Uganda (50%),<sup>8</sup> Tanzania,<sup>36</sup> Adigrat Town,<sup>34</sup> Assela town,<sup>33</sup> and Hawassa Zuria District 23.7%,<sup>10</sup>. This could be explained by the various advantages of public enlightenment on planning for pregnancy. The difference between studies might be sample size; the sample size of this study was small, even if it was scientifically calculated; which might make variables insignificant.

This study revealed that having more than four previous pregnancies was among the factors associated with early postnatal care services utilization. This indicates that former pregnancy

1  
2  
3 shared experience to attend early postnatal checkups. This finding was different from that of the  
4  
5 studies conducted in Debre Birhan,<sup>39</sup> Assela town,<sup>33</sup> Adigrat Town,<sup>34</sup> and Mekele city,<sup>40</sup> those  
6  
7 studies shows that mothers having one previous pregnancy were utilized early PNC services on  
8  
9 time. The difference between the studies might be attributed to the socio-cultural difference in  
10  
11 study participants between the studies. This may affect the decision power of women to utilize  
12  
13 this service in some communities.  
14

15  
16 This study revealed that spontaneous vaginal delivery (SVD) was among the factors associated  
17  
18 with early postnatal care services utilization. Similarly, a study conducted by Adigrat Town,<sup>34</sup>  
19  
20 Debre Birhan,<sup>39</sup> Debremarkos town,<sup>35</sup> and Hawassa Zuria District,<sup>10</sup> shows that clients who have  
21  
22 previous experience with SVD were more likely to utilize early postnatal care services. The  
23  
24 difference between the studies might be attributed to sampling techniques and cultural  
25  
26 differences of study participants; those studies used a simple random sampling technique.  
27  
28  
29

### 30 31 **Strengths and limitations of the study**

32 The strengths of this study were it's being a community-based study and the prevalence of early  
33  
34 postnatal care services utilization and associated factors were compared with other studies. The  
35  
36 finding might assist in an entry into community screening programs among high-risk groups.  
37  
38 However, the study has limitation that may be related to the survey types and nature of the cross-  
39  
40 sectional study which did not draw inferences and show cause and effect relations among  
41  
42 variables. The sample size of this study was small, even if it was scientifically calculated. The  
43  
44 study is further limited by the fact that it is based on retrospective information provided by the  
45  
46 survey respondents, which may be subject to recall bias. However, such bias was tried to  
47  
48 minimize some extent by restricting the study to mothers with birth within one year of the  
49  
50 survey.  
51  
52  
53  
54  
55  
56  
57  
58  
59  
60

## Conclusions

This study illustrates the prevalence of early postnatal care services utilization and associated factors among postnatal women. The study has shown that the prevalence of early postnatal care services utilization is found to be slightly low when compared to other studies. Wanted pregnancy, having more than four previous pregnancies (> Gravida IV), and spontaneous vertex delivery (SVD) were significantly associated with early postnatal care services utilization.

This study result revealed that almost all study participants' places of delivery were in a health institution, and only 15% of respondents know the correct follow-up schedules for early postnatal checkups, which is in contrast to the place of delivery. Thus, community-based health promotion should be an important recommendation to increase early postnatal care service utilization among postnatal mothers to improve the level of awareness of early postnatal checkup schedules; done by health care professionals.

## Acknowledgments

We thank our data collectors and the supervisor for their invaluable effort; without them, this study would not have been completed. Our deep gratitude also goes to our study participants who volunteered and took their time to give us all the relevant information for the study. Last but not least, we thank the Wolkite City Administrative Office for their cooperation and help during the data collection.

## Author Contributions

**Planning:** Yirgalem Yosef Lamiso, Mebratu Demissie Senbata, Seblework Abeje Abiy, Mariama Shifa Mohamed

**Methodology:** Yirgalem Yosef Lamiso, Mebratu Demissie Senbata, Seblework Abeje Abiy

**Data curation:** Fantahun Walle Berriera, Shegaw Geze Tenaw, Aberash Beyene Deribew,

**Formal analysis:** Yirgalem Yosef Lamiso, Mebratu Demissie Senbeta, Seblework Abeje Abiy

**Investigation:** Yirgalem Yosef Lamiso, Mebratu Demissie Senbata, Seblework Abeje Abiy

**Software:** Yirgalem Yosef Lamiso, Mebratu Demissie Senbata

**Supervision:** Fantahun Walle Berriera, Shegaw Geze Tenaw, Aberash Beyene Deribew

**Validation:** Yirgalem Yosef Lamiso Mebratu Demissie Senbata, Seblework Abeje Abiy

**Visualization:** Mebratu Demissie Senbeta, Seblework Abeje Abiy, Shegaw Geze Tenaw

**Writing – review & editing:** Yirgalem Yosef Lamiso Mebratu Demissie Senbata

## **Funding**

The authors have not declared a specific grant for this research from any funding agency in the public, commercial or not-for-profit sectors.

## **Competing interests**

The authors declare that they have no competing interests

## **Patient consent for publication**

Not required.

## **Availability of data and materials**

The datasets generated and/or analyzed during the current study are not publicly available

## Ethical Approval and Consent to Participants

Ethics approval: Ethical clearance was obtained from the institutional review board of Wolkite University College of Medicine and Health Science with the reference number RCSUILC/021/2021.

Informed consent: A permission letter was obtained from Wolkite town administration office authorities. Participation in the study was voluntary and written informed consent was obtained from the study participants. All the information taken from the study participants was kept confidential.



## References

1. WHO. Trends in maternal mortality. 2018; <https://documents1.worldbank.org/curated/en/793971568908763231/pdf/Trends-in-maternal-mortality-2000-to-2017-Estimates-by-WHO-UNICEF-UNFPA-World-Bank-Group-and-the-United-Nations-Population-Division.pdf>.
2. WHO. WHO recommendations on postnatal care of the mother and newborn. 2014.
3. Yaya S, Ghose B. Global Inequality in Maternal Health Care Service Utilization: Implications for Sustainable Development Goals. *Health Equity*. 2019;3(1):145-154.
4. WHO U, UNFPA, World Bank Group, and the United Nations Population Division. Trends in maternal mortality: 1990 to 2015. Estimates by WHO, UNICEF. In: UNFPA, World Bank Group, and the United Nations Population Division. Geneva; 2015.
5. Organization WH. Health in 2015: from MDGs, millennium development goals to SDGs, sustainable development goals. 2015.
6. WHO. Postnatal Care for Mothers and Newborns Highlights from the World Health Organization 2013 Guidelines. 2015.
7. Dor A, Pauly M, Eichleay M, Held P. End-stage renal disease and economic incentives: *the international study of health care organization and financing National Bureau of Economic Research Cambridge, Mass, USA*. 2007.
8. USAID'S. Determinants of Early Postnatal Care Attendance in Uganda. 2016.
9. Izudi J, Akwang GD, Amongin D. Early postnatal care use by postpartum mothers in Mundri East County, South Sudan. *BMC Health Services Research*. 2017;17(1).
10. Yoseph S, Dache A, Dona A. Prevalence of Early Postnatal-Care Service Utilization and Its Associated Factors among Mothers in Hawassa Zuria District, Sidama Regional State, Ethiopia: A Cross-Sectional Study. 2021.
11. Tefera Y, Hailu S, Tilahun aR. Early postnatal care service utilization and its determinants among women who gave birth in the last 6 months in Wonago district, south Ethiopia: A community-based cross-sectional study. 2020.
12. Gebreslassie T, Gebrehiwot, Mekonen HH. Prevalence and Associated Factors of Early Postnatal Care Service Use Among Mothers Who Had Given Birth Within the Last 12 Months in Adigrat Town, Tigray, Northern Ethiopia, 2018.
13. WHO. WHO Technical Consultation on Postpartum and Postnatal Care. 2010; [http://apps.who.int/iris/bitstream/handle/10665/70432/WHO\\_MPS\\_10.03\\_eng.pdf;jsessionid=977EC87BBE162C1694EBAB559E4D335A?sequence=1](http://apps.who.int/iris/bitstream/handle/10665/70432/WHO_MPS_10.03_eng.pdf;jsessionid=977EC87BBE162C1694EBAB559E4D335A?sequence=1), 2018.
14. Collaboration Ct. Countdown to 2030: tracking progress towards universal coverage for reproductive, maternal, newborn, and child health. *The Lancet*. 2018.
15. UNICEF. Maternal and Newborn Health Disparities in Ethiopia, UNICEF for every child. 2017; [https://data.unicef.org/wp-content/uploads/country\\_profiles/Ethiopia/country%20profile\\_ETH.pdf](https://data.unicef.org/wp-content/uploads/country_profiles/Ethiopia/country%20profile_ETH.pdf). Accessed 11/28, 2018.
16. CSAE. Central statistics agency of Ethiopia, Ethiopia Demographic and Health Survey 2016. Addis Ababa, Ethiopia, and Rockville, Maryland, USA: CSA and ICF. . 2016; <https://dhsprogram.com/pubs/pdf/FR328/FR328.pdf>. Accessed 12/21/2018, 2018.
17. WHO. global strategies for women, children, and adolescents (2016-2030). 2016. Accessed 12/6/2018, 2018.

18. Darmstadt GL, Bhutta ZA, Cousens S, et al. Evidence-based, cost-effective interventions: how many newborn babies can we save? *The Lancet*. 2005;365(9463):977-988.
19. WHO/UNICEF. Home visits for the newborn child: a strategy to improve survival. 2010; [http://apps.who.int/iris/bitstream/handle/10665/70002/WHO\\_FCH\\_CAH\\_09.02\\_eng.pdf?sequence=1](http://apps.who.int/iris/bitstream/handle/10665/70002/WHO_FCH_CAH_09.02_eng.pdf?sequence=1). Accessed 11/28, 2018.
20. DiBari JN, Yu SM, Chao SM, Lu MC. Use of postpartum care: predictors and barriers. *Journal of pregnancy*. 2014;2014.
21. Organization WH. Every newborn: an action plan to end preventable deaths. 2014.
22. WHO. WHO recommendations on maternal health: guidelines approved by the WHO Guidelines Review Committee. 2017; <http://apps.who.int/iris/bitstream/handle/10665/259268/WHO-MCA-17.10-eng.pdf?sequence=1>. Accessed NOV 28, 2018.
23. WHO. Technical Consultation on Postpartum and Postnatal Care. 2010.
24. Network E, Penelope.ai. The STROBE checklist <https://www.goodreports.org/>.
25. Ndugga P, Namiyonga NK, Sebuwufu D. Determinants of early postnatal care attendance: analysis of the 2016 Uganda demographic and health survey. *BMC Pregnancy and Childbirth*. 2020;20(1).
26. An T, D N, A T. Early Postnatal Care Service Utilization and Associated Factors among Mothers Who Gave Birth in the Last 12 Months in Asako District, Arsi Zone, southeast Ethiopia in 2016. *Journal of Women's Health Care*. 2017;06(01).
27. EDHS. Ethiopia demographic and health survey 2016.
28. Izudi J, Denise G, Amongin D. Early postnatal care use by postpartum mothers in Mundri East County, South Sudan. 2017.
29. Mon AS, Phyu MK, Thinkhamrop W, Thinkhamrop B. women and its determinants: a cross-sectional study. 2018.
30. Chungu C, Makasa M, Chola M, Jacobs CN. Place of Delivery Associated With Postnatal Care Utilization Among Childbearing Women in Zambia. *Frontiers in Public Health*. 2018;6(94).
31. Sakeah E, Aborigo R, Sakeah JK, et al. The role of community-based health services in influencing postnatal care visits in the Builsa and the West Mamprusi districts in rural Ghana. *BMC pregnancy and childbirth*. 2018;18(1):295.
32. Belachew T, Taye A, Belachew T. Postnatal care service utilization and associated factors among mothers in Lemo Woreda, Ethiopia. *J Women's Health Care*. 2016;5(10.4172):2167-0420.1000318.
33. Amane Tumbure1 DA, Ellie Fantahun1, Megersa Negusu1, Tsegaw Yitbarek1, Legese Tadesse2\* and Tewodros Desalegn2 Assessment of Postnatal Care Service Utilization and Associated Factors in Asella Town, Arsi Zone, Oromiya Regional State, Ethiopia. *Global Journal of Reproductive medicine*. 2018;6(1).
34. Gebreslassie T, Haftea G, Mekonen H. Prevalence and Associated Factors of Early Postnatal Care Service Use Among Mothers Who Had Given Birth Within the Last 12 Months in Adigrat Town, Tigray, Northern Ethiopia,. 2018.
35. Limenih MA, Endale ZM, Dachew BA. Postnatal Care Service Utilization and Associated Factors among Women Who Gave Birth in the Last 12 Months before the Study in Debre Markos Town, Northwestern Ethiopia: A Community-Based Cross-Sectional Study. *International Journal of Reproductive Medicine*. 2016;2016:1-7.

36. You H, Chen J, Bogg L, et al. Study on the factors associated with postpartum visits in rural China. *PLoS One*. 2013;8(2):e55955.
37. Kanté AM, Chung CE, Larsen AM, Exavery A, Tani K, Phillips JF. Factors associated with compliance with the recommended frequency of postnatal care services in three rural districts of Tanzania. *BMC pregnancy and childbirth*. 2015;15(1):341.
38. Limenih MA, Endale ZM, Dachew BA. Postnatal Care Service Utilization and Associated Factors among Women Who Gave Birth in the Last 12 Months before the Study in Debre Markos Town, Northwestern Ethiopia: A Community-Based Cross-Sectional Study. *International Journal of Reproductive Medicine*. 2016;2016:7.
39. Akibu M, Tsegaye W, Megersa T, Nurgi S. Prevalence and Determinants of Complete Postnatal Care Service Utilization in Northern Shoa, Ethiopia. *Journal of pregnancy*. 2018;2018.
40. Gebrehiwot G, Medhanyie AA, Gidey G, Abrha K. Postnatal care utilization among urban women in northern Ethiopia: a cross-sectional survey. *BMC women's health*. 2018;18(1):78.

### Legends:

Figure 1: Types of maternal complications among postnatal women in Wolkite town, southwest Ethiopia, 2021(n=301)

Figure 2: Types of newborn complications during postnatal period among postnatal women in Wolkite town, southwest Ethiopia, Ethiopia, 2021(n=301)

Annex 1: English version interviewer-administered questionnaire on early postnatal care services utilization among postnatal women in southwest Ethiopia, 2021.

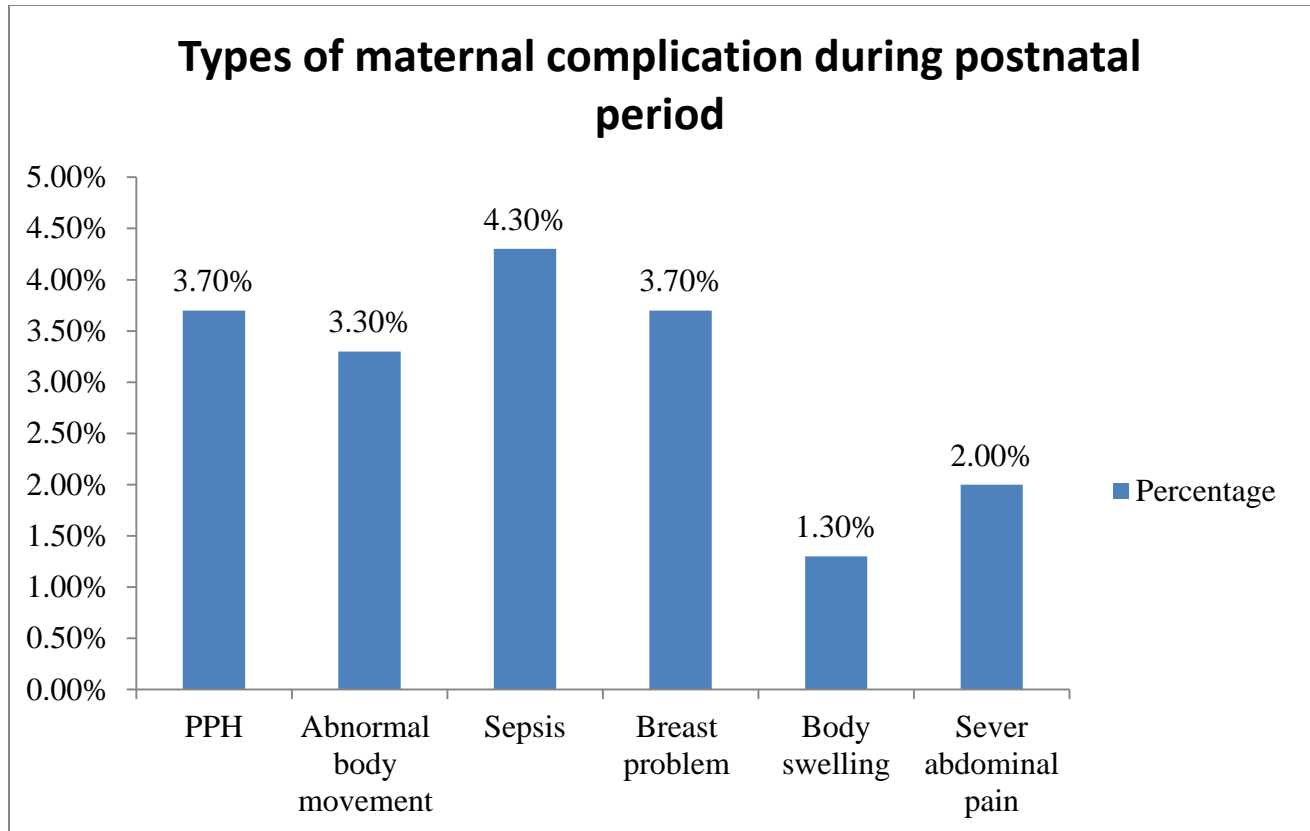

31  
32  
33  
34  
35  
36  
37  
38  
39  
40  
41  
42  
43  
44  
45  
46  
47  
48  
49  
50  
51  
52  
53  
54  
55  
56  
57  
58  
59  
60

Figure 1: Types of maternal complication among postnatal women in Wolkite town, southwest, Ethiopia, 2021(n=301)

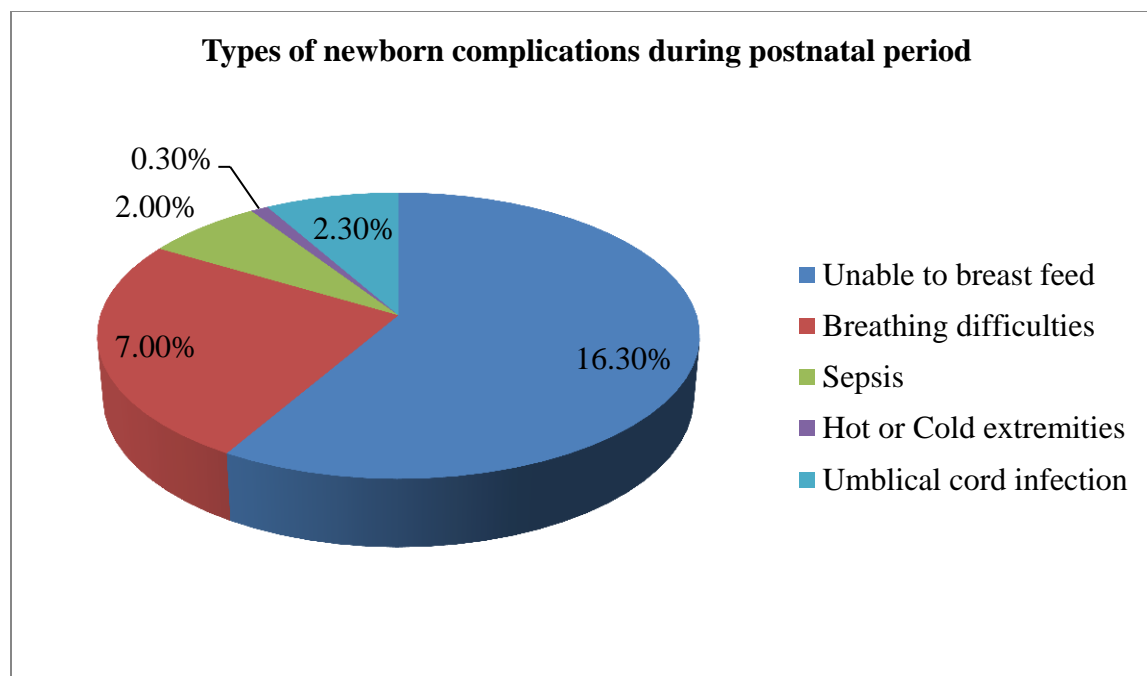

Figure 2: Types of newborn complications during postnatal period among postnatal women in Wolkite town, southwest Ethiopia, 2021(n=301)

## APPENDICES

**Annex 1: English version Interviewer Administered Questionnaire****Consent form for postnatal women:**

Title of research: Prevalence of early postnatal care utilization and associated factors among postnatal women in Wolkite town, Gurage zone, Southern Ethiopia, 2021

Hello my name is----- . I am working as data collector in the research conducted by Yirgalem Yosef. The research is only for academic purposes. I assure you that the views expressed in this questionnaire will under no circumstance be made public or disclosed to a third party. The details of this interview and the information you provide will be held in confidence.

**Declaration by Respondent**

I certify that I voluntarily agree to answer the research questions, that the study has been explained to me. All my questions have been answered satisfactorily. I understand I am free to discontinue participation at any time if I so choose.

.....

Signature

Date.....

**Researcher's Statement**

I certify that the participant has been given ample time to read, learn and understand the study. All questions and clarifications raised by the participant have been addressed.

.....

Yirgalem Yosef (Researcher)

Date.....

**Instruction:** Please **Circle the appropriate answer** in space provided

Questionnaire Code\_\_\_\_\_

**SECTION 1: Socio demographic characteristics**

| S.N | Questions                   | Answers                                                                                         | Skip |
|-----|-----------------------------|-------------------------------------------------------------------------------------------------|------|
| 101 | Age (in years)              | 1. [ _____ ]<br>2. I don't know-----                                                            |      |
| 102 | Current marital status      | 1. Married<br>2. Divorced /Separated<br>3. un married<br>4. Widowed                             |      |
| 103 | Religion                    | 1. Orthodox<br>2. Muslim<br>3. Catholic<br>4. Protestant<br>5. Others                           |      |
| 104 | Ethnicity                   | 1. Gurage<br>2. Amhara<br>3. Oromo<br>4. Others.                                                |      |
| 105 | Education status            | 1. No formal Education<br>2. 1-8 <sup>th</sup><br>3. 9-12 <sup>th</sup><br>4. College and above |      |
| 106 | Occupational status         | 1. House wife<br>2. Civil servant<br>3. Merchant<br>4. Daily labour<br>5. Farmer                |      |
| 107 | Husbands educational status | 1. No formal Education<br>2. 1-8 <sup>th</sup><br>3. 9-12 <sup>th</sup><br>4. College and above |      |

|                                                            |                          |                                                                                                                                     |             |
|------------------------------------------------------------|--------------------------|-------------------------------------------------------------------------------------------------------------------------------------|-------------|
| 108                                                        | Husbands occupations     | <ol style="list-style-type: none"> <li>1. Farmer</li> <li>2. Civil servant</li> <li>3. Merchant</li> <li>4. Daily labour</li> </ol> |             |
| 109                                                        | Estimated monthly income | <ol style="list-style-type: none"> <li>1. below average(597.4 ETB)</li> <li>2. More than average (597.4 ETB)</li> </ol>             |             |
| 110                                                        | Family size              | <ol style="list-style-type: none"> <li>1. less than average (4)</li> <li>2. more than average (4)</li> </ol>                        |             |
| <b>Section two: obstetric and neonatal characteristics</b> |                          |                                                                                                                                     | <b>Code</b> |
| 201                                                        | Gravidity                | -----                                                                                                                               |             |
| 202                                                        | Parity                   | -----                                                                                                                               |             |
| 203                                                        | Having ANC visit         | <ol style="list-style-type: none"> <li>1. Yes</li> <li>2. No</li> </ol>                                                             |             |
| 204                                                        | Number of ANC Visits     | <ol style="list-style-type: none"> <li>1. one</li> <li>2. two</li> <li>3. Three</li> <li>4. Four and above</li> </ol>               |             |
| 205                                                        | Place of last ANC visit  | <ol style="list-style-type: none"> <li>1. Health center</li> <li>2. Hospital</li> <li>3. Health post</li> </ol>                     |             |
| 206                                                        | Course of pregnancy      | <ol style="list-style-type: none"> <li>1. Complicated</li> <li>2. Uncomplicated</li> </ol>                                          |             |
| 207                                                        | Place of delivery        | <ol style="list-style-type: none"> <li>1. Health center</li> <li>2. Hospital</li> <li>3. 3. Health post</li> <li>4. Home</li> </ol> |             |
| 208                                                        | Delivery Attendant       | <ol style="list-style-type: none"> <li>1. Health professionals</li> <li>2. Health extension workers</li> <li>3. Other</li> </ol>    |             |
| 209                                                        | Mode of delivery         | <ol style="list-style-type: none"> <li>1. SVD</li> </ol>                                                                            |             |



|                                                                                          |                                            |                                               |               |
|------------------------------------------------------------------------------------------|--------------------------------------------|-----------------------------------------------|---------------|
|                                                                                          |                                            | 2. Instrumental delivery<br>3. CS             |               |
| 210                                                                                      | Birth outcome                              | 1. Live birth<br>2. Still birth               |               |
| 211                                                                                      | Any history of Neonatal death              | 1. Yes<br>2. No                               |               |
| 212                                                                                      | Wantedness of pregnancy                    | 1. Wanted<br>2. Unwanted                      |               |
| 213                                                                                      | Have you got advices on Importance of PNC? | 1. Yes<br>2. No                               |               |
| 214                                                                                      | New born complication during pregnancy     | 1. Yes<br>2. No                               |               |
| <b>Section three : Health service related factors (access to skilled maternity care)</b> |                                            |                                               | <b>Code</b>   |
| 301                                                                                      | Means of transportation                    | 1. Foot<br>1. Vehicle                         |               |
| 302                                                                                      | Decision maker on maternity care           | 1. Herself<br>2. Husband<br>3. Joint decision |               |
| 303                                                                                      | Getting help for health services           | 1. Husband<br>2. Relatives<br>3. Families     |               |
| 304                                                                                      | Using Maternity waiting room               | 1. Yes<br>2. No                               | If yes<br>305 |
| 305                                                                                      | Duration of stay                           | 1. Less than a week<br>2. For one week        |               |
| <b>Section four: knowledge of mothers towards early PNC service</b>                      |                                            |                                               | <b>Code</b>   |
| 401                                                                                      | Knows advantages of PNC                    | 1. Yes<br>1. No                               |               |
| 402                                                                                      | Knows Recommended PNC                      | 2. Yes<br>3. No                               |               |

|     |                                                    |                 |  |
|-----|----------------------------------------------------|-----------------|--|
| 403 | Know the correct timing of PNC                     | 1. Yes<br>2. No |  |
| 404 | Knows that PNC is free services                    | 1. Yes<br>1. No |  |
| 405 | Knows at least one component of the services       | 1. Yes<br>2. No |  |
| 406 | Knows at least on newborn danger sign              | 1. Yes<br>2. No |  |
| 407 | know consequences of not receiving recommended PNC | 1. Yes<br>2. No |  |
| 408 | Know place where PNC is delivered                  | 1. Yes<br>2. No |  |

**THANK YOU VERY MUCH!!!!!!**

# Reporting checklist for cross sectional study.

Based on the STROBE cross sectional guidelines.

## Instructions to authors

Complete this checklist by entering the page numbers from your manuscript where readers will find each of the items listed below.

Your article may not currently address all the items on the checklist. Please modify your text to include the missing information. If you are certain that an item does not apply, please write "n/a" and provide a short explanation.

Upload your completed checklist as an extra file when you submit to a journal.

In your methods section, say that you used the STROBE cross sectional reporting guidelines, and cite them as:

von Elm E, Altman DG, Egger M, Pocock SJ, Gøtzsche PC, Vandenbroucke JP. The Strengthening the Reporting of Observational Studies in Epidemiology (STROBE) Statement: guidelines for reporting observational studies.

|                           | Reporting Item                                                                                                                                     | Page Number            |
|---------------------------|----------------------------------------------------------------------------------------------------------------------------------------------------|------------------------|
| <b>Title and abstract</b> |                                                                                                                                                    |                        |
| Title                     | <a href="#">#1a</a> Indicate the study's design with a commonly used term in the title or the abstract                                             | 1&2                    |
| Abstract                  | <a href="#">#1b</a> Provide in the abstract an informative and balanced summary of what was done and what was found                                | 2                      |
| <b>Introduction</b>       |                                                                                                                                                    |                        |
| Background / rationale    | <a href="#">#2</a> Explain the scientific background and rationale for the investigation being reported                                            | 4&5                    |
| Objectives                | <a href="#">#3</a> State specific objectives, including any prespecified hypotheses                                                                | Highlighted on result. |
| <b>Methods</b>            |                                                                                                                                                    |                        |
| Study design              | <a href="#">#4</a> Present key elements of study design early in the paper                                                                         | 6                      |
| Setting                   | <a href="#">#5</a> Describe the setting, locations, and relevant dates, including periods of recruitment, exposure, follow-up, and data collection | 6                      |

|    |                        |                      |                                                                                                  |      |
|----|------------------------|----------------------|--------------------------------------------------------------------------------------------------|------|
| 1  | Eligibility criteria   | <a href="#">#6a</a>  | Give the eligibility criteria, and the sources and methods of selection of participants.         | 6    |
| 2  |                        |                      |                                                                                                  |      |
| 3  |                        |                      |                                                                                                  |      |
| 4  |                        | <a href="#">#7</a>   | Clearly define all outcomes, exposures, predictors, potential confounders, and effect modifiers. | 7    |
| 5  |                        |                      | Give diagnostic criteria, if applicable                                                          |      |
| 6  |                        |                      |                                                                                                  |      |
| 7  |                        |                      |                                                                                                  |      |
| 8  | Data sources /         | <a href="#">#8</a>   | For each variable of interest give sources of data and details of methods of assessment          | 6&7  |
| 9  |                        |                      |                                                                                                  |      |
| 10 | measurement            |                      | (measurement). Describe comparability of assessment methods if there is more than one            |      |
| 11 |                        |                      | group. Give information separately for for exposed and unexposed groups if applicable.           |      |
| 12 |                        |                      |                                                                                                  |      |
| 13 |                        |                      |                                                                                                  |      |
| 14 | Bias                   | <a href="#">#9</a>   | Describe any efforts to address potential sources of bias                                        | 8    |
| 15 |                        |                      |                                                                                                  |      |
| 16 |                        |                      |                                                                                                  |      |
| 17 | Study size             | <a href="#">#10</a>  | Explain how the study size was arrived at                                                        | 7    |
| 18 |                        |                      |                                                                                                  |      |
| 19 |                        |                      |                                                                                                  |      |
| 20 | Quantitative variables | <a href="#">#11</a>  | Explain how quantitative variables were handled in the analyses. If applicable, describe which   | 8    |
| 21 |                        |                      | groupings were chosen, and why                                                                   |      |
| 22 |                        |                      |                                                                                                  |      |
| 23 |                        |                      |                                                                                                  |      |
| 24 | Statistical methods    | <a href="#">#12a</a> | Describe all statistical methods, including those used to control for confounding                | 8    |
| 25 |                        |                      |                                                                                                  |      |
| 26 |                        |                      |                                                                                                  |      |
| 27 | Statistical methods    | <a href="#">#12b</a> | Describe any methods used to examine subgroups and interactions                                  | 8    |
| 28 |                        |                      |                                                                                                  |      |
| 29 | Statistical methods    | <a href="#">#12c</a> | Explain how missing data were addressed                                                          | n/a  |
| 30 |                        |                      |                                                                                                  |      |
| 31 |                        |                      |                                                                                                  |      |
| 32 | Statistical methods    | <a href="#">#12d</a> | If applicable, describe analytical methods taking account of sampling strategy                   | n/a  |
| 33 |                        |                      |                                                                                                  |      |
| 34 |                        |                      |                                                                                                  |      |
| 35 | Statistical methods    | <a href="#">#12e</a> | Describe any sensitivity analyses                                                                | n/a  |
| 36 |                        |                      |                                                                                                  |      |
| 37 | <b>Results</b>         |                      |                                                                                                  |      |
| 38 |                        |                      |                                                                                                  |      |
| 39 |                        |                      |                                                                                                  |      |
| 40 | Participants           | <a href="#">#13a</a> | Report numbers of individuals at each stage of study—eg numbers potentially eligible,            | 9    |
| 41 |                        |                      | examined for eligibility, confirmed eligible, included in the study, completing follow-up, and   |      |
| 42 |                        |                      | analysed. Give information separately for for exposed and unexposed groups if applicable.        |      |
| 43 |                        |                      |                                                                                                  |      |
| 44 |                        |                      |                                                                                                  |      |
| 45 |                        |                      |                                                                                                  |      |
| 46 | Participants           | <a href="#">#13b</a> | Give reasons for non-participation at each stage                                                 | 9    |
| 47 |                        |                      |                                                                                                  |      |
| 48 |                        |                      |                                                                                                  |      |
| 49 | Participants           | <a href="#">#13c</a> | Consider use of a flow diagram                                                                   | n/a  |
| 50 |                        |                      |                                                                                                  |      |
| 51 | Descriptive data       | <a href="#">#14a</a> | Give characteristics of study participants (eg demographic, clinical, social) and information on | 9-15 |
| 52 |                        |                      | exposures and potential confounders. Give information separately for exposed and unexposed       |      |
| 53 |                        |                      | groups if applicable.                                                                            |      |
| 54 |                        |                      |                                                                                                  |      |
| 55 |                        |                      |                                                                                                  |      |
| 56 |                        |                      |                                                                                                  |      |
| 57 | Descriptive data       | <a href="#">#14b</a> | Indicate number of participants with missing data for each variable of interest                  | n/a  |
| 58 |                        |                      |                                                                                                  |      |
| 59 |                        |                      |                                                                                                  |      |
| 60 |                        |                      |                                                                                                  |      |

|    |                   |                      |                                                                                                       |       |
|----|-------------------|----------------------|-------------------------------------------------------------------------------------------------------|-------|
| 1  | Outcome data      | <a href="#">#15</a>  | Report numbers of outcome events or summary measures. Give information separately for                 |       |
| 2  |                   |                      | exposed and unexposed groups if applicable.                                                           |       |
| 3  |                   |                      |                                                                                                       |       |
| 4  |                   |                      |                                                                                                       |       |
| 5  | Main results      | <a href="#">#16a</a> | Give unadjusted estimates and, if applicable, confounder-adjusted estimates and their                 | 11    |
| 6  |                   |                      | precision (eg, 95% confidence interval). Make clear which confounders were adjusted for and           |       |
| 7  |                   |                      | why they were included                                                                                |       |
| 8  |                   |                      |                                                                                                       |       |
| 9  |                   |                      |                                                                                                       |       |
| 10 |                   |                      |                                                                                                       |       |
| 11 | Main results      | <a href="#">#16b</a> | Report category boundaries when continuous variables were categorized                                 | 11    |
| 12 |                   |                      |                                                                                                       |       |
| 13 |                   |                      |                                                                                                       |       |
| 14 | Main results      | <a href="#">#16c</a> | If relevant, consider translating estimates of relative risk into absolute risk for a meaningful time | n/a   |
| 15 |                   |                      | period                                                                                                |       |
| 16 |                   |                      |                                                                                                       |       |
| 17 |                   |                      |                                                                                                       |       |
| 18 | Other analyses    | <a href="#">#17</a>  | Report other analyses done—e.g., analyses of subgroups and interactions, and sensitivity              | 18    |
| 19 |                   |                      | analyses                                                                                              |       |
| 20 |                   |                      |                                                                                                       |       |
| 21 |                   |                      |                                                                                                       |       |
| 22 |                   |                      |                                                                                                       |       |
| 23 | Discussion        |                      |                                                                                                       |       |
| 24 |                   |                      |                                                                                                       |       |
| 25 |                   |                      |                                                                                                       |       |
| 26 | Key results       | <a href="#">#18</a>  | Summarise key results with reference to study objectives                                              | 20-21 |
| 27 |                   |                      |                                                                                                       |       |
| 28 | Limitations       | <a href="#">#19</a>  | Discuss limitations of the study, taking into account sources of potential bias or imprecision.       | 21    |
| 29 |                   |                      | Discuss both direction and magnitude of any potential bias.                                           |       |
| 30 |                   |                      |                                                                                                       |       |
| 31 |                   |                      |                                                                                                       |       |
| 32 |                   |                      |                                                                                                       |       |
| 33 | Interpretation    | <a href="#">#20</a>  | Give a cautious overall interpretation considering objectives, limitations, multiplicity of analyses, | 20-21 |
| 34 |                   |                      | results from similar studies, and other relevant evidence.                                            |       |
| 35 |                   |                      |                                                                                                       |       |
| 36 |                   |                      |                                                                                                       |       |
| 37 | Generalisability  | <a href="#">#21</a>  | Discuss the generalisability (external validity) of the study results                                 | 22    |
| 38 |                   |                      |                                                                                                       |       |
| 39 |                   |                      |                                                                                                       |       |
| 40 | Other Information |                      |                                                                                                       |       |
| 41 |                   |                      |                                                                                                       |       |
| 42 |                   |                      |                                                                                                       |       |
| 43 | Funding           | <a href="#">#22</a>  | Give the source of funding and the role of the funders for the present study and, if applicable,      | n/a   |
| 44 |                   |                      | for the original study on which the present article is based                                          |       |
| 45 |                   |                      |                                                                                                       |       |
| 46 |                   |                      |                                                                                                       |       |

47 None The STROBE checklist is distributed under the terms of the Creative Commons Attribution License CC-BY. This checklist can be completed online  
 48 using <https://www.goodreports.org/>, a tool made by the [EQUATOR Network](#) in collaboration with [Penelope.ai](#)

# BMJ Open

## Prevalence of early postnatal care services utilization and associated factors among postnatal women of Wolkite town, Gurage zone, Southern Ethiopia: a community-based cross-sectional study

|                                 |                                                                                                                                                                                                                                                                                                                                                                                                                                                                                                                                                                                                                                                                 |
|---------------------------------|-----------------------------------------------------------------------------------------------------------------------------------------------------------------------------------------------------------------------------------------------------------------------------------------------------------------------------------------------------------------------------------------------------------------------------------------------------------------------------------------------------------------------------------------------------------------------------------------------------------------------------------------------------------------|
| Journal:                        | <i>BMJ Open</i>                                                                                                                                                                                                                                                                                                                                                                                                                                                                                                                                                                                                                                                 |
| Manuscript ID                   | bmjopen-2022-061326.R2                                                                                                                                                                                                                                                                                                                                                                                                                                                                                                                                                                                                                                          |
| Article Type:                   | Original research                                                                                                                                                                                                                                                                                                                                                                                                                                                                                                                                                                                                                                               |
| Date Submitted by the Author:   | 01-Nov-2022                                                                                                                                                                                                                                                                                                                                                                                                                                                                                                                                                                                                                                                     |
| Complete List of Authors:       | Lamiso, Yirgalem; Wolkite University, College of Health Science, Department of Midwifery<br>Senbeta, Mebratu; Wolkite University, College of Health Science, Midwifery<br>Abeje, Seblework ; Wolkite University, College of Health Science, Department of Medical Biochemistry<br>Walle, Fantahun; Wolkite University, College of Health Science, Department of Nursing<br>Tenaw, Shegaw; Wolkite University, College of Health Science, Department of Midwifery<br>Derribow, Aberash; Wolkite University, College of Health Science, Department of Midwifery<br>Mohamed, Mariama Shifa; Wolkite University, College of Health Science, Department of Midwifery |
| <b>Primary Subject Heading</b>: | Health services research                                                                                                                                                                                                                                                                                                                                                                                                                                                                                                                                                                                                                                        |
| Secondary Subject Heading:      | Health services research, Obstetrics and gynaecology, Health policy                                                                                                                                                                                                                                                                                                                                                                                                                                                                                                                                                                                             |
| Keywords:                       | OBSTETRICS, HEALTH SERVICES ADMINISTRATION & MANAGEMENT, HISTORY (see Medical History), Gynaecological oncology < GYNAECOLOGY, Health & safety < HEALTH SERVICES ADMINISTRATION & MANAGEMENT, Health policy < HEALTH SERVICES ADMINISTRATION & MANAGEMENT                                                                                                                                                                                                                                                                                                                                                                                                       |
|                                 |                                                                                                                                                                                                                                                                                                                                                                                                                                                                                                                                                                                                                                                                 |

SCHOLARONE™  
Manuscripts



I, the Submitting Author has the right to grant and does grant on behalf of all authors of the Work (as defined in the below author licence), an exclusive licence and/or a non-exclusive licence for contributions from authors who are: i) UK Crown employees; ii) where BMJ has agreed a CC-BY licence shall apply, and/or iii) in accordance with the terms applicable for US Federal Government officers or employees acting as part of their official duties; on a worldwide, perpetual, irrevocable, royalty-free basis to BMJ Publishing Group Ltd ("BMJ") its licensees and where the relevant Journal is co-owned by BMJ to the co-owners of the Journal, to publish the Work in this journal and any other BMJ products and to exploit all rights, as set out in our [licence](#).

The Submitting Author accepts and understands that any supply made under these terms is made by BMJ to the Submitting Author unless you are acting as an employee on behalf of your employer or a postgraduate student of an affiliated institution which is paying any applicable article publishing charge ("APC") for Open Access articles. Where the Submitting Author wishes to make the Work available on an Open Access basis (and intends to pay the relevant APC), the terms of reuse of such Open Access shall be governed by a Creative Commons licence – details of these licences and which [Creative Commons](#) licence will apply to this Work are set out in our licence referred to above.

Other than as permitted in any relevant BMJ Author's Self Archiving Policies, I confirm this Work has not been accepted for publication elsewhere, is not being considered for publication elsewhere and does not duplicate material already published. I confirm all authors consent to publication of this Work and authorise the granting of this licence.

1  
2  
3 **Prevalence of early postnatal care services utilization and associated factors**  
4  
5  
6 **among postnatal women of Wolkite town, Gurage zone, Southern Ethiopia: a**  
7  
8 **community-based cross-sectional study**  
9

10  
11 Yirgalem Yosef Lamiso\*<sup>1</sup>, Mebratu Demissie Senbata<sup>1</sup>, Seblework Abeje Abiy<sup>2</sup>, Fantahun Walle  
12  
13 Berriera<sup>3</sup>, Shegaw Geze Tenaw<sup>1</sup>, Aberash Beyene Derribow<sup>1</sup>, Mariama Shifa Mohamed<sup>1</sup>  
14

15  
16 <sup>1</sup>Department of Midwifery, College of Medicine and Health Sciences, Wolkite University,  
17  
18 Wolkite, Ethiopia  
19

20  
21 <sup>2</sup>Department of Biochemistry, College of Medicine and Health Sciences, Wolkite University,  
22  
23 Wolkite, Ethiopia  
24

25  
26 <sup>3</sup>Department of Nursing, College of Medicine and Health Sciences, Wolkite University, Wolkite,  
27  
28 Ethiopia  
29

30  
31 \*Correspondence: Department of midwifery, College of Medicine and Health Sciences, Wolkite  
32  
33 University, Wolkite, Ethiopia; Yirgalem.yosef@wku.edu.et  
34

35 **Authors' address**  
36  
37

- 38 1. Yirgalem Yosef Lamiso (YYL): Yirgalem.yosef@wku.edu.et  
39  
40 2. Mebratu Demissie Senbata (MDS): mebredemis21@gmail.com  
41  
42 3. Seblework abeje Abiy (SAA): Seblework.abeje@wku.edu.et  
43  
44 4. Fantahun Walle Berriera (FWB): Fantahunwalle@gmail.com  
45  
46 5. Shegaw Geze Tenaw (SGT): shagaw.geze@gmail.com  
47  
48 6. Aberash Beyene Derribow (ABD): aberashbey217@gmail.com  
49  
50 7. Mariama Shifa Mohamed (MSM) : daarra16@gmail.com  
51  
52  
53  
54  
55  
56  
57  
58  
59  
60



## ABSTRACT

**Objective:** Early postnatal care service utilization in developing countries is one of the health care service utilization problems among postnatal women, which is related to extensive maternal and neonatal complications and mortality. Identification of the prevalence of early postnatal care services utilization and associated factors among postnatal women is imperative to develop intervention measures to mitigate their complications and public health impact, which is not well known in Ethiopia, particularly in the selected study area. Thus, this study aimed to assess the prevalence of early postnatal care services utilization and associated factors among postnatal women of Wolkite town, southeast Ethiopia.

**Design:** A community-based cross-sectional study design was conducted among 301 postnatal women from 15 May to 15 June 2021.

**Measurements:** Data were collected using a pretested structured questionnaire. The collected data were cleaned and entered Epidata3.1 and then exported to SPSS version 23:00 for analysis. Finally, a multivariate logistic regression model was fitted to identify the factors associated with early postnatal care services utilization. The p-value  $<0.05$  was considered statistically significant.

**Results:** The finding showed that the prevalence of early postnatal care services utilization was 23.3% (95% CI: 18.9 to 27.9). Wanted pregnancy (AOR=4.17, 95% CI 1.93 to 9.03), had over 4 histories of pregnancy (Gravida  $>4$ ) (AOR=2.90, 95% CI 1.18 to 7.11), and had spontaneous vertex delivery (AOR=2.18, 95% CI 1.07 to 9.39) were statistically significant factors of early postnatal care service utilization.

**Conclusion:** The study has shown that the prevalence of early postnatal care services utilization was slightly low when compared to other studies. Thus, community-based health promotion should be an important recommendation to increase early postnatal care service utilization

1  
2  
3 among postnatal mothers to improve the level of awareness of early postnatal checkup schedules;  
4  
5 done by health care providers.  
6

7  
8 **Keywords:** Early postnatal care, Utilization, Southern Ethiopia  
9

### 10 11 **Strengths and Limitations of this study** 12

- 13  
14 ✚ This study include mothers with birth within one year of the survey from the community to  
15 assess the prevalence of early postnatal care services utilization and associated factors and  
16 compares them with other studies.  
17  
18 ✚ The limitation of this study related to the survey types and nature of the cross-sectional study,  
19 which did not draw inferences and show cause-and-effect relations among variables.  
20  
21 ✚ The sample size of this study was small, even if calculated by the scientific method.  
22  
23 ✚ The study is further limited because it is based on retrospective information provided by the  
24 survey respondents, which may be subject to recall bias.  
25  
26 ✚ However, such bias had tried to minimize some extent by restricting the study to mothers  
27 with birth within one year of the survey.  
28  
29  
30  
31  
32  
33  
34  
35  
36  
37  
38  
39  
40  
41  
42  
43  
44  
45  
46  
47  
48  
49  
50  
51  
52  
53  
54  
55  
56  
57  
58  
59  
60

## INTRODUCTION

Globally, approximately 810 women die every day from preventable causes related to pregnancy and childbirth complications, 94% of women's death occur in low and middle-income countries.<sup>1</sup>

According to the World Health Organization (WHO) report, over 60% of global maternal deaths occur in the postpartum period.<sup>2</sup> Three-fourths of maternal mortality occurred within the first week of delivery. The first six weeks (42days) after giving birth is known as the postpartum period.<sup>3,4</sup> The first week (7 days) is an intense time and requires much care for women and newborn babies. Early postnatal care refers to health care services provided to the mother and newborn baby by health care professionals within the first weeks after giving birth.<sup>2,5</sup>

Globally, 30% of mothers follow postnatal care, thus 13% of the postnatal follow-up in sub-Saharan Africa.<sup>6</sup> Research findings also showed that the prevalence of early postnatal care utilization varied to a certain extent among regions in Africa. For instance, Uganda,<sup>7</sup> and South Sudan,<sup>8</sup> reported 15.4% and 11.4%, respectively. It also noted variations in research conducted in Ethiopia, like Southern Ethiopia at Hawassa Zuria,<sup>9</sup> and Wonago District,<sup>10</sup> North Ethiopia,<sup>11</sup> reported 29.7%,13.7%, and 34.3%, respectively.

Globally, every year, three million infants die in the first week of life, and 900 000 die in the next three weeks.<sup>12,13</sup> According to a united nations international children emergency fund (UNICEF) report in Ethiopia, nearly 240 babies will die each day before reaching their first month of life.<sup>14</sup> The Ethiopian demographic and health survey( EDHS) 2019 report, revealed that the neonatal mortality rate (NMR) of the country is 29 deaths per 1,000 live births,<sup>15,16</sup> neonatal deaths occur at birth and early postnatal period due to inadequacy of care.<sup>17,18</sup>

In developing countries, different factors decrease early postnatal care services utilization like home delivery, illiteracy, low income, and cultures.<sup>19,20</sup> This makes the early postnatal care

1  
2  
3 services program the weakest of all reproductive and child health programs. Because of low  
4 adherence to recommended postnatal care (PNC) regimens, women in sub-Saharan Africa posed  
5 a significant risk to infant and maternal morbidities and mortality.<sup>21</sup>  
6  
7

8  
9  
10 Despite the establishment of several global and national initiatives to improve maternal and child  
11 health, maternal mortality and mortality is continued as a global challenge.<sup>3</sup> Early postnatal care  
12 service is the most important maternal and child health care service to detect early maternal and  
13 newborn danger signs and complications by health care providers.<sup>22</sup>  
14  
15

16  
17  
18 Even though a high prevalence of maternal and neonatal morbidity and mortality during the early  
19 postnatal period, it has done inadequate studies in underdeveloped and developing countries in  
20 Africa. In Ethiopia, there are different sociocultural beliefs and sociodemographic variations that  
21 affect healthcare services utilization that creates evidence gaps between and within the  
22 population. However, the prevalence of early postnatal care services utilization and associated  
23 factors among postnatal women were not well known in Ethiopia. Therefore this study should be  
24 filled the evidence gap on EPNC service utilization among postnatal mothers. Identification of  
25 factors associated with EPNC service utilization among postnatal mothers is imperative to  
26 develop intervention strategies and measures to mitigate its public health impact. Thus, this study  
27 aimed to assess the prevalence of early postnatal care services utilization and associated factors  
28 among postnatal women of Wolkite town.  
29  
30  
31  
32  
33  
34  
35  
36  
37  
38  
39  
40  
41  
42  
43  
44  
45  
46  
47  
48  
49  
50  
51  
52  
53  
54  
55  
56  
57  
58  
59  
60

## METHODS AND MATERIALS

### Study design and setting

A community-based cross-sectional study was conducted from 15 May to 15 June 2021, at Wolkite Town, southern Ethiopia. Wolkite is the capital city of the Gurage zone. Wolkite town is located 158 km southwest of Addis Ababa, the capital city of Ethiopia. According to the 2007 Census conducted by the Central Statistical Agency of Ethiopia, Wolkite town has a total population of 28,856 of whom 15,068 were males and 13,788 females (24) residents served by one public hospital, three health centers, and nine private clinics.

### Source and study population

Postnatal mothers aged 18 years with a birth within the last 12 months living in the town, and it's selected the sub-cities, where the source and study populations, respectively. We excluded individuals who gave birth over 12 months and were critically ill during the data collection period for the study.

### Patient and public involvement

Patients were not involved in the study

### Sample size determination

The minimum sample size required for the study was determined by using a single population proportion formula  $n = \frac{(Z_{\alpha/2})^2 p(1-p)}{d^2}$  with assumptions of 95% confidence interval (CI), 0.05 margin of error and established prevalence ( $p=23.7\%$ ) of early postnatal-care service utilization and its associated factors among mothers in Hawassa Zuria District, Sidama Regional State, Ethiopia,<sup>9</sup> with adding a 10% non-response rate. Based on the above assumption consideration the final sample size became ( $n=306$ ).

### Sampling techniques

We got the list of women who gave birth in the last 12 months from delivery registers and cross-checked it with the community health information system (CHIS) of health posts. Wolkite town has 11 kebeles, from that 4 were selected using the lottery method, and then a sample was allocated proportionally to the selected kebeles. After the proportional allocation of the sample for the selected kebeles, we employed a systematic random sampling technique to include 301 participants. The sampling fraction (K) was  $N/n = 904/306 = 3$ . Then, the lottery method was employed to identify the first postnatal mother to be interviewed and 3 were drawn from whom the interview started. Postnatal women were identified, and we held an interview every three intervals. Hence, five (5) study participants were non-respondents after three consecutive home visits.

### Data collection instruments and procedures

The data collection tool was prepared in English after reviewing related literature and translated into the Amharic language. The questionnaire comprised socio-demographic characteristics, obstetrics characteristics, service-related characteristics, and sources of knowledge about early postnatal care (Annex 1). Data were collected using a pre-tested structured interviewer-administered questionnaire. To assure the quality of data: Four diploma midwives had trained for data collection and two BSc midwives were assigned as a supervisor under the supervision of the principal investigator. Filled questionnaires were daily checked for completeness and consistency. Cronbach's alpha value, which was 0.78, checked the reliability of the questionnaire.

## Study variables and data measurement

The dependent variable was early postnatal care utilization. Independent variables were as follows: socio-demographic characteristics (Age, Marital status, religion, ethnicity, educational level, occupational status, Husbands educational status, Husbands occupation, Estimated monthly income, and Family size), Obstetrics characteristics (Gravidity, Parity, Having ANC visit, Number of visits, Place of last ANC visit, Course of pregnancy, Place of delivery, Delivery attendant, Mode of delivery, Birth outcome, Any history of neonatal death, Wantedness of pregnancy, Getting advice on importance of PNC, Maternal complication during postnatal period, and Newborns complication during pregnancy), Service-related characteristics (Means of transportation, Decision maker on maternity care, Getting help for health services, Maternity waiting room, Duration of stay) and Sources of knowledge (Know the advantages of PNC, Know the recommended postnatal visits, Know the correct timing of PNC, Knows that PNC is free service, Knows at least one components of the service, Knows at least one newborn danger signs, Know consequences of not receiving recommended PNC, Place where PNC is delivered).

**Early postnatal care utilization:** In this study, if a mother had at least one postnatal care check-up for the last delivery by skilled health care providers within 7 days after delivery, “Yes for early postnatal care utilization, otherwise no”<sup>7,23,24</sup>.

**Skilled health care providers:** Include (Nurses, Midwives, Health Officers, HEW, and Doctors)<sup>25</sup>.

## Data management and analysis

Data were cleaned and entered into Epi Data 3.1 and exported to SPSS 23 for analysis. The data was cleaned by running frequency, checking missing values, and the presence of outliers. We summarized the proportions of categorical variables by using mean with standard deviation (SD) based on the distribution of data for continuous variables. Normality was checked using the Shapiro–Wilk test. The factors associated with the dependent variable were analyzed using binary logistic regression. Bivariate analysis, crude odds ratio (COR) with 95% CI, was used to see the association between the outcome variable with each independent variable. Variables with a p-value of  $\leq 0.25$  in the bivariate analysis were selected for the multivariable logistic regression model. Multi-collinearity was checked to see the linear correlation among the independent

1  
2  
3 variables. Model goodness of fitness was tested by Hosmer-Lemeshow statistics. The strength of  
4 the association between dependent and independent variables was assessed using an adjusted  
5 odds ratio (AOR) with a 95% confidence interval. The p-value <0.05 was considered statistically  
6 significant.  
7  
8  
9

10  
11  
12  
13  
14  
15  
16  
17  
18  
19  
20  
21  
22  
23  
24  
25  
26  
27  
28  
29  
30  
31  
32  
33  
34  
35  
36  
37  
38  
39  
40  
41  
42  
43  
44  
45  
46  
47  
48  
49  
50  
51  
52  
53  
54  
55  
56  
57  
58  
59  
60

For peer review only



## RESULTS

### Socio-demographic characteristics

A total of 301 study participants were involved in this study, with a response rate of 98.4%. the majority of the respondents 280(93.0%) were married, 144(47.8%) of the respondents were Orthodox religion followers, 275(91.4%) were Gurage by ethnicity, 142(47.2%) had no formal education, more than two-thirds, 188 (62.5%) of the participant were housewife, more than two-fifth, 129(42.9%) of husbands of the respondents had no formal education, almost three-fourth, 225(74.8%) of the respondent were farmers and nearly one-half, 149(49.5%) of the respondents' had income below the mean level (597.4 birrs). The minimum and maximum numbers of family sizes were 2 and 8, respectively, with a mean of  $4\pm$  (standard deviation of 1) (**Table 1**).

Table 1: Socio-demographic characteristics of early postnatal care services utilization among postnatal women in Wolkite town, southeast Ethiopia, 2021 (n=301)

| Category                   | Frequency | Percent (%) |
|----------------------------|-----------|-------------|
| <b>Age of the mother</b>   |           |             |
| Less than 20               | 22        | 7.3         |
| 20-34                      | 206       | 68.4        |
| ≥35                        | 73        | 24.3        |
| <b>Marital status</b>      |           |             |
| Married                    | 280       | 93          |
| Unmarried                  | 13        | 4.3         |
| Divorced                   | 6         | 2.0         |
| Widowed                    | 2         | 0.7         |
| <b>Religion</b>            |           |             |
| Orthodox                   | 144       | 47.8        |
| Muslim                     | 122       | 40.5        |
| Protestant                 | 31        | 10.3        |
| Catholic                   | 4         | 1.3         |
| <b>Ethnicity</b>           |           |             |
| Gurage                     | 275       | 91.4        |
| Amhara                     | 24        | 8.0         |
| Oromo                      | 2         | 0.7         |
| <b>Educational status</b>  |           |             |
| No formal education        | 142       | 47.2        |
| Grade 1-8                  | 70        | 23.3        |
| Secondary 9-12             | 77        | 25.6        |
| College and above          | 12        | 4.0         |
| <b>Occupational status</b> |           |             |
| Housewife                  | 188       | 62.5        |
| Civil servant              | 11        | 3.7         |
| Merchant                   | 76        | 25.2        |

|                                    |     |      |
|------------------------------------|-----|------|
| Daily laborer                      | 18  | 6.0  |
| Farmer                             | 8   | 2.7  |
| <b>Husbands educational status</b> |     |      |
| No formal education                | 129 | 42.9 |
| Grade 1-8                          | 108 | 35.9 |
| Secondary 9-12                     | 53  | 17.6 |
| College and above                  | 11  | 3.7  |
| <b>Husbands occupation</b>         |     |      |
| Farmer                             | 225 | 74.8 |
| Civil servant                      | 13  | 4.3  |
| Merchant                           | 55  | 18.3 |
| Daily laborer                      | 8   | 2.7  |
| <b>Monthly income</b>              |     |      |
| Below average (597.4 ETB)          | 149 | 49.5 |
| More than average (597.4 ETB)      | 152 | 50.5 |
| <b>Family size</b>                 |     |      |
| Less than average (4)              | 154 | 51.2 |
| More than average (4)              | 147 | 48.8 |

## Obstetrics related characteristics

Among the respondents, almost two-fifths, 119(39.5%) had been pregnant for the first time and more than four-fifths, 268(89.0%) had ANC visits. Of the ANC attendants, 83(30.9%) have one ANC visit and 80(29.8%) have four and above visits. Regarding the place of the last ANC visit, 208(77.6%) was at the health center. Related to the course of pregnancy, almost two-fifths, 112(37.2%) of the respondents had a complicated pregnancy, four-fifths, 236(78.4%) of the respondents were given birth at a health center and most of the respondents, 284(94.4%) were attended by health professionals. According to the mode of delivery, more than four-fifths, 254(84.4%) of the respondents were delivered by SVD (**Table 2**).

### Maternal complications

Among the respondents, 18.3% had maternal complications' during the early postnatal period. Of the complications 4.3% were sepsis, and 3.7% were PPH (**Figure 1**).

### Newborn complications

Among the respondents, 27.9% had newborn complications during the early postnatal period. Of the complications, 16.3% were unable to breastfeed, and 7% were having breathing difficulties (**Figure 2**).

Table 2: Obstetrics characteristics of early postnatal care services utilization among postnatal women in Wolkite town, Gurage zone, southeast Ethiopia, 2021(n=301)

| Variables           | Category                 | Frequency | Percentage |
|---------------------|--------------------------|-----------|------------|
| Gravidity           | One                      | 119       | 39.5       |
|                     | 2-4                      | 106       | 35.2       |
|                     | ≥5                       | 76        | 25.2       |
| Parity              | One                      | 119       | 39.5       |
|                     | 2-4                      | 106       | 35.2       |
|                     | ≥5                       | 76        | 25.2       |
| Having ANC visit    | Yes                      | 268       | 89.0       |
|                     | No                       | 33        | 11.0       |
| Number of visits    | One                      | 83        | 31         |
|                     | Two                      | 55        | 20.5       |
|                     | Three                    | 50        | 18.6       |
|                     | Four and above           | 80        | 29.8       |
| Place of ANC visit  | Health center            | 208       | 77.6       |
|                     | Hospital                 | 51        | 19         |
|                     | Health post              | 9         | 3.3        |
| Course of pregnancy | Complicated              | 112       | 37.2       |
|                     | Un complicated           | 189       | 62.8       |
| Place of delivery   | Health center            | 236       | 78.4       |
|                     | Hospital                 | 50        | 16.6       |
|                     | Health post              | 6         | 2.0        |
|                     | Home                     | 9         | 3.0        |
| Delivery attendant  | Health professionals     | 284       | 94.4       |
|                     | Health extension workers | 15        | 5.0        |
|                     | Others                   | 2         | 0.7        |
| Mode of delivery    | SVD                      | 254       | 84.4       |
|                     | Instrumental delivery    | 16        | 5.3        |

|                                                    |            |     |      |
|----------------------------------------------------|------------|-----|------|
|                                                    | CS         | 31  | 10.3 |
| Birth outcome                                      | Live birth | 292 | 97   |
|                                                    | Stillbirth | 9   | 3.0  |
| Any history of neonatal death                      | Yes        | 10  | 3.3  |
|                                                    | No         | 291 | 96.7 |
| Wantedness of pregnancy                            | Wanted     | 222 | 73.8 |
|                                                    | Unwanted   | 79  | 26.2 |
| Getting advice on the importance of PNC            | Yes        | 167 | 55.5 |
|                                                    | No         | 134 | 44.5 |
| Maternal complications during the postnatal period | Yes        | 55  | 18.3 |
|                                                    | No         | 246 | 81.7 |
| Newborns complication during pregnancy             | Yes        | 84  | 27.9 |
|                                                    | No         | 217 | 72.1 |

## Service-related characteristics

Among the respondents, more than two-thirds, 190(63.1%) of the respondents traveled by foot to the health facility, while more than two-fifths, 141(46.8%) of respondents decided by themselves to have early PNC. More than two-thirds, 228(75.7%) of the respondents were getting help from their husbands about health services. Of those who used the maternity waiting room, 50(16.6%) stayed for less than a week and 40(13.3%) stayed for one week (**Table 3**).

Table 3: Service-related characteristics of early postnatal care services utilization among postnatal women in Wolkite town, Gurage zone, southeast Ethiopia, 2021(n=301)

| Variables                        | Category         | Frequency | Percentage |
|----------------------------------|------------------|-----------|------------|
| Means of transportation          | Foot             | 190       | 63.1       |
|                                  | Vehicles         | 111       | 36.9       |
| Decision maker on maternity care | Herself          | 141       | 46.8       |
|                                  | Husband          | 49        | 16.3       |
|                                  | Joint decision   | 111       | 36.9       |
| Getting help for health services | Husband          | 228       | 75.7       |
|                                  | Relatives        | 65        | 21.6       |
|                                  | Families         | 8         | 2.7        |
| Maternity waiting room           | Yes              | 90        | 29.9       |
|                                  | No               | 211       | 70.1       |
| Duration of stay (n=90)          | Less than a week | 50        | 55.6       |
|                                  | For one week     | 40        | 44.4       |

## Sources of knowledge about early PNC

Among the respondents, 220(70.9%) have information about early postnatal care (EPNC) services. Most of the respondents, 150 (68.2%) acquired information about EPNC utilization from television. Nearly one-fifth, 81(26.9%) of the respondents have not known the advantages of postnatal care, and four-fifth, 243(80.7%) of the respondents were known of recommended postnatal visits. Nearly four-fifths, 256(85.0%) of the respondents did not know the correct time of early PNC service utilization. Nearly one-half, 133 (44.2%) of the respondents knew that EPNC was a free service, and nearly two-thirds, 188(62.5%) of the respondents did not know at least one component of the service (**Table 4**).

Table 4: Knowledge about early postnatal care services utilization among postnatal women in Wolkite town, southeast Ethiopia, 2021(n=301)

| Variables                                   | Category | Frequency(n) | Percentage (%) |
|---------------------------------------------|----------|--------------|----------------|
| Know the advantages of PNC                  | Yes      | 220          | 73.1           |
|                                             | No       | 81           | 26.9           |
| Know the recommended postnatal visits       | Yes      | 58           | 19.3           |
|                                             | No       | 243          | 80.7           |
| Know the correct timing of PNC              | Yes      | 45           | 15.0           |
|                                             | No       | 256          | 85.0           |
| Knows that PNC is a free service            | Yes      | 133          | 44.2           |
|                                             | No       | 168          | 55.8           |
| Knows at least one component of the service | Yes      | 113          | 37.5           |
|                                             | No       | 188          | 62.5           |
| Knows at least one newborn danger signs     | Yes      | 150          | 49.8           |



|                                        |     |     |      |
|----------------------------------------|-----|-----|------|
|                                        | No  | 151 | 50.2 |
| Know the consequences of not receiving | Yes | 48  | 15.9 |
| recommended PNC                        | No  | 253 | 84.1 |
| Place where PNC is delivered           | Yes | 102 | 33.9 |
|                                        | No  | 199 | 66.1 |

For peer review only

### Factors associated with early postnatal care service utilization among participants

On bivariate analysis monthly income, Gravidity, parity, the desire of pregnancy, ANC follow-up, mode of delivery, any newborn illness/complication, Obstetrics complication, and knowledge of PNC were candidates for multivariate analysis. On multivariable analysis gravidity, the desire for pregnancy and mode of delivery were statistically significant in the final model (**Table 5**).

#### Multivariable analysis

Of the total participant, 76(25.2%) had more than 4 pregnancies and were 2.90 times (AOR: 2.90; 95%CI: 1.18, 7.11) more likely to utilize EPNC when compared to women who had less than or equal to four pregnancies. On the other hand, participants who have the desire for pregnancy were 4.17 times (AOR: 4.17; 95%CI: 1.93, 9.03) more likely when compared to those who haven't the desire for pregnancy. On the other hand, participants who gave birth by SVD were 2.18 times (AOR: 2.18; 95%CI: 1.07, 9.39) more likely when compared to those who gave birth by CS.

Table 5: Factors associated with early postnatal care services utilization among postnatal women in Wolkite town, southeast Ethiopia, 2021(n=301)

| Variables                       | EPNC Utilization |     | COR (95%CI)      | AOR (95%CI)             | P-value       |
|---------------------------------|------------------|-----|------------------|-------------------------|---------------|
|                                 | Yes              | No  |                  |                         |               |
| <b>Estimated monthly income</b> |                  |     |                  |                         |               |
| Below average                   | 43               | 106 | 1                | 1                       |               |
| >Average                        | 75               | 77  | 2.40(1.49, 3.87) | 1.22(0.67, 2.23)        | 0.517         |
| <b>Gravidity</b>                |                  |     |                  |                         |               |
| One                             | 31               | 88  | 1                | 1                       |               |
| 2-4                             | 41               | 65  | 1.79(1.02, 3.15) | 1.22(0.54, 2.77)        | 0.629         |
| More than 4                     | 46               | 30  | 4.35(2.35, 8.06) | <b>2.90(1.18, 7.11)</b> | <b>0.020</b>  |
| <b>Parity</b>                   |                  |     |                  |                         |               |
| Primiparous                     | 35               | 84  | 1                | 1                       |               |
| Multiparous                     | 41               | 65  | 1.51(0.87, 2.64) | 1.18(0.51, 2.76)        | 0.699         |
| Grand Multiparous               | 42               | 34  | 2.97(1.63, 5.40) | 1.09(0.46, 2.62)        | 0.844         |
| <b>Desire of pregnancy</b>      |                  |     |                  |                         |               |
| Yes                             | 103              | 119 | 3.69(1.98, 6.87) | <b>4.17(1.93, 9.03)</b> | <b>0.0001</b> |
| No                              | 15               | 64  | 1                | 1                       |               |
| <b>Having ANC follow up</b>     |                  |     |                  |                         |               |
| Yes                             | 111              | 157 | 2.63(1.10, 6.26) | 0.39(0.12, 1.28)        | 0.121         |
| No                              | 7                | 26  | 1                | 1                       |               |
| <b>Course of pregnancy</b>      |                  |     |                  |                         |               |
| Complicated                     | 60               | 52  | 2.61(1.61, 4.23) | 1.57(0.85, 2.92)        | 0.151         |
| Uncomplicated                   | 58               | 131 | 1                | 1                       |               |

| <b>Mode of delivery</b>                 |     |     |                  |  |                         |              |
|-----------------------------------------|-----|-----|------------------|--|-------------------------|--------------|
| SVD                                     | 107 | 147 | 2.38(1.04, 6.01) |  | <b>2.18(1.07, 9.39)</b> | <b>0.038</b> |
| CS                                      | 11  | 36  | 1                |  | 1                       |              |
| <b>Any newborn illness/complication</b> |     |     |                  |  |                         |              |
| Yes                                     | 42  | 42  | 1.85(1.11, 3.09) |  | 1.59(0.84, 2.99)        | 0.155        |
| No                                      | 76  | 141 | 1                |  | 1                       |              |
| <b>Obstetrics complication</b>          |     |     |                  |  |                         |              |
| Yes                                     | 41  | 14  | 6.43(1.01, 9.48) |  | 9.12(0.34, 12.53)       | 0.0001       |
| No                                      | 77  | 169 | 1                |  | 1                       |              |
| <b>Knowledge on PNC</b>                 |     |     |                  |  |                         |              |
| Poor                                    | 45  | 115 | 1                |  | 1                       |              |
| Good                                    | 73  | 68  | 2.74(1.70, 4.42) |  | 1.86(0.99, 3.49)        | 0.051        |

Key: EPNC-Early Postnatal Care, \*-Pvalue<0.05, \*\*-Pvalue≤0.01

1  
2  
3  
4  
5  
6  
7  
8  
9  
10  
11  
12  
13  
14  
15  
16  
17  
18  
19  
20  
21  
22  
23  
24  
25  
26  
27  
28  
29  
30  
31  
32  
33  
34  
35  
36  
37  
38  
39  
40  
41  
42  
43  
44  
45  
46  
47  
48  
49  
50  
51  
52  
53  
54  
55  
56  
57  
58  
59  
60

For peer review only

## Discussion

Early postnatal care service utilization in developing countries is one of the health care service utilization problems among postnatal women, which is related to extensive maternal and neonatal complications and mortality.<sup>1, 2,6</sup> Prior studies have noted the importance of early postnatal checkups in improving maternal survival.<sup>7,26</sup> This study was intended to identify the prevalence of early postnatal care services utilization and associated factors among postnatal women in Wolkite Ethiopia.

This study revealed that 23.3 % (95% CI: 18.9-27.9) of women received early postnatal care. This result is lower than the study reported in some African countries such as Myanmar (72.1%),<sup>27</sup> Zambia (63%),<sup>28</sup> Builsa district (62%),<sup>29</sup> Hadiya Zone (51.4%),<sup>30</sup> Uganda (50%),<sup>7</sup> Assela town (37.5%),<sup>31</sup> Adigrat Town (34.3%),<sup>32</sup> and Debremarkos town (33.5%).<sup>33</sup> However, it is higher than the findings of studies conducted in China (17%),<sup>34</sup> Tanzania (10.4%),<sup>35</sup> South Sudan (11.4%), and 8 Debremarkos town in Ethiopia (16.2%).<sup>36</sup> The difference might be due to the analysis type employed in the studies and the socio-cultural background of the participants.

In this study wanted pregnancy was found to be an associated factor of early postnatal care services utilization. This finding is nearly similar to the studies conducted in Tanzania and Benin.<sup>35,37</sup> The various advantages of public enlightenment could explain this in planning for pregnancy. The difference between studies might be sample size; the sample size of this study was small, even if it was scientifically calculated; which might make variables insignificant.

This study revealed that having over four previous pregnancies was among the factors associated with early postnatal care services utilization. This shows that former pregnancies shared the experience of attending early postnatal checkups. This finding differed from that of

1  
2  
3 the studies conducted in Debre Birhan,<sup>38</sup> and Mekele city,<sup>39</sup> that study shows that mothers  
4 having one previous pregnancy used early PNC services on time. Socio-cultural differences  
5 study participants between the studies might attribute the differences between the studies. This  
6 may affect the decision power of women to use this service in some communities.  
7  
8  
9  
10  
11

12 This study revealed that spontaneous vaginal delivery (SVD) was among the factors  
13 associated with early postnatal care services utilization. Similarly, a study conducted by Debre  
14 Birhan and Debremarkos shows that clients who have previous experience with SVD were more  
15 likely to use early postnatal care services.<sup>33,38</sup> The difference between the studies might be  
16 attributed to sampling techniques and cultural differences of studies participant; those studies  
17 used a simple random sampling technique.  
18  
19  
20  
21  
22  
23  
24  
25  
26

### 27 **Strengths and limitations**

28  
29  
30 This study include mothers with birth within one year of the survey from the community to  
31 assess the prevalence of early postnatal care services utilization and associated factors and  
32 compare them with other studies.  
33

34 It may relate the limitation of this study to the survey types and nature of the cross-sectional  
35 study, which did not draw inferences and show cause-and-effect relations among variables. The  
36 sample size of this study was small, even if it was scientifically calculated. The study is further  
37 limited because it is based on retrospective information provided by the survey respondents,  
38 which may be subject to recall bias. However, such bias was tried to minimize some extent by  
39 restricting the study to mothers with birth within one year of the survey.  
40  
41  
42

### 43 **Conclusions**

44  
45 This study illustrates the prevalence of early postnatal care services utilization and the associated  
46 factors among postnatal women. This study revealed that the prevalence of early postnatal care  
47 services utilization was slightly low when compared to other studies. Wanted pregnancy, having  
48 over four previous pregnancies (> Gravida IV), and spontaneous vertex delivery (SVD) were  
49 significantly associated with early postnatal care services utilization.  
50  
51  
52  
53  
54  
55  
56  
57  
58  
59  
60

1  
2  
3 This study result revealed that almost all study participants' place of delivery was in a health  
4 institution, and only 15% of respondents know the correct follow-up schedules for early  
5 postnatal checkups, which is in contrast to the place of delivery. Thus, community-based health  
6 promotion should be an important recommendation to increase early postnatal care service  
7 utilization among postnatal mothers to improve the level of awareness of early postnatal checkup  
8 schedules; done by health care providers.  
9

### 13 **Competing interests**

14  
15  
16 The authors declare that there is no conflict of interest  
17

### 18 **Data sharing statement**

19  
20  
21 Our original article accepted by BMJ Open access journal entitled “Prevalence of early postnatal  
22 care services utilization and associated factors among postnatal women of Wolkite town, Gurage  
23 zone, Southern Ethiopia: a community-based cross-sectional study” data supporting results  
24 reports can be found in publicly archived generated in December 6, 2022 with hyperlinks  
25 provided below. We have decided to abandon the submission to Dryad and will proceed to the  
26 link below instead.  
27  
28  
29  
30  
31  
32  
33

34  
35  
36  
37 <https://zenodo.org/record/7404686#.Y4819r1KjIV>.  
38

### 39 **Funding**

40  
41  
42 This work was not supported by any funding agency in the public, commercial or not-for-profit  
43 sectors.  
44  
45  
46  
47  
48  
49  
50  
51  
52  
53  
54  
55  
56  
57  
58  
59  
60



## Ethical approval and consent to participants

Ethics approval: We got ethical clearance from the institutional review board of Wolkite University College of Medicine and Health Science with the reference number RCSUILC/021/2021.

Informed consent: A permission letter was obtained from Wolkite town administration office authorities. Participation in the study was voluntary and written informed consent was obtained from the study participants. We kept all the information taken from the study participants confidential.

## Authors' Contribution

**Planning:** Yirgalem Yosef Lamiso, Mebratu Demissie Senbata, Seblework Abeje Abiy, Mariama Shifa Mohamed

**Methodology:** Yirgalem Yosef Lamiso, Mebratu Demissie Senbata, Seblework Abeje Abiy

**Data curation:** Fantahun Walle Berriera, Shegaw Geze Tenaw, Aberash Beyene Deribew,

**Formal analysis:** Yirgalem Yosef Lamiso, Mebratu Demissie Senbeta, Seblework Abeje Abiy

**Investigation:** Yirgalem Yosef Lamiso, Mebratu Demissie Senbata, Seblework Abeje Abiy

**Software:** Yirgalem Yosef Lamiso, Mebratu Demissie Senbata

**Supervision:** Fantahun Walle Berriera, Shegaw Geze Tenaw, Aberash Beyene Deribew

**Validation:** Yirgalem Yosef Lamiso Mebratu Demissie Senbata, Seblework Abeje Abiy

**Visualization:** Mebratu Demissie Senbeta, Seblework Abeje Abiy, Shegaw Geze Tenaw

**Writing – review & editing:** Yirgalem Yosef Lamiso Mebratu Demissie Senbata

## Funding

The authors have not declared a specific grant for this research from any funding agency in the public, commercial or not-for-profit sectors.

## Acknowledgments

We would like to thank Wolkite University, Wolkite town administrator, study participants, and data collectors.

## References

1. WHO. Trends in maternal mortality. 2018; <https://documents1.worldbank.org/curated/en/793971568908763231/pdf/Trends-in-maternal-mortality-2000-to-2017-Estimates-by-WHO-UNICEF-UNFPA-World-Bank-Group-and-the-United-Nations-Population-Division.pdf>.
2. WHO. WHO recommendations on Postnatal care of the mother and newborn. 2014.
3. WHO U. UNFPA, World Bank Group, and the United Nations Population Division. Trends in maternal mortality: 1990 to 2015. Estimates by WHO, UNICEF. In: UNFPA, World Bank Group, and the United Nations Population Division. Geneva; 2015.
4. Organization WH. Health in 2015: from MDGs, millennium development goals to SDGs, sustainable development goals. 2015.
5. WHO. Postnatal Care for Mothers and Newborns Highlights from the World Health Organization 2013 Guidelines. 2015.
6. Odukogbe A-TA, Afolabi BB, Bello OO, Adeyanju AS. Female genital mutilation/cutting in Africa. *Translational Andrology and Urology*. 2017;6(2):138-148.
7. USAID'S. Determinants of Early Postnatal Care Attendance in Uganda. 2016.
8. Izudi J, Akwang GD, Amongin D. Early postnatal care use by postpartum mothers in Mundri East County, South Sudan. *BMC Health Services Research*. 2017;17(1).
9. Yoseph S, Dache A, Dona A. Prevalence of Early Postnatal-Care Service Utilization and Its Associated Factors among Mothers in Hawassa Zuria District, Sidama Regional State, Ethiopia: A Cross-Sectional Study. 2021.

10. Tefera Y, Hailu S, Tilahun aR. Early postnatal care service utilization and its determinants among women who gave birth in the last 6 months in Wonago district, south Ethiopia: A community-based cross-sectional study. 2020.
11. Gebreslassie T, Gebrehiwot, Mekonen HH. Prevalence and Associated Factors of Early Postnatal Care Service Use Among Mothers Who Had Given Birth Within the Last 12 Months in Adigrat Town, Tigray, Northern Ethiopia, 2018.
12. WHO. WHO Technical Consultation on Postpartum and Postnatal Care. 2010; [http://apps.who.int/iris/bitstream/handle/10665/70432/WHO\\_MPS\\_10.03\\_eng.pdf;jsessionid=977EC87BBE162C1694EBAB559E4D335A?sequence=1](http://apps.who.int/iris/bitstream/handle/10665/70432/WHO_MPS_10.03_eng.pdf;jsessionid=977EC87BBE162C1694EBAB559E4D335A?sequence=1), 2018.
13. Collaboration Ct. Countdown to 2030: tracking progress towards universal coverage for reproductive, maternal, newborn, and child health. *The Lancet*. 2018.
14. UNICEF. Maternal and Newborn Health Disparities in Ethiopia, Unicef for every child. 2017; [https://data.unicef.org/wp-content/uploads/country\\_profiles/Ethiopia/country%20profile\\_ETH.pdf](https://data.unicef.org/wp-content/uploads/country_profiles/Ethiopia/country%20profile_ETH.pdf). Accessed 11/28, 2018.
15. CSAE. Central statistics agency of Ethiopia, Ethiopia Demographic and Health Survey 2016. Addis Ababa, Ethiopia, and Rockville, Maryland, USA: CSA and ICF. . 2016; <https://dhsprogram.com/pubs/pdf/FR328/FR328.pdf>. Accessed 12/21/2018, 2018.
16. WHO. global strategies for women, children, and adolescents (2016-2030). 2016. Accessed 12/6/2018, 2018.
17. Darmstadt GL, Bhutta ZA, Cousens S, et al. Evidence-based, cost-effective interventions: how many newborn babies can we save? *The Lancet*. 2005;365(9463):977-988.
18. WHO/UNICEF. Home visits for the newborn child: a strategy to improve survival. 2010; [http://apps.who.int/iris/bitstream/handle/10665/70002/WHO\\_FCH\\_CAH\\_09.02\\_eng.pdf?sequence=1](http://apps.who.int/iris/bitstream/handle/10665/70002/WHO_FCH_CAH_09.02_eng.pdf?sequence=1). Accessed 11/28, 2018.
19. DiBari JN, Yu SM, Chao SM, Lu MC. Use of postpartum care: predictors and barriers. *Journal of pregnancy*. 2014;2014.
20. Organization WH. Every newborn: an action plan to end preventable deaths. 2014.
21. WHO. WHO recommendations on maternal health: guidelines approved by the WHO Guidelines Review Committee. 2017; <http://apps.who.int/iris/bitstream/handle/10665/259268/WHO-MCA-17.10-eng.pdf?sequence=1>. Accessed NOV 28, 2018.
22. WHO. Technical Consultation on Postpartum and Postnatal Care. 2010.
23. Ndugga P, Namiyonga NK, Sebuwufu D. Determinants of early postnatal care attendance: analysis of the 2016 Uganda demographic and health survey. *BMC Pregnancy and Childbirth*. 2020;20(1).
24. An T, D N, A T. Early Postnatal Care Service Utilization and Associated Factors among Mothers Who Gave Birth in the Last 12 Months in Asako District, Arsi Zone, South East Ethiopia in 2016. *Journal of Women's Health Care*. 2017;06(01).
25. EDHS. Ethiopia demographic and health survey 2016.
26. Izudi J, Denise G, Amongin D. Early postnatal care use by postpartum mothers in Mundri East County, South Sudan. 2017.
27. Mon AS, Phyu MK, Thinkhamrop W, Thinkhamrop B. women and its determinants: a cross-sectional study. 2018.

- 1  
2  
3 28. Chungu C, Makasa M, Chola M, Jacobs CN. Place of Delivery Associated With Postnatal  
4 Care Utilization Among Childbearing Women in Zambia. *Frontiers in Public Health*.  
5 2018;6(94).  
6  
7 29. Sakeah E, Aborigo R, Sakeah JK, et al. The role of community-based health services in  
8 influencing postnatal care visits in the Builsa and the West Mamprusi districts in rural  
9 Ghana. *BMC pregnancy and childbirth*. 2018;18(1):295.  
10  
11 30. Belachew T, Taye A, Belachew T. Postnatal care service utilization and associated  
12 factors among mothers in Lemo Woreda, Ethiopia. *J Women's Health Care*.  
13 2016;5(10.4172):2167-0420.1000318.  
14  
15 31. Amane Tumbure<sup>1</sup> DA, Elile Fantahun<sup>1</sup>, Megersa Negusu<sup>1</sup>, Tsegaw Yitbarek<sup>1</sup>, Legese  
16 Tadesse<sup>2\*</sup> and Tewodros Desalegn<sup>2</sup> Assessment of Postnatal Care Service Utilization  
17 and Associated Factors in Asella Town, Arsi Zone, Oromiya Regional State, Ethiopia.  
18 *Global Journal of Reproductive medicine*. 2018;6(1).  
19  
20 32. Gebreslassie T, Haftea G, Mekonen H. Prevalence and Associated Factors of Early  
21 Postnatal Care Service Use Among Mothers Who Had Given Birth Within the Last 12  
22 Months in Adigrat Town, Tigray, Northern Ethiopia, 2018.  
23  
24 33. Limenih MA, Endale ZM, Dachew BA. Postnatal Care Service Utilization and  
25 Associated Factors among Women Who Gave Birth in the Last 12 Months before the  
26 Study in Debre Markos Town, Northwestern Ethiopia: A Community-Based Cross-  
27 Sectional Study. *International Journal of Reproductive Medicine*. 2016;2016:1-7.  
28  
29 34. You H, Chen J, Bogg L, et al. Study on the factors associated with postpartum visits in  
30 rural China. *PLoS One*. 2013;8(2):e55955.  
31  
32 35. Kanté AM, Chung CE, Larsen AM, Exavery A, Tani K, Phillips JF. Factors associated  
33 with compliance with the recommended frequency of postnatal care services in three  
34 rural districts of Tanzania. *BMC pregnancy and childbirth*. 2015;15(1):341.  
35  
36 36. Limenih MA, Endale ZM, Dachew BA. Postnatal Care Service Utilization and  
37 Associated Factors among Women Who Gave Birth in the Last 12 Months before the  
38 Study in Debre Markos Town, Northwestern Ethiopia: A Community-Based Cross-  
39 Sectional Study. *International Journal of Reproductive Medicine*. 2016;2016:7.  
40  
41 37. Dansou J, Adekunle AO, Arowojolu AO. Factors associated with the compliance of  
42 recommended first postnatal care services utilization among reproductive age women in  
43 the Benin Republic: an analysis of 2011/2012 BDHS data. *International Journal of  
44 Reproduction, Contraception, Obstetrics, and Gynecology*. 2017;6(4):1161-1169.  
45  
46 38. Akibu M, Tsegaye W, Megersa T, Nurgi S. Prevalence and Determinants of Complete  
47 Postnatal Care Service Utilization in Northern Shoa, Ethiopia. *Journal of pregnancy*.  
48 2018;2018.  
49  
50 39. Gebrehiwot G, Medhanyie AA, Gidey G, Abrha K. Postnatal care utilization among  
51 urban women in northern Ethiopia: a cross-sectional survey. *BMC women's health*.  
52 2018;18(1):78.  
53  
54  
55  
56  
57  
58  
59

## Legends:

1  
2  
3 Figure 1: Types of maternal complication among postnatal women in Wolkite town, southeast  
4 Ethiopia, 2021(n=301)  
5  
6

7  
8 Figure 2: Types of newborn complications during the postnatal period among postnatal women  
9 in Wolkite town, southeast Ethiopia, Ethiopia, 2021(n=301)  
10  
11  
12

13 Annex 1: English version interviewer-administered questionnaire on early postnatal care  
14 services utilization among postnatal women in southeast Ethiopia, 2021.  
15  
16  
17  
18  
19  
20  
21  
22  
23  
24  
25  
26  
27  
28  
29  
30  
31  
32  
33  
34  
35  
36  
37  
38  
39  
40  
41  
42  
43  
44  
45  
46  
47  
48  
49  
50  
51  
52  
53  
54  
55  
56  
57  
58  
59  
60

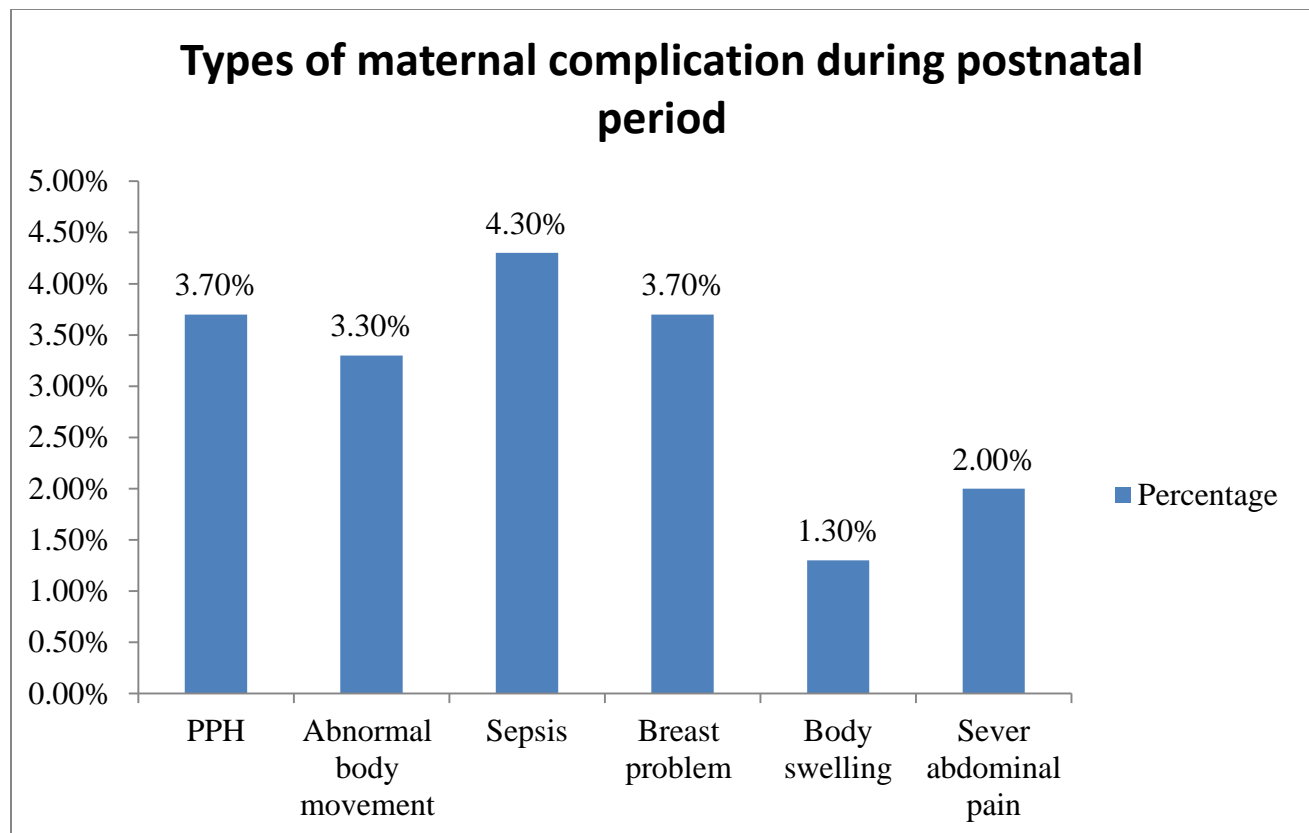

31  
32  
33  
34  
35  
36  
37  
38  
39  
40  
41  
42  
43  
44  
45  
46  
47  
48  
49  
50  
51  
52  
53  
54  
55  
56  
57  
58  
59  
60

Figure 1: Types of maternal complication among postnatal women in Wolkite town, southwest, Ethiopia, 2021(n=301)

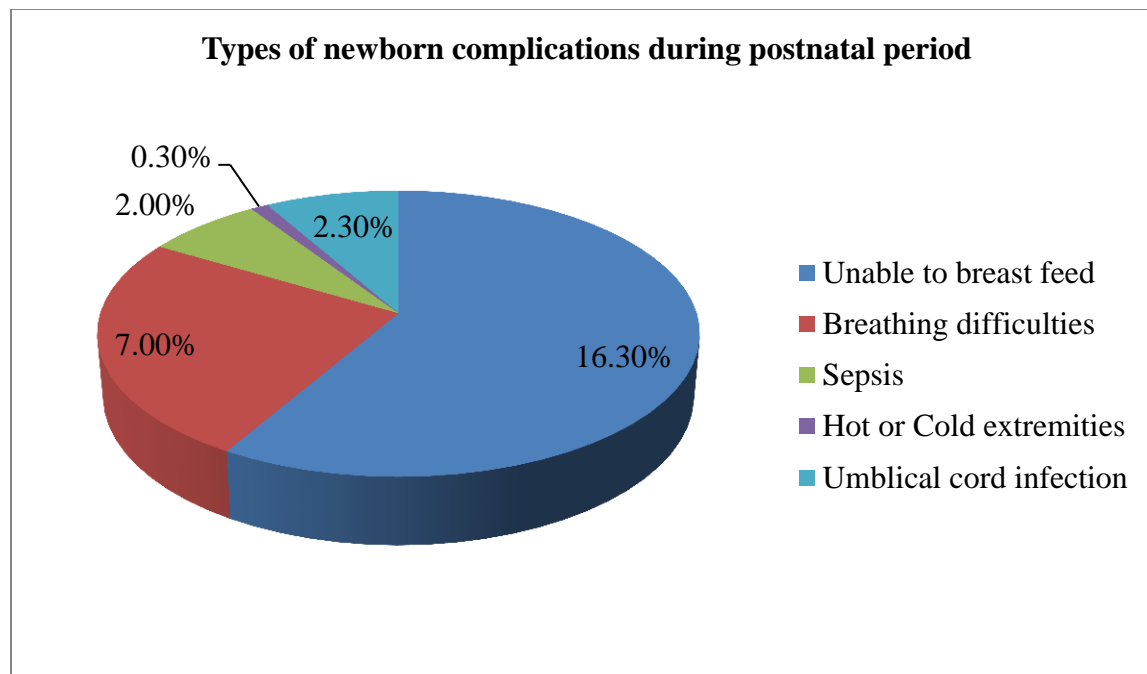

Figure 2: Types of newborn complications during postnatal period among postnatal women in Wolkite town, southwest Ethiopia, 2021(n=301)

## APPENDICES

**Annex 1: English version Interviewer Administered Questionnaire****Consent form for postnatal women:**

Title of research: Prevalence of early postnatal care utilization and associated factors among postnatal women in Wolkite town, Gurage zone, Southern Ethiopia, 2021

Hello my name is----- . I am working as data collector in the research conducted by Yirgalem Yosef. The research is only for academic purposes. I assure you that the views expressed in this questionnaire will under no circumstance be made public or disclosed to a third party. The details of this interview and the information you provide will be held in confidence.

**Declaration by Respondent**

I certify that I voluntarily agree to answer the research questions, that the study has been explained to me. All my questions have been answered satisfactorily. I understand I am free to discontinue participation at any time if I so choose.

.....

Signature

Date.....

**Researcher's Statement**

I certify that the participant has been given ample time to read, learn and understand the study. All questions and clarifications raised by the participant have been addressed.

.....

Yirgalem Yosef (Researcher)

Date.....

**Instruction:** Please **Circle the appropriate answer** in space provided

Questionnaire Code\_\_\_\_\_



**SECTION 1: Socio demographic characteristics**

| S.N | Questions                   | Answers                                                                                         | Skip |
|-----|-----------------------------|-------------------------------------------------------------------------------------------------|------|
| 101 | Age (in years)              | 1. [ _____ ]<br>2. I don't know-----                                                            |      |
| 102 | Current marital status      | 1. Married<br>2. Divorced /Separated<br>3. un married<br>4. Widowed                             |      |
| 103 | Religion                    | 1. Orthodox<br>2. Muslim<br>3. Catholic<br>4. Protestant<br>5. Others                           |      |
| 104 | Ethnicity                   | 1. Gurage<br>2. Amhara<br>3. Oromo<br>4. Others.                                                |      |
| 105 | Education status            | 1. No formal Education<br>2. 1-8 <sup>th</sup><br>3. 9-12 <sup>th</sup><br>4. College and above |      |
| 106 | Occupational status         | 1. House wife<br>2. Civil servant<br>3. Merchant<br>4. Daily labour<br>5. Farmer                |      |
| 107 | Husbands educational status | 1. No formal Education<br>2. 1-8 <sup>th</sup><br>3. 9-12 <sup>th</sup><br>4. College and above |      |

|                                                            |                          |                                                                                                                                     |             |
|------------------------------------------------------------|--------------------------|-------------------------------------------------------------------------------------------------------------------------------------|-------------|
| 108                                                        | Husbands occupations     | <ol style="list-style-type: none"> <li>1. Farmer</li> <li>2. Civil servant</li> <li>3. Merchant</li> <li>4. Daily labour</li> </ol> |             |
| 109                                                        | Estimated monthly income | <ol style="list-style-type: none"> <li>1. below average(597.4 ETB)</li> <li>2. More than average (597.4 ETB)</li> </ol>             |             |
| 110                                                        | Family size              | <ol style="list-style-type: none"> <li>1. less than average (4)</li> <li>2. more than average (4)</li> </ol>                        |             |
| <b>Section two: obstetric and neonatal characteristics</b> |                          |                                                                                                                                     | <b>Code</b> |
| 201                                                        | Gravidity                | -----                                                                                                                               |             |
| 202                                                        | Parity                   | -----                                                                                                                               |             |
| 203                                                        | Having ANC visit         | <ol style="list-style-type: none"> <li>1. Yes</li> <li>2. No</li> </ol>                                                             |             |
| 204                                                        | Number of ANC Visits     | <ol style="list-style-type: none"> <li>1. one</li> <li>2. two</li> <li>3. Three</li> <li>4. Four and above</li> </ol>               |             |
| 205                                                        | Place of last ANC visit  | <ol style="list-style-type: none"> <li>1. Health center</li> <li>2. Hospital</li> <li>3. Health post</li> </ol>                     |             |
| 206                                                        | Course of pregnancy      | <ol style="list-style-type: none"> <li>1. Complicated</li> <li>2. Uncomplicated</li> </ol>                                          |             |
| 207                                                        | Place of delivery        | <ol style="list-style-type: none"> <li>1. Health center</li> <li>2. Hospital</li> <li>3. 3. Health post</li> <li>4. Home</li> </ol> |             |
| 208                                                        | Delivery Attendant       | <ol style="list-style-type: none"> <li>1. Health professionals</li> <li>2. Health extension workers</li> <li>3. Other</li> </ol>    |             |
| 209                                                        | Mode of delivery         | <ol style="list-style-type: none"> <li>1. SVD</li> </ol>                                                                            |             |

|                                                                                          |                                            |                                               |               |
|------------------------------------------------------------------------------------------|--------------------------------------------|-----------------------------------------------|---------------|
|                                                                                          |                                            | 2. Instrumental delivery<br>3. CS             |               |
| 210                                                                                      | Birth outcome                              | 1. Live birth<br>2. Still birth               |               |
| 211                                                                                      | Any history of Neonatal death              | 1. Yes<br>2. No                               |               |
| 212                                                                                      | Wantedness of pregnancy                    | 1. Wanted<br>2. Unwanted                      |               |
| 213                                                                                      | Have you got advices on Importance of PNC? | 1. Yes<br>2. No                               |               |
| 214                                                                                      | New born complication during pregnancy     | 1. Yes<br>2. No                               |               |
| <b>Section three : Health service related factors (access to skilled maternity care)</b> |                                            |                                               | <b>Code</b>   |
| 301                                                                                      | Means of transportation                    | 1. Foot<br>1. Vehicle                         |               |
| 302                                                                                      | Decision maker on maternity care           | 1. Herself<br>2. Husband<br>3. Joint decision |               |
| 303                                                                                      | Getting help for health services           | 1. Husband<br>2. Relatives<br>3. Families     |               |
| 304                                                                                      | Using Maternity waiting room               | 1. Yes<br>2. No                               | If yes<br>305 |
| 305                                                                                      | Duration of stay                           | 1. Less than a week<br>2. For one week        |               |
| <b>Section four: knowledge of mothers towards early PNC service</b>                      |                                            |                                               | <b>Code</b>   |
| 401                                                                                      | Knows advantages of PNC                    | 1. Yes<br>1. No                               |               |
| 402                                                                                      | Knows Recommended PNC                      | 2. Yes<br>3. No                               |               |

|     |                                                    |                 |  |
|-----|----------------------------------------------------|-----------------|--|
| 403 | Know the correct timing of PNC                     | 1. Yes<br>2. No |  |
| 404 | Knows that PNC is free services                    | 1. Yes<br>1. No |  |
| 405 | Knows at least one component of the services       | 1. Yes<br>2. No |  |
| 406 | Knows at least on newborn danger sign              | 1. Yes<br>2. No |  |
| 407 | know consequences of not receiving recommended PNC | 1. Yes<br>2. No |  |
| 408 | Know place where PNC is delivered                  | 1. Yes<br>2. No |  |

**THANK YOU VERY MUCH!!!!!!**

# Reporting checklist for cross sectional study.

Based on the STROBE cross sectional guidelines.

## Instructions to authors

Complete this checklist by entering the page numbers from your manuscript where readers will find each of the items listed below.

Your article may not currently address all the items on the checklist. Please modify your text to include the missing information. If you are certain that an item does not apply, please write "n/a" and provide a short explanation.

Upload your completed checklist as an extra file when you submit to a journal.

In your methods section, say that you used the STROBE cross sectional reporting guidelines, and cite them as:

von Elm E, Altman DG, Egger M, Pocock SJ, Gøtzsche PC, Vandenbroucke JP. The Strengthening the Reporting of Observational Studies in Epidemiology (STROBE) Statement: guidelines for reporting observational studies.

|                           | Reporting Item                                                                                                                                     | Page Number            |
|---------------------------|----------------------------------------------------------------------------------------------------------------------------------------------------|------------------------|
| <b>Title and abstract</b> |                                                                                                                                                    |                        |
| Title                     | <a href="#">#1a</a> Indicate the study's design with a commonly used term in the title or the abstract                                             | 1&2                    |
| Abstract                  | <a href="#">#1b</a> Provide in the abstract an informative and balanced summary of what was done and what was found                                | 2                      |
| <b>Introduction</b>       |                                                                                                                                                    |                        |
| Background / rationale    | <a href="#">#2</a> Explain the scientific background and rationale for the investigation being reported                                            | 4&5                    |
| Objectives                | <a href="#">#3</a> State specific objectives, including any prespecified hypotheses                                                                | Highlighted on result. |
| <b>Methods</b>            |                                                                                                                                                    |                        |
| Study design              | <a href="#">#4</a> Present key elements of study design early in the paper                                                                         | 6                      |
| Setting                   | <a href="#">#5</a> Describe the setting, locations, and relevant dates, including periods of recruitment, exposure, follow-up, and data collection | 6                      |

|    |                        |                      |                                                                                                  |      |
|----|------------------------|----------------------|--------------------------------------------------------------------------------------------------|------|
| 1  | Eligibility criteria   | <a href="#">#6a</a>  | Give the eligibility criteria, and the sources and methods of selection of participants.         | 6    |
| 2  |                        |                      |                                                                                                  |      |
| 3  |                        |                      |                                                                                                  |      |
| 4  |                        | <a href="#">#7</a>   | Clearly define all outcomes, exposures, predictors, potential confounders, and effect modifiers. | 7    |
| 5  |                        |                      | Give diagnostic criteria, if applicable                                                          |      |
| 6  |                        |                      |                                                                                                  |      |
| 7  |                        |                      |                                                                                                  |      |
| 8  | Data sources /         | <a href="#">#8</a>   | For each variable of interest give sources of data and details of methods of assessment          | 6&7  |
| 9  | measurement            |                      | (measurement). Describe comparability of assessment methods if there is more than one            |      |
| 10 |                        |                      | group. Give information separately for for exposed and unexposed groups if applicable.           |      |
| 11 |                        |                      |                                                                                                  |      |
| 12 |                        |                      |                                                                                                  |      |
| 13 |                        |                      |                                                                                                  |      |
| 14 | Bias                   | <a href="#">#9</a>   | Describe any efforts to address potential sources of bias                                        | 8    |
| 15 |                        |                      |                                                                                                  |      |
| 16 |                        |                      |                                                                                                  |      |
| 17 | Study size             | <a href="#">#10</a>  | Explain how the study size was arrived at                                                        | 7    |
| 18 |                        |                      |                                                                                                  |      |
| 19 | Quantitative variables | <a href="#">#11</a>  | Explain how quantitative variables were handled in the analyses. If applicable, describe which   | 8    |
| 20 |                        |                      | groupings were chosen, and why                                                                   |      |
| 21 |                        |                      |                                                                                                  |      |
| 22 |                        |                      |                                                                                                  |      |
| 23 |                        |                      |                                                                                                  |      |
| 24 | Statistical methods    | <a href="#">#12a</a> | Describe all statistical methods, including those used to control for confounding                | 8    |
| 25 |                        |                      |                                                                                                  |      |
| 26 | Statistical methods    | <a href="#">#12b</a> | Describe any methods used to examine subgroups and interactions                                  | 8    |
| 27 |                        |                      |                                                                                                  |      |
| 28 |                        |                      |                                                                                                  |      |
| 29 | Statistical methods    | <a href="#">#12c</a> | Explain how missing data were addressed                                                          | n/a  |
| 30 |                        |                      |                                                                                                  |      |
| 31 |                        |                      |                                                                                                  |      |
| 32 | Statistical methods    | <a href="#">#12d</a> | If applicable, describe analytical methods taking account of sampling strategy                   | n/a  |
| 33 |                        |                      |                                                                                                  |      |
| 34 | Statistical methods    | <a href="#">#12e</a> | Describe any sensitivity analyses                                                                | n/a  |
| 35 |                        |                      |                                                                                                  |      |
| 36 |                        |                      |                                                                                                  |      |
| 37 | <b>Results</b>         |                      |                                                                                                  |      |
| 38 |                        |                      |                                                                                                  |      |
| 39 |                        |                      |                                                                                                  |      |
| 40 | Participants           | <a href="#">#13a</a> | Report numbers of individuals at each stage of study—eg numbers potentially eligible,            | 9    |
| 41 |                        |                      | examined for eligibility, confirmed eligible, included in the study, completing follow-up, and   |      |
| 42 |                        |                      | analysed. Give information separately for for exposed and unexposed groups if applicable.        |      |
| 43 |                        |                      |                                                                                                  |      |
| 44 |                        |                      |                                                                                                  |      |
| 45 |                        |                      |                                                                                                  |      |
| 46 | Participants           | <a href="#">#13b</a> | Give reasons for non-participation at each stage                                                 | 9    |
| 47 |                        |                      |                                                                                                  |      |
| 48 |                        |                      |                                                                                                  |      |
| 49 | Participants           | <a href="#">#13c</a> | Consider use of a flow diagram                                                                   | n/a  |
| 50 |                        |                      |                                                                                                  |      |
| 51 | Descriptive data       | <a href="#">#14a</a> | Give characteristics of study participants (eg demographic, clinical, social) and information on | 9-15 |
| 52 |                        |                      | exposures and potential confounders. Give information separately for exposed and unexposed       |      |
| 53 |                        |                      | groups if applicable.                                                                            |      |
| 54 |                        |                      |                                                                                                  |      |
| 55 |                        |                      |                                                                                                  |      |
| 56 |                        |                      |                                                                                                  |      |
| 57 | Descriptive data       | <a href="#">#14b</a> | Indicate number of participants with missing data for each variable of interest                  | n/a  |
| 58 |                        |                      |                                                                                                  |      |
| 59 |                        |                      |                                                                                                  |      |
| 60 |                        |                      |                                                                                                  |      |

|    |                   |                      |                                                                                                       |       |
|----|-------------------|----------------------|-------------------------------------------------------------------------------------------------------|-------|
| 1  | Outcome data      | <a href="#">#15</a>  | Report numbers of outcome events or summary measures. Give information separately for                 |       |
| 2  |                   |                      | exposed and unexposed groups if applicable.                                                           |       |
| 3  |                   |                      |                                                                                                       |       |
| 4  |                   |                      |                                                                                                       |       |
| 5  | Main results      | <a href="#">#16a</a> | Give unadjusted estimates and, if applicable, confounder-adjusted estimates and their                 | 11    |
| 6  |                   |                      | precision (eg, 95% confidence interval). Make clear which confounders were adjusted for and           |       |
| 7  |                   |                      | why they were included                                                                                |       |
| 8  |                   |                      |                                                                                                       |       |
| 9  |                   |                      |                                                                                                       |       |
| 10 |                   |                      |                                                                                                       |       |
| 11 | Main results      | <a href="#">#16b</a> | Report category boundaries when continuous variables were categorized                                 | 11    |
| 12 |                   |                      |                                                                                                       |       |
| 13 |                   |                      |                                                                                                       |       |
| 14 | Main results      | <a href="#">#16c</a> | If relevant, consider translating estimates of relative risk into absolute risk for a meaningful time | n/a   |
| 15 |                   |                      | period                                                                                                |       |
| 16 |                   |                      |                                                                                                       |       |
| 17 |                   |                      |                                                                                                       |       |
| 18 | Other analyses    | <a href="#">#17</a>  | Report other analyses done—e.g., analyses of subgroups and interactions, and sensitivity              | 18    |
| 19 |                   |                      | analyses                                                                                              |       |
| 20 |                   |                      |                                                                                                       |       |
| 21 |                   |                      |                                                                                                       |       |
| 22 |                   |                      |                                                                                                       |       |
| 23 | Discussion        |                      |                                                                                                       |       |
| 24 |                   |                      |                                                                                                       |       |
| 25 |                   |                      |                                                                                                       |       |
| 26 | Key results       | <a href="#">#18</a>  | Summarise key results with reference to study objectives                                              | 20-21 |
| 27 |                   |                      |                                                                                                       |       |
| 28 | Limitations       | <a href="#">#19</a>  | Discuss limitations of the study, taking into account sources of potential bias or imprecision.       | 21    |
| 29 |                   |                      | Discuss both direction and magnitude of any potential bias.                                           |       |
| 30 |                   |                      |                                                                                                       |       |
| 31 |                   |                      |                                                                                                       |       |
| 32 |                   |                      |                                                                                                       |       |
| 33 | Interpretation    | <a href="#">#20</a>  | Give a cautious overall interpretation considering objectives, limitations, multiplicity of analyses, | 20-21 |
| 34 |                   |                      | results from similar studies, and other relevant evidence.                                            |       |
| 35 |                   |                      |                                                                                                       |       |
| 36 |                   |                      |                                                                                                       |       |
| 37 | Generalisability  | <a href="#">#21</a>  | Discuss the generalisability (external validity) of the study results                                 | 22    |
| 38 |                   |                      |                                                                                                       |       |
| 39 |                   |                      |                                                                                                       |       |
| 40 | Other Information |                      |                                                                                                       |       |
| 41 |                   |                      |                                                                                                       |       |
| 42 |                   |                      |                                                                                                       |       |
| 43 | Funding           | <a href="#">#22</a>  | Give the source of funding and the role of the funders for the present study and, if applicable,      | n/a   |
| 44 |                   |                      | for the original study on which the present article is based                                          |       |
| 45 |                   |                      |                                                                                                       |       |
| 46 |                   |                      |                                                                                                       |       |

47 None The STROBE checklist is distributed under the terms of the Creative Commons Attribution License CC-BY. This checklist can be completed online  
 48 using <https://www.goodreports.org/>, a tool made by the [EQUATOR Network](#) in collaboration with [Penelope.ai](#)

49  
50  
51  
52  
53  
54  
55  
56  
57  
58  
59  
60
