# Supplementary material for: Prevalence of early postnatal care services usage and associated factors among postnatal women of Wolkite town, Gurage zone, Southern Ethiopia: a community-based cross-sectional study
Source: PubMed Central journal article supplement — BMJ Open. 2023 Jan 13;13(1):e061326. doi: 10.1136/bmjopen-2022-061326 (PMC9843198; doi:10.1136/bmjopen-2022-061326), 2023-01-13
Supplement: bmjopen-2022-061326supp001.pdf [file bmjopen-2022-061326supp001.pdf]

## APPENDICES

**Annex 1: English version Interviewer Administered Questionnaire****Consent form for postnatal women:**

Title of research: Prevalence of early postnatal care utilization and associated factors among postnatal women in Wolkite town, Gurage zone, Southern Ethiopia, 2021

Hello my name is------. I am working as data collector in the research conducted by Yirgalem Yosef. The research is only for academic purposes. I assure you that the views expressed in this questionnaire will under no circumstance be made public or disclosed to a third party. The details of this interview and the information you provide will be held in confidence.

**Declaration by Respondent**

I certify that I voluntarily agree to answer the research questions, that the study has been explained to me. All my questions have been answered satisfactorily. I understand I am free to discontinue participation at any time if I so choose.

.....

Signature

Date.....

**Researcher's Statement**

I certify that the participant has been given ample time to read, learn and understand the study. All questions and clarifications raised by the participant have been addressed.

.....

Yirgalem Yosef (Researcher)

Date.....

**Instruction:** Please **Circle the appropriate answer** in space provided

Questionnaire Code\_\_\_\_\_

| <b>SECTION 1: Socio demographic characteristics</b> |                             |                                                                                                 |      |
|-----------------------------------------------------|-----------------------------|-------------------------------------------------------------------------------------------------|------|
| S.N                                                 | Questions                   | Answers                                                                                         | Skip |
| 101                                                 | Age (in years)              | 1. [ _____ ]<br>2. I don't know-----                                                            |      |
| 102                                                 | Current marital status      | 1. Married<br>2. Divorced /Separated<br>3. un married<br>4. Widowed                             |      |
| 103                                                 | Religion                    | 1. Orthodox<br>2. Muslim<br>3. Catholic<br>4. Protestant<br>5. Others                           |      |
| 104                                                 | Ethnicity                   | 1. Gurage<br>2. Amhara<br>3. Oromo<br>4. Others.                                                |      |
| 105                                                 | Education status            | 1. No formal Education<br>2. 1-8 <sup>th</sup><br>3. 9-12 <sup>th</sup><br>4. College and above |      |
| 106                                                 | Occupational status         | 1. House wife<br>2. Civil servant<br>3. Merchant<br>4. Daily labour<br>5. Farmer                |      |
| 107                                                 | Husbands educational status | 1. No formal Education<br>2. 1-8 <sup>th</sup><br>3. 9-12 <sup>th</sup><br>4. College and above |      |

|                                                            |                          |                                                                                                                                     |             |
|------------------------------------------------------------|--------------------------|-------------------------------------------------------------------------------------------------------------------------------------|-------------|
| 108                                                        | Husbands occupations     | <ol style="list-style-type: none"> <li>1. Farmer</li> <li>2. Civil servant</li> <li>3. Merchant</li> <li>4. Daily labour</li> </ol> |             |
| 109                                                        | Estimated monthly income | <ol style="list-style-type: none"> <li>1. blow average(597.4 ETB)</li> <li>2. More than average (597.4 ETB)</li> </ol>              |             |
| 110                                                        | Family size              | <ol style="list-style-type: none"> <li>1. less than average (4)</li> <li>2. more than average (4)</li> </ol>                        |             |
| <b>Section two: obstetric and neonatal characteristics</b> |                          |                                                                                                                                     | <b>Code</b> |
| 201                                                        | Gravidity                | -----                                                                                                                               |             |
| 202                                                        | Parity                   | -----                                                                                                                               |             |
| 203                                                        | Having ANC visit         | <ol style="list-style-type: none"> <li>1. Yes</li> <li>2. No</li> </ol>                                                             |             |
| 204                                                        | Number of ANC Visits     | <ol style="list-style-type: none"> <li>1. one</li> <li>2. two</li> <li>3. Three</li> <li>4. Four and above</li> </ol>               |             |
| 205                                                        | Place of last ANC visit  | <ol style="list-style-type: none"> <li>1. Health center</li> <li>2. Hospital</li> <li>3. Health post</li> </ol>                     |             |
| 206                                                        | Corse of pregnancy       | <ol style="list-style-type: none"> <li>1. Complicated</li> <li>2. Uncomplicated</li> </ol>                                          |             |
| 207                                                        | Place of delivery        | <ol style="list-style-type: none"> <li>1. Health center</li> <li>2. Hospital</li> <li>3. 3. Health post</li> <li>4. Home</li> </ol> |             |
| 208                                                        | Delivery Attendant       | <ol style="list-style-type: none"> <li>1. Health professionals</li> <li>2. Health extension workers</li> <li>3. Other</li> </ol>    |             |
| 209                                                        | Mode of delivery         | <ol style="list-style-type: none"> <li>1. SVD</li> </ol>                                                                            |             |

|                                                                                          |                                            |                                               |               |
|------------------------------------------------------------------------------------------|--------------------------------------------|-----------------------------------------------|---------------|
|                                                                                          |                                            | 2. Instrumental delivery<br>3. CS             |               |
| 210                                                                                      | Birth outcome                              | 1. Live birth<br>2. Still birth               |               |
| 211                                                                                      | Any history of Neonatal death              | 1. Yes<br>2. No                               |               |
| 212                                                                                      | Wantedness of pregnancy                    | 1. Wanted<br>2. Unwanted                      |               |
| 213                                                                                      | Have you got advices on Importance of PNC? | 1. Yes<br>2. No                               |               |
| 214                                                                                      | New born complication during pregnancy     | 1. Yes<br>2. No                               |               |
| <b>Section three : Health service related factors (access to skilled maternity care)</b> |                                            |                                               | <b>Code</b>   |
| 301                                                                                      | Means of transportation                    | 1. Foot<br>1. Vehicle                         |               |
| 302                                                                                      | Decision maker on maternity care           | 1. Herself<br>2. Husband<br>3. Joint decision |               |
| 303                                                                                      | Getting help for health services           | 1. Husband<br>2. Relatives<br>3. Families     |               |
| 304                                                                                      | Using Maternity waiting room               | 1. Yes<br>2. No                               | If yes<br>305 |
| 305                                                                                      | Duration of stay                           | 1. Less than a week<br>2. For one week        |               |
| <b>Section four: knowledge of mothers towards early PNC service</b>                      |                                            |                                               | <b>Code</b>   |
| 401                                                                                      | Knows advantages of PNC                    | 1. Yes<br>1. No                               |               |
| 402                                                                                      | Knows Recommended PNC                      | 2. Yes<br>3. No                               |               |

|     |                                                    |                 |  |
|-----|----------------------------------------------------|-----------------|--|
| 403 | Know the correct timing of PNC                     | 1. Yes<br>2. No |  |
| 404 | Knows that PNC is free services                    | 1. Yes<br>1. No |  |
| 405 | Knows at least one component of the services       | 1. Yes<br>2. No |  |
| 406 | Knows at least on newborn danger sign              | 1. Yes<br>2. No |  |
| 407 | know consequences of not receiving recommended PNC | 1. Yes<br>2. No |  |
| 408 | Know place where PNC is delivered                  | 1. Yes<br>2. No |  |

**THANK YOU VERY MUCH!!!!**
